# Supplementary material for: Glutathione infusion before primary percutaneous coronary intervention: a randomised controlled pilot study
Source: PubMed Central journal article supplement — BMJ Open. 2019 Aug 8;9(8):e025884. doi: 10.1136/bmjopen-2018-025884 (PMC6701599; doi:10.1136/bmjopen-2018-025884), 2019-08-08
Supplement: bmjopen-2018-025884.draft_revisions.pdf [file bmjopen-2018-025884.draft_revisions.pdf]

# BMJ Open

BMJ Open is committed to open peer review. As part of this commitment we make the peer review history of every article we publish publicly available.

When an article is published we post the peer reviewers' comments and the authors' responses online. We also post the versions of the paper that were used during peer review. These are the versions that the peer review comments apply to.

The versions of the paper that follow are the versions that were submitted during the peer review process. They are not the versions of record or the final published versions. They should not be cited or distributed as the published version of this manuscript.

BMJ Open is an open access journal and the full, final, typeset and author-corrected version of record of the manuscript is available on our site with no access controls, subscription charges or pay-per-view fees (<http://bmjopen.bmj.com>).

If you have any questions on BMJ Open's open peer review process please email [info.bmjopen@bmj.com](mailto:info.bmjopen@bmj.com)

# BMJ Open

## Glutathione infusion before primary percutaneous coronary intervention: a randomized controlled trial.

|                               |                                                                                                                                                                                                                                                                                                                                                                                                                                                                                                                                                                                                                                                                                                                                                                                                                                                                                                                                                                                                                                                                                                                                                                                                                             |
|-------------------------------|-----------------------------------------------------------------------------------------------------------------------------------------------------------------------------------------------------------------------------------------------------------------------------------------------------------------------------------------------------------------------------------------------------------------------------------------------------------------------------------------------------------------------------------------------------------------------------------------------------------------------------------------------------------------------------------------------------------------------------------------------------------------------------------------------------------------------------------------------------------------------------------------------------------------------------------------------------------------------------------------------------------------------------------------------------------------------------------------------------------------------------------------------------------------------------------------------------------------------------|
| Journal:                      | <i>BMJ Open</i>                                                                                                                                                                                                                                                                                                                                                                                                                                                                                                                                                                                                                                                                                                                                                                                                                                                                                                                                                                                                                                                                                                                                                                                                             |
| Manuscript ID                 | bmjopen-2018-025884                                                                                                                                                                                                                                                                                                                                                                                                                                                                                                                                                                                                                                                                                                                                                                                                                                                                                                                                                                                                                                                                                                                                                                                                         |
| Article Type:                 | Research                                                                                                                                                                                                                                                                                                                                                                                                                                                                                                                                                                                                                                                                                                                                                                                                                                                                                                                                                                                                                                                                                                                                                                                                                    |
| Date Submitted by the Author: | 06-Aug-2018                                                                                                                                                                                                                                                                                                                                                                                                                                                                                                                                                                                                                                                                                                                                                                                                                                                                                                                                                                                                                                                                                                                                                                                                                 |
| Complete List of Authors:     | Tanzilli, Gaetano; University of Rome La Sapienza, Department of Heart and Great Vessels,<br>Truscelli, Giovanni; Sapienza University of Rome<br>Arrivi, Alessio; Department of Cardiology<br>Carnevale, Roberto; Sapienza University, I Clinica Medica<br>Placanica, Attilio; Department of Cardiology<br>Viceconte, Nicola; Università degli studi di Roma "La Sapienza",<br>Dipartimento Cuore e Grossi Vasi<br>Raparelli, Valeria ; Sapienza University of Rome, I Clinica Medica,<br>Department of Internal Medicine and Medical Specialties<br>Mele, Rita; Sapienza University<br>Cammisotto, Vittoria; Sapienza University, Department of Internal Medicine and Medical Specialties<br>Nocella, Cristina; IRCCS NeuroMed<br>Barillà, Francesco; Sapienza University , Department of the Heart and Great Vessels<br>Lucisano, Luigi; Department of Cardiology<br>Pennacchi, Mauro; Department of Cardiology<br>Granatelli, Antonino; Department of Cardiology<br>Dominici, Marcello; Department of Cardiology<br>Basili, Stefania; Sapienza University of Rome, I Clinica Medica<br>Gaudio, Carlo; University of Rome La Sapienza<br>Mangeri, Enrico; Sapienza University , Department of the Heart and Great Vessels |
| Keywords:                     | Glutathione, Reperfusion Injury, STEMI, hydrogen peroxide                                                                                                                                                                                                                                                                                                                                                                                                                                                                                                                                                                                                                                                                                                                                                                                                                                                                                                                                                                                                                                                                                                                                                                   |
|                               |                                                                                                                                                                                                                                                                                                                                                                                                                                                                                                                                                                                                                                                                                                                                                                                                                                                                                                                                                                                                                                                                                                                                                                                                                             |

SCHOLARONE™  
Manuscripts

1  
2  
3 **Glutathione infusion before primary percutaneous coronary intervention: a randomized**  
4 **controlled trial.**  
5

6 Gaetano Tanzilli<sup>1</sup>, Giovanni Truscelli<sup>1</sup>, Alessio Arrivi<sup>2</sup>, Roberto Carnevale<sup>3</sup>, Attilio Placanica<sup>4</sup>,  
7 Nicola Viceconte<sup>1</sup>, Valeria Raparelli<sup>5</sup>, Rita Mele<sup>6</sup>, Vittoria Cammisotto<sup>7</sup>, Cristina Nocella<sup>8</sup>,  
8 Francesco Barilla<sup>1</sup>, Luigi Lucisano<sup>4</sup>, Mauro Pennacchi<sup>4</sup>, Antonino Granatelli<sup>4</sup>, Marcello Dominici<sup>2</sup>,  
9 Stefania Basili<sup>5</sup>, Carlo Gaudio<sup>1</sup> and Enrico Mangieri<sup>1</sup>  
10  
11  
12  
13  
14  
15  
16  
17

18 <sup>1</sup> Department of the Heart and Great Vessels, Sapienza University of Rome, Rome, Italy  
19

20 <sup>2</sup> Department of Cardiology, "Santa Maria" Hospital, Terni, Italy  
21

22 <sup>3</sup> Department of Medical-Surgical Sciences and Biotechnologies, Sapienza University, Latina, Italy  
23

24 <sup>4</sup> Department of Cardiology, "San Giovanni Evangelista" Hospital, Tivoli, Italy  
25

26 <sup>5</sup> Department of Experimental Medicine, Sapienza University of Rome, Rome, Italy  
27

28 <sup>6</sup> Department of Surgical Sciences, Sapienza University, Rome, Italy  
29

30 <sup>7</sup> Department of Internal Medicine and Medical Specialties, Sapienza University, Rome, Italy  
31

32 <sup>8</sup> IRCCS NeuroMed, Pozzilli (IS), Italy  
33  
34  
35  
36  
37

38 **Corresponding Author:**  
39

40 Gaetano Tanzilli, MD, Department of Heart and Great Vessels "Attilio Reale", Sapienza University  
41 of Rome, Viale del Policlinico 155, 00161 Rome, Italy; +39 06 49973240  
42  
43 [gaetano.tanzilli@uniroma1.it](mailto:gaetano.tanzilli@uniroma1.it)  
44  
45  
46  
47

48 **Word count:** 2808  
49  
50  
51  
52  
53  
54  
55  
56  
57  
58  
59  
60

## Abstract

**Objective** In the setting of reperfused ST-elevation myocardial infarction (STEMI), increased production of reactive oxygen species (ROS) contributes to reperfusion injury. Among ROS, hydrogen peroxide ( $H_2O_2$ ) showed toxic effects on human cardiomyocytes and may induce microcirculatory impairment. Glutathione(GSH) is a water-soluble tripeptide with a potent oxidant scavenging activity. We hypothesized that the infusion of GSH before acute reoxygenation might counteract the deleterious effects of increased  $H_2O_2$  generation on myocardium.

**Methods** Fifty consecutive STEMI patients scheduled to undergo primary angioplasty were randomly assigned, before intervention, to receive an infusion of GSH (2500 mg/25ml over 10 min) followed by drug administration at the same doses at 24, 48, 72 hours elapsing time or placebo. Peripheral blood samples were obtained before and at the end of procedure as well as after 5 days.  $H_2O_2$  production, 8-iso-PGF $2\alpha$  formation,  $H_2O_2$  breakdown activity (HBA) and nitric oxide (NO) bioavailability were determined. Serum cardiac-Troponin T (cTpT) was measured at admission and up to 5 days.

**Results** Following acute reperfusion, a significant reduction of  $H_2O_2$  production ( $p=0.0015$ ) and 8-isoPGF $2\alpha$  levels ( $p=0.0003$ ) as well as a significant increase in HBA ( $p=0.000001$ ) and NO bioavailability ( $p=0.035$ ) was found in the GSH group as compared with placebo. In treated patients, attenuated production of  $H_2O_2$  persisted up to 5 days from the index procedure ( $p=0.009$ ) and was linked to progressive decrease of cTpT levels ( $r=0.41$ ,  $p= 0.023$ ).

**Conclusion** The prophylactic and prolonged infusion of GSH determined a rapid onset and persistent blunting of  $H_2O_2$  generation with positive benefits on myocardial cell survival.

**Key words:** Glutathione; STEMI; Reperfusion Injury; Reactive Oxygen Species; hydrogen peroxide.

## Article summary

### Strengths and limitations of this study

1. In patients who suffer from STEMI, acute reoxygenation of ischemic myocardium can induce additional myocardial cell injury mainly driven by heightened oxidative status.
2. Reactive oxygen species (ROS) generation further contributes to damage myocardium by limiting bioavailability of nitric oxide at microcirculatory level.
3. This pilot study demonstrates for the first time that in the setting of STEMI reperfusion the rapid onset and prolonged antioxidant (scavenging) activity obtained by infusion of GSH protects the myocardium.
4. This study is limited for the lack of clinical end points, the small sample size. Moreover, the absence of morphologic imaging, the qualitative evaluation of GSH-induced improvement of myocardial reperfusion indexes, as assessed in our study, might only represent the effect of a preserved microcirculatory responsiveness to vasoactive substances (i.e. NO) but unable to limit the expansion of myocardial cell damage.

## Introduction

It is well known that reactive oxygen species (ROS) are produced at an accelerated rate in tissues subjected to reperfusion and that the accumulation of ROS contributes to reperfusion injury during reintroduction of molecular oxygen to the ischemic environment.[1,2]

In the setting of ST-Elevation Myocardial Infarction (STEMI), ROS-induced myocardial cell death occurs in the first few minutes of acute reoxygenation[3] and may continue for weeks to months by activation of apoptosis and autophagy processes.[4,5] ROS generation also contributes to structural capillary damage and endothelial dysfunction, which hinder the achievement of an optimal perfusion grade at microcirculatory level.[6,7] Over the time, this may result in adverse left ventricular (LV) remodeling and worse LV function.

Among ROS, hydrogen peroxide ( $H_2O_2$ ) shows an important role in ischemia/reperfusion damage. In particular, the exposure of cultured human cardiomyocytes to  $H_2O_2$  has determined rapid onset and progressive oxidative cell death.[8] Moreover,  $H_2O_2$  influences platelet activation and promotes vascular dysfunction through thromboxane  $A_2$  and isoprostanes formation, which are vasoconstrictors and powerful aggregating molecules derived from lipid peroxidation of esterified unsaturated fatty acids.[9-11]

Human possesses numerous enzymatic and non-enzymatic antioxidant systems. Among enzymatic system, glutathione peroxidase (GPx) plays an important role to prevent potentially deleterious effects of  $H_2O_2$ . [12] Thus, the reduced plasma level of glutathione (GSH), a water-soluble tripeptide with a potent oxidant scavenging activity and fundamental substrate for GPx activity, could have a key role in promoting myocardial and endothelial cell damage.[13] In fact, a decrease in myocardial GSH content has been observed during ischemia and reperfusion of the ischemic myocardium.[14]

Despite robust evidences regarding the role of ROS in reperfusion injury, currently, in clinical practice, there are no treatments aimed to prevent ROS generation. According to our previous hypothesis,[15] during reperfusion of ST-elevation myocardial infarction (STEMI), the use of GSH

1  
2  
3 might counteract deleterious effect of augmented oxidant activity. Therefore, we performed a pilot  
4 *proof-of-concept* study to explore whether intravenous GSH administration, just before reopening of  
5 infarct related artery and after effective reperfusion, is able to attenuate the cytotoxic activity of  
6  
7 H<sub>2</sub>O<sub>2</sub> on myocardium.  
8  
9

## 10 11 **Methods**

### 12 13 **Study Design**

14  
15 GSH2014 (EurodraCT number 2014-004486-25) is a multicenter, no profit, randomized, double-  
16 blind, prospective, placebo-controlled trial. The Department of Heart and Great Vessel "A. Reale",  
17 Sapienza University of Rome, Italy was the coordinator centre. The study has been planned  
18 according to principles of the declaration of Helsinki. Italian Medicines Agency (AIFA)  
19 authorization and single Ethic Committee approval has been obtained for all the centers  
20 participating the study (n=3). The coordinating center designated the protocol. An external Core  
21 Lab processed the data. Written informed consent was obtained from all patients enrolled.  
22  
23  
24  
25  
26  
27  
28  
29

### 30 31 **Study population and protocol**

32  
33 Between March and August 2017, we screened 157 consecutive STEMI patients, age >18 years,  
34 both sexes, referred to the hospitals of the centre of Italy belonging to our working group for  
35 primary percutaneous coronary intervention (pPCI). Inclusion criteria were: typical chest pain  
36 lasting more than 30 min with pain onset <12 h, ST segment elevation >0.2 mV in at least two  
37 contiguous leads in the initial ECG, successful pPCI (residual coronary stenosis <20%) and blood  
38 sampling for biochemical determinations collected prior to pPCI. Exclusion criteria were:  
39 symptoms duration > 12 h (n=15), rescue PCI (n=16), cardiogenic shock (n=3), left main disease  
40 (n=3), evidence of coronary collateral vessels (Rentrop score of 2 or 3 for the area at risk) (n=5),  
41 prior myocardial infarction (n=7), estimated glomerular filtration rate less than 30 ml/min (n=13),  
42 acute infection (n=2), treatment with systemic corticosteroids (n=4) or oral anticoagulants (n=7),  
43 malignancy (n=3), in-stent thrombosis (n=3), lack of consent to participate (n=18). Additionally, 8  
44  
45  
46  
47  
48  
49  
50  
51  
52  
53  
54  
55  
56  
57  
58  
59  
60

1  
2  
3 patients were ineligible because no blood samples were collected before the start of procedure.  
4  
5 Finally, a total of 50 patients were enrolled.

6  
7 After percutaneous access was obtained, an intravenous bolus of 5.000 U of unfractionated heparin  
8  
9 was administered, with sufficient supplements (if necessary) to maintain an activated clotting time  
10  
11 (ACT)  $\geq$  250 seconds during interventions. After baseline collection of peripheral blood samples,  
12  
13 patients were randomized to an intravenous infusion of GSH (2500 mg/25 ml over 10 min) or  
14  
15 placebo (saline solution) before pPCI. Patients underwent pPCI according to standard protocols.  
16  
17 The use of thrombus aspiration, glycoprotein IIb/IIIa inhibition was left to the discretion of the  
18  
19 treating physician. Multivessel PCI was performed in a staged fashion (7 to 10 days from index  
20  
21 procedure). All patients had drug-eluting stents implanted in treated vessels. After interventions,  
22  
23 GSH was infused at the same doses at 24, 48, 72 hours elapsing time. Further blood samples were  
24  
25 obtained at the end of procedure and 5 days from index procedure. Serum cardiac Troponin T  
26  
27 (cTpT) was measured at admission, before the procedure and after reperfusion every 6 h over the  
28  
29 next 2 days, and thereafter once a day up to 5 days. Serum cTpT levels were measured using an  
30  
31 automated enzyme immunoassay system (Thermo Scientific, code EH TNNT1) with the upper limit  
32  
33 of normal being 0.035 ng/ml in our laboratory. The area under the curve (AUC) (expressed in  
34  
35 arbitrary units) troponin release was measured in each patient by computerized planimetry. After  
36  
37 60'-90', a post-procedural 12 leads- ECG for ST measurement were performed. Corrected TIMI  
38  
39 frame count (cTFC) and TIMI myocardial perfusion grade (TMPG) were assessed before and after  
40  
41 pPCI as previously described.<sup>16</sup> The interventional cardiologists who performed angiographic  
42  
43 evaluation were unaware of the study assignment. Digital angiograms were analyzed off-line with  
44  
45 the use of an automated edge detection system (Cardiovascular Medical System, MEDIS Imaging  
46  
47 Systems, Leiden, the Netherlands).

## 52 **Randomisation and blinding**

53  
54 An individual not involved in the study assigned codes to the study treatments, randomly allocated  
55  
56 patients to an intravenous infusion of GSH (2500 mg/25 ml over 10 min) or placebo (saline  
57  
58



1  
2  
3 solution) before pPCI and kept the key in a sealed envelope. The randomisation was carried out by a  
4  
5 computer-generated random sequence. The authors and laboratory technicians were unaware of the  
6  
7 treatment allocation.

### 8 9 **Primary Endpoint**

10  
11 GSH prophylactic infusion at the time of pPCI followed by drug administration up to 3 days after  
12  
13 procedure would attenuate ROS induced myocardial damage as assessed by measuring biochemical  
14  
15 markers of cell death.

### 16 17 **Secondary Endpoints**

18  
19 GSH prophylactic infusion would improve myocardial reperfusion indexes as assessed by  
20  
21 evaluation of cTFC and TMPG.

### 22 23 **Peripheral blood samples**

24  
25 Blood samples were drawn from antecubital vein, before the start of procedure and after stent  
26  
27 deployment in all patients and then collected into tubes without anticoagulant or with 3.8% sodium  
28  
29 citrate, lithium heparin and EDTA and centrifuged at 300×g for 10 min to obtain supernatant.  
30  
31 Plasma and serum aliquots were stored at -80°C in appropriate cuvettes until assayed. Markers of  
32  
33 oxidative stress and antioxidant system were analyzed in serum samples.

### 34 35 **H<sub>2</sub>O<sub>2</sub> production**

36  
37 The H<sub>2</sub>O<sub>2</sub> was evaluated by a Colorimetric Detection Kit (Arbor Assays, Ann Arbor, Michigan, US)  
38  
39 and expressed as μM. Intra-assay and inter-assay coefficients of variation were 2.1% and 3.7%,  
40  
41 respectively.  
42  
43

### 44 45 **Determination of % HBA in peripheral serum**

46  
47 The evaluation of the ability to detoxify H<sub>2</sub>O<sub>2</sub> was assessed by the analysis of the H<sub>2</sub>O<sub>2</sub> breakdown  
48  
49 activity (HBA) in serum with HBA assay kit (Aurogene, Rome, Italy, code HPSA-50). The % of  
50  
51 HBA was calculated according to the following formula: % Of HBA = [(Ac-As) / Ac] X 100 where  
52  
53 Ac is the absorbance of H<sub>2</sub>O<sub>2</sub> 1.4 mg/ml and As is the absorbance in the presence of the serum  
54  
55 sample.  
56  
57

### **Serum Nitric Oxide (NO) bioavailability**

A colorimetric assay kit (Cell Biolabs, San Diego, CA US) was used to determine NO bioavailability by measurement of the nitric oxide metabolites nitrite and nitrate (NO<sub>x</sub>) in the serum. Intra-assay and inter-assay coefficients of variation were 2.9% and 1.7% respectively.

### **Serum 8-iso-Prostaglandin F<sub>2α</sub> formation**

Concentration of 8-iso-PGF<sub>2α</sub> in serum was measured by validated enzyme immunoassay (EIA) method (DRG International, Springfield, NJ, USA). Intra-assay and inter-assay coefficients of variation were 5.8% and 5.0% respectively. Values were expressed as pmol/L.

### **Myocardial function**

After 120 minutes and 5 days from the intervention, left ventricular end-diastolic volume (LVEDV), left ventricular end-systolic volume (LVESV) and ejection fraction (LVEF) were calculated by the biplane Simpson's rule, as recommended by the American Society of Echocardiography. The mean values of three measurements were used for statistical evaluation.

### **Statistical analysis**

Categorical variables were reported as counts (percentage) and continuous variables as means ± standard deviation (SD). We tested the independence of categorical variables by  $\chi^2$  test and the normal distribution of parameters by Kolmogorov-Smirnov test. We used Student paired and unpaired t test, repeated measure ANOVA and Pearson product-moment correlation analysis to evaluate normally distributed continuous variables. Appropriate nonparametric tests (Mann-Whitney U test, Wilcoxon rank test and Spearman rank correlation test) were employed for all the other variables. As an overall nonparametric ANOVA, the Friedman test for the analysis of intragroup variations was used. In cases of significance, we compared pair related samples using the Wilcoxon test. The intergroup analysis was performed with the nonparametric Mann-Whitney U-test. Only two-tailed probabilities were used for testing statistical significance. Probability values <

0.05 were regarded as statistically significant. All calculations were made with the computer program STATISTICA 7 (StatSoft, Tulsa, OK, USA).

## Results

**Population.** Twenty-five patients randomly received GSH and 25 placebo. All patients completed the phases of the study and no side effects were observed during or after GSH or placebo infusion. Clinical and angiographic characteristics of patients are shown in Table 1 and 2. The baseline characteristics were well balanced between the two groups.

**Oxidative stress, antioxidant status and vascular function in peripheral samples.** Biochemical data are summarized in Table 3. Baseline H<sub>2</sub>O<sub>2</sub> and 8-iso-PGF2 $\alpha$  levels were similar between treated patients and controls. After PCI, a significant reduction of H<sub>2</sub>O<sub>2</sub> production and 8-iso-PGF2 $\alpha$  levels was observed in GSH group as compared to controls (Figure 1A and B). Moreover, a significant increase in HBA and NO bioavailability was observed (Figure 1C and D). At the 5 days from index procedure, a persistent significant reduction of H<sub>2</sub>O<sub>2</sub> production and a sustained increase in HBA and NO bioavailability was observed in the GSH group as compared with controls (Figure 1A-D).

**Serological markers of myocardial injury.** Baseline cTnT mean values were similar between GSH and placebo groups ( $176.0 \pm 20.9$  pg/ml vs.  $165.4 \pm 20.9$  pg/ml,  $p=0.079$ ). At 12 hours and 5 days after pPCI, GSH-treated patients showed a progressive decrease of cTnT levels ( $170.0 \pm 44.7$  pg/ml and  $137.9 \pm 23.7$  pg/ml;  $-21 \pm 23.1\%$ ,  $p=0.009$  vs. baseline). Differently, a significant increase and persistence of high values of cTnT were observed in placebo group ( $183.0 \pm 34.8$  pg/ml and  $181.9 \pm 18.0$  pg/ml;  $+12.4 \pm 23.1\%$ ,  $p=0.029$  vs. baseline) (Figure 2A). A tight correlation between percentage changes of H<sub>2</sub>O<sub>2</sub> and cTnT levels from baseline to 5 days was found in treated group (Figure 2B).

**Myocardial Reperfusion indexes.** Post procedural cTFC values did not show a statistical significant reduction between treated and control groups ( $20.7 \pm 7.3$  vs.  $23.4 \pm 5.1$ ,  $p=0.156$ ). Interestingly, 6 patients (24%) in the placebo group and 15 (60%) patients in GSH group reached

1  
2  
3 lower-risk ( $\leq 20$  frames/s) cTFC class ( $p=0.019$ ). After PCI,  $\text{TMPG} \geq 2$  was assessed in 21 patients  
4 (84%) and 14 patients (56%) of the GSH and placebo groups, respectively ( $p = 0.064$ ). Of note, 11  
5 patients (44%) of the GSH group only had  $\text{TMPG}=3$  ( $p=0.0002$  vs. controls). Post-reperfusion  
6 cTFC values showed a significant correlation with changes of 8-iso-PGF $2\alpha$  ( $R=0.55$ ,  $p=0.012$ )  
7 levels from baseline.  
8

9  
10  
11  
12  
13 **Myocardial function.** Myocardial function was not different between groups after either baseline  
14 or at discharge. There was no significant difference between groups regarding LVEF, LVEDV or  
15 LVESV at any time point, although a trend towards reduced LVED, index of left ventricular  
16 remodelling, was assessed in treated patients (Table 4).  
17  
18  
19  
20

## 21 Discussion

22  
23  
24 This pilot study demonstrates for the first time that in the setting of STEMI reperfusion the rapid  
25 onset and prolonged antioxidant (scavenging) activity obtained by infusion of GSH protects the  
26 myocardium. Data from experimental and clinical studies suggest that following reperfusion  
27 myocardial cells death largely contributes to the final infarct size.[17,18] On the other hand, the  
28 extent of damaged myocardium is the most important predictor of adverse ventricular remodelling  
29 and it is linearly dependent upon the amount of myocardial salvage by and after reperfusion. Thus,  
30 attenuation of pro-oxidant state is an important goal in cardioprotective interventions.[19]  
31 Noteworthy, the serum of GSH treated patients showed a greater capacity to detoxify  $\text{H}_2\text{O}_2$   
32 evaluated by the HBA, an assay that measure the percentage of  $\text{H}_2\text{O}_2$  neutralized into the samples.<sup>20</sup>  
33  
34 We found an early and considerable increase of HBA, with positive effects on myocardial cell  
35 survival. Current evidences demonstrate that hostile oxidant environment promotes cardiomyocyte  
36 death in the first few minutes of reflow suggesting the existence of a tight window of effective  
37 cardioprotection.[21,22] Therefore, ROS-induced injury may continue for weeks to months as a  
38 result of activation of programmed cell death. Our data have shown a persistent heightened  
39 oxidative status along with decreased scavenging activity in untreated patients. This behaviour  
40 makes the duration of pharmacologic interventions a central point of cardioprotection strategies. In  
41  
42  
43  
44  
45  
46  
47  
48  
49  
50  
51  
52  
53  
54  
55  
56  
57  
58  
59  
60

1  
2  
3 the present study, GSH infusion, starting just before reperfusion with subsequent administration up  
4 to 3 days after, promoted early and sustained increase of serum HBA with attenuated production of  
5  $H_2O_2$  which was highly related to progressive significant reduction of serological signs of  
6 myocardial injury. In the clinical setting, the efficacy of reperfusion relies on the assessment of  
7 cardiac biomarkers release, which represents the demonstration of irreversible decay of cardiac  
8 myocytes. Our data show a progressive significant decrease of serum cTnT release during the 5  
9 days of reperfusion in the GSH-treated patients compared with the control group resulting in a 21%  
10 reduction of myocardial damage. Despite that, in our population, the systolic function was not  
11 different between groups after reperfusion, although a trend towards reduced LVEDV was observed  
12 in treated patients. A possible explanation relies on the fact that inside the area at risk variable  
13 amount of hibernated and stunned myocardium may coexist, thus affecting the prompt recovery of  
14 contractility after reperfusion.[23] Cells have a number of mechanisms for dealing with the toxic  
15 effects of oxygen. One of the most important is connected with the widely distributed tripeptide  
16 thiol glutathione.[12,24] In particular, the glutathione redox cycle is a more efficient antioxidant  
17 protective mechanism of the heart, which acts by maintaining thiol groups of enzymes and other  
18 proteins in their reduced state thus preventing cell membrane lipid peroxidation and limiting  
19 cardiomyocytes loss.[25] Furthermore, in our study, a close relation between reduced myocardial  
20 reperfusion perfusion, increased of 8-iso-PGF $2\alpha$  serum levels has been observed, suggesting that  
21 oxidative unbalance may be involved in microcirculation functional damage. As previously  
22 reported, impaired tissue-level perfusion develops within minutes of established acute  
23 revascularization of ischemic areas[26] and persists for at least 1 week.[27] In this context, there is  
24 robust evidence that ROS mediated isoprostanes production contributes importantly to the post-  
25 reperfusion microvascular impairment.[28,29] Current findings implement this observation by  
26 demonstrating a sustained production of isoprostanes up to 5 days after reperfusion thereby  
27 suggesting their contributory role in the pathogenesis and persistence of microvascular dysfunction  
28 that may affect myocardial cell survival. The infusion of GSH before and 24, 48, 72 hours after  
29  
30  
31  
32  
33  
34  
35  
36  
37  
38  
39  
40  
41  
42  
43  
44  
45  
46  
47  
48  
49  
50  
51  
52  
53  
54  
55  
56  
57  
58  
59  
60

1  
2  
3 pPCI reduced isoprostanes serum levels and their reduction was linked to improvement of  
4 myocardial reperfusion indexes. Moreover, the increase in extracellular peroxide oxidants may  
5 reduce bioavailability of nitric oxide that is thought to contribute to promoting platelet hyperactivity  
6 and vasoconstriction.[9] In our study, GSH supplementation seems to have a primary role in  
7 preserving NO bioavailability and its vasodilator capacity at microcirculatory level.  
8  
9

10  
11  
12  
13 This study has implications and limitations. Although the positive effects on reperfusion indexes  
14 and biochemical signs of myocardial necrosis suggest the value of prophylactic and prolonged GSH  
15 administration in preventing reperfusion injury, the lack of clinical end points and the small sample  
16 size limit the readiness of the study for clinical purposes. In addition, at discharge LVEF did not  
17 change between treated patients and controls thereby limiting the possibility to translate  
18 biochemical and angiographic benefits into improvement of prognosis.  
19  
20  
21  
22  
23  
24  
25

26 A further concern regards the lack of quantitative assessment of both infarct size and microvascular  
27 obstruction extent. Within a defined area at risk, the manifestations of ischemia-reperfusion  
28 vascular injury go from reversible functional impairments to irreversible structural damage and  
29 contribute to final amount of infarct myocardium. In absence of morphologic imaging, the  
30 qualitative evaluation of GSH-induced improvement of myocardial reperfusion indexes, as assessed  
31 in our study, might only represent the effect of a preserved microcirculatory responsiveness to  
32 vasoactive substances (i.e. NO) but unable to limit the expansion of myocardial cell damage.  
33  
34  
35  
36  
37  
38  
39  
40  
41  
42  
43  
44  
45  
46  
47  
48  
49  
50  
51  
52  
53  
54  
55  
56  
57  
58  
59  
60

61  
62  
63  
64  
65  
66  
67  
68  
69  
70  
71  
72  
73  
74  
75  
76  
77  
78  
79  
80  
81  
82  
83  
84  
85  
86  
87  
88  
89  
90  
91  
92  
93  
94  
95  
96  
97  
98  
99  
100

1  
2  
3 In conclusion, we have shown that prophylactic and prolonged GSH infusion mitigates the negative  
4 effects of the excessive and persistent H<sub>2</sub>O<sub>2</sub> formation on myocardial cells. Therefore, in patients  
5 undergoing pPCI the infusion of a powerful antioxidant scavenger, such as GSH, may be useful to  
6 improve microcirculatory perfusion in order to further blunt the injury of myocardial cells. At  
7 moment, our data represent only a hypothesis generating observation that requires larger STEMI  
8 population and prolonged follow-up to confirm the role of GSH administration as cardioprotective  
9 therapy.  
10  
11  
12  
13  
14  
15  
16  
17  
18  
19  
20  
21  
22  
23  
24  
25  
26  
27  
28  
29  
30  
31  
32  
33  
34  
35  
36  
37  
38  
39  
40  
41  
42  
43  
44  
45  
46  
47  
48  
49  
50  
51  
52  
53  
54  
55  
56  
57  
58  
59  
60

## Contributors

GT, EM led on the conception, design and writing of the study and study protocol with substantial contributions to the design, writing, critical review of intellectual content; GT, AA, AP, NV, RM, enrollment of patients; RC, VC, CN, provided laboratory analyses; VR, SB, provided further essential statistical advice and expertise on the study protocol; FB, LL, MP, CG, providing expert clinical support; AG, MD, made substantial contributions to the trial design and management.

## Ethics and dissemination

Italian Medicines Agency (AIFA) authorization and single Ethic Committee approval has been obtained for all the centers participating the study. Dissemination of results will be via peer-reviewed research publications both online and in print, conference presentations, posters, patient forums and Trust bulletins.

## Data Availability

The data used to support the findings of this study are included within the article.

## A data sharing statement

No additional data available

## Conflicts of Interest

Authors declare that there are not conflicts of interest.



## References

- 1 Yellon DM, Hausenloy DJ. Myocardial reperfusion injury. *N Engl J Med* 2007;357:1121-35.
- 2 Zhu X, Zuo L, Cardounel AJ, et al. Characterization of in vivo tissue redox status, oxygenation, and formation of reactive oxygen species in postischemic myocardium. *Antioxid Redox Signal* 2007;9:447-455.
- 3 Grill HP, Zweier JL, Kuppusamy P, et al. Direct measurement of myocardial free radical generation in an in vivo model: effects of postischemic reperfusion and treatment with human recombinant superoxide dismutase. *J Am Coll Cardiol* 1992;20:1604-1611.
- 4 McCully JD, Wakiyama H, Hsieh YJ, et al. Differential contribution of necrosis and apoptosis in myocardial ischemia-reperfusion injury. *Am J Physiol*. 2004;286:H1923-H1935.
- 5 Dong Y, Undyala VV, Gottlieb RA, et al. Autophagy: definition, molecular machinery, and potential role in myocardial ischemia-reperfusion injury. *J Cardiovasc Pharmacol Ther* 2010;15:220-230.
- 6 Ørn S, Manhenke C, Greve OJ, et al. Microvascular obstruction is a major determinant of infarct healing and subsequent left ventricular remodelling following primary percutaneous coronary intervention. *Eur Heart J* 2009;30:1978-1985.
- 7 Heusch G, Kleinbongard P, Skyschally A. Myocardial infarction and coronary microvascular obstruction: an intimate, but complicated relationship. *Basic Res Cardiol* 2013;108:380.
- 8 Tanimoto T, Parseghian MH, Nakahara T, et al. Cardioprotective effects of HSP72 administration on ischemia-reperfusion injury. *J Am Col Cardiol* 2017;70:1479-1492.
- 9 Pignatelli P, Pulcinelli FM, Lenti L, et al. Hydrogen peroxide is involved in collagen-induced platelet activation. *Blood* 1998;91:484-90.

- 1  
2  
3 10 Freedman JE. Oxidative stress and platelets. *Arterioscler Thromb Vasc Biol* 2008;28:11–6.  
4  
5 11 Basili S, Pignatelli P, Tanzilli G, et al. Anoxia-reoxygenation enhances platelet ThromboxaneA2  
6  
7 production via Reactive Oxidant Species-generated NOX2: effect in patients undergoing elective  
8  
9 percutaneous coronary intervention. *Arterioscler Thromb Vasc Biol* 2011;31:1766-1771.  
10  
11 12 Takebe G, Yarimizu J, Saito Y, et al. A comparative study on the hydroperoxide and thiol  
12  
13 specificity of the glutathione peroxidase family and seleno-protein P. *J Biol Chem* 2002;277:41254-  
14  
15 41258.  
16  
17 13 Jin RC, Mahoney CE, Anderson LC, et al. Glutathione peroxidase-3 deficiency promotes  
18  
19 platelet-dependent thrombosis in vivo. *Circulation* 2011;123:1963-1973.  
20  
21 14 Singh A, Lee KJ, Lee CY, et al. Relation between myocardial glutathione content and extent of  
22  
23 ischemia-reperfusion injury. *Circulation* 1989;80:1795-1804.  
24  
25 15 Truscelli G, Tanzilli G, Viceconte N, et al. Glutathione sodium salt as a novel adjunctive  
26  
27 treatment for acute myocardial infarction. *Med Hypotheses* 2017;102:48-50.  
28  
29 16 Henriques JP, Zijlstra F, van 't Hof AW, et al. Angiographic assessment of reperfusion in acute  
30  
31 myocardial infarction by myocardial blush grade. *Circulation* 2003;107:2115-2119.  
32  
33 17 Brener SJ, Maehara A, Dizon JM, et al. Relationship between myocardial reperfusion, infarct  
34  
35 size, and mortality. *J Am Coll Cardiol* 2013;6:718-724.  
36  
37 18 Musiolik J, van Caster P, Skyschally A, et al. Reduction of infarct size by gentle reperfusion  
38  
39 without activation of reperfusion injury salvage kinases in pigs. *Cardiovasc Res* 2010;85:110-117.  
40  
41 19 Hausenloy DJ, Garcia-Dorado D, Bøtker HE, et al. Novel targets and future strategies for acute  
42  
43 cardioprotection: position paper of the European Society of cardiology working group on cellular  
44  
45 biology of the heart. *Cardiovasc Res* 2017; 113:564-585.  
46  
47 20 Carnevale R, Nocella C, et al. Blood hydrogen peroxide break-down activity in healthy subjects  
48  
49 and in patients at risk of cardiovascular events. *Atherosclerosis* 2018;274:29-34.  
50  
51 21 Piper HM, Abdallah Y, Schäfer C. The first minutes of reperfusion: a window of opportunity for  
52  
53 cardioprotection. *Cardiovasc Res* 2004;61:365-71.  
54  
55  
56  
57  
58  
59

- 1  
2  
3 22 Zhu X, Zuo L. Characterization of oxygen radical formation mechanism at early cardiac  
4 ischemia. *Cell Death and Disease* 2013;4:e787.  
5  
6  
7 23 Bolli R, Marban E. Molecular and cellular mechanisms of myocardial stunning. *Physiol Rev*  
8  
9 1999;79:609-634.  
10  
11 24 Freedman JE, Frei B, Welch GN, et al. Glutathione peroxidase potentiates the inhibition of  
12 platelet function by S-nitrosothiols. *J Clin Invest* 1995;96:394-400.  
13  
14  
15 25 Meister A. Glutathione-Ascorbic Acid Antioxidant System in Animals. *J Biol Chem*  
16 1994;269:9397-9400.  
17  
18  
19 26 Reffelmann T, Kloner RA. Microvascular reperfusion injury: rapid expansion of anatomic no  
20 reflow during reperfusion in the rabbit. *Am J Physiol Heart Circ Physiol* 2002;283:H1099-H1107.  
21  
22  
23 27 Rochitte CE, Lima JA, Bluemke DA, et al. Magnitude and time course of microvascular  
24 obstruction and tissue injury after acute myocardial infarction. *Circulation* 1998;98:1006-1014.  
25  
26  
27 28 Basili S, Tanzilli G, Mangieri E, et al. Intravenous Ascorbic Acid Infusion Improves Myocardial  
28 Perfusion Grade During Elective Percutaneous Coronary Intervention. Relationship With Oxidative  
29 Stress Markers. *J Am Coll Cardiol Intv* 2010;3:221-229.  
30  
31  
32 29 Yaqin X, Huo Y, Toufektsian MC, et al. Activated platelets contribute importantly to myocardial  
33 reperfusion injury. *Am J Physiol Heart Circ Physiol* 2006;290:H692-H699.  
34  
35  
36  
37  
38  
39  
40  
41  
42  
43  
44  
45  
46  
47  
48  
49  
50  
51  
52  
53  
54  
55  
56  
57  
58  
59  
60

**Table 1. Clinical characteristics of the study population**

| <b>Variables</b>                      | <b>GSH group<br/>(n=25)</b> | <b>Placebo group<br/>(n=25)</b> | <b>P value</b> |
|---------------------------------------|-----------------------------|---------------------------------|----------------|
| <b>Age (y, mean±SD)</b>               | 66 ± 10.7                   | 66.9 ± 9.1                      | 0.74           |
| <b>Male, n (%)</b>                    | 15 (60)                     | 13 (52)                         | 0.98           |
| <b>Body-mass index§<br/>(mean+SD)</b> | 26.9 ± 3.9                  | 20 ± 3.8                        | 0.38           |
| <b>Killip class ≥ 3,<br/>n (%)</b>    | 2 (8)                       | 0 (0)                           | 0.47           |
| <b>Diabetes Mellitus, n<br/>(%)</b>   | 5 (20)                      | 5 (20)                          | 1              |
| <b>Hypertension, n (%)</b>            | 14 (56)                     | 17 (68)                         | 0.56           |
| <b>Dyslipidemia, n (%)</b>            | 11 (44)                     | 13 (52)                         | 0.77           |
| <b>Statin use, n (%)</b>              | 8 (32)                      | 8 (32)                          | 1              |
| <b>Smokers, n (%)</b>                 | 17 (68)                     | 13 (52)                         | 0.38           |

§ The body-mass index is the weight in kilograms divided by the square of the height in meters.

**Table 2. Angiographic parameters**

| <b>Variables</b>                                     | <b>GSH group<br/>(n=25)</b> | <b>Placebo group<br/>(n=25)</b> | <b>P value</b> |
|------------------------------------------------------|-----------------------------|---------------------------------|----------------|
| <b>Ischemia time</b><br>(min; mean $\pm$ SD)         | 286 $\pm$ 88                | 270 $\pm$ 96                    | 0.85           |
| <b>Thrombus Burden <math>\geq</math> 3,</b><br>n (%) | 12 (48)                     | 11 (44)                         | 0.77           |
| <b>Thrombus aspiration,</b> n<br>(%)                 | 13 (52)                     | 12 (48)                         | 0.87           |
| <b>GP IIb/IIIa inhibitors,</b><br>n (%)              | 2 (8)                       | 3 (12)                          | 0.63           |
| <b>MVD,</b> n (%)                                    | 13 (52)                     | 11 (44)                         | 0.77           |
| <b>2 vessels,</b>                                    | 8 (32)                      | 5 (20)                          | 0.89           |
| <b>3 vessels,</b>                                    | 5 (20)                      | 6 (24)                          |                |
| <b>Staged PCI,</b> n (%)                             | 9 (36)                      | 5 (20)                          |                |
| <b>IRA:</b>                                          |                             |                                 |                |
| <b>LAD,</b> n (%)                                    | 10 (40)                     | 9 (36)                          | 0.77           |
| <b>LCx,</b> n (%)                                    | 5 (20)                      | 6 (24)                          | 0.73           |
| <b>RCA,</b> n (%)                                    | 10 (40)                     | 10 (40)                         | 1              |
| <b>cTFC after PCI</b><br>(frames/sec, mean $\pm$ SD) | 20.7 $\pm$ 7.3              | 23.4 $\pm$ 5.1                  | 0.156          |
| <b>cTFC &lt; 20 frames/sec,</b><br>n (%)             | 15 (60)                     | 6 (24)                          | 0.019          |
| <b>MPG after PCI <math>\geq</math> 2,</b> n<br>(%)   | 21 (64)                     | 14 (48)                         | 0.064          |

MPG after PCI = 3, n 11 (44) 0 (0) 0.002  
(%)

PCI = percutaneous coronary intervention; IRA = infarct related coronary artery; LAD = left anterior descending coronary artery; LCx = left circumflex coronary artery; RCA = Right coronary artery; MPG = myocardial perfusion grade; cTFC = corrected TIMI frame count.

**Table 3. Biochemical data**

| Variable                                            | Baseline   |            |       | Reperfusion |            |        | Follow-up (5 days) |            |        |
|-----------------------------------------------------|------------|------------|-------|-------------|------------|--------|--------------------|------------|--------|
|                                                     | GSH        | Placebo    | p     | GSH         | Placebo    | p      | GSH                | Placebo    | p      |
| <b>H<sub>2</sub>O<sub>2</sub></b><br>μM,<br>mean±SD | 40.6±8.4   | 43.6±11.6  | 0.305 | 28.4±12     | 42.8±14.1  | 0.0003 | 24±7               | 39.5±17.3  | 0.0001 |
| <b>8-iso-PGF2α</b><br>pmol/L,<br>mean±SD            | 214.6±81.1 | 211.9±92.1 | 0.91  | 163.6±44.7  | 217.6±51.6 | 0.0003 | 159.9±34.2         | 213.1±50.9 | 0.0001 |
| <b>HBA</b><br>%,<br>mean±SD                         | 43.6±7.4   | 43.4±11.9  | 0.94  | 57.9±8.6    | 43.9±8.7   | 0.0001 | 62.9±10.5          | 45.2±13.0  | 0.0001 |
| <b>NO</b><br>μM,<br>mean±SD                         | 16.3±5.7   | 16.5±4.7   | 0.89  | 27.7±7.2    | 22.4±10    | 0.0356 | 35.5±8.1           | 23.5±15.5  | 0.0013 |

GSH = reduced Glutathione; H<sub>2</sub>O<sub>2</sub> = Hydrogen Peroxide; 8-iso-PGF2α = 8-iso-Prostaglandin F2α;  
HBA = H<sub>2</sub>O<sub>2</sub> break-down activity

**Table 4. Left Ventricular echocardiographic parameters at baseline and at follow-up**

| Echo parameters                                                                                                                                                | Placebo<br>(n= 25) | GSH<br>(n=25) | <i>P</i> -value* |
|----------------------------------------------------------------------------------------------------------------------------------------------------------------|--------------------|---------------|------------------|
| <b>Baseline</b>                                                                                                                                                |                    |               |                  |
| <b>LVEDV (mL/m<sup>2</sup>)</b>                                                                                                                                | 121.3 ± 17.2       | 124.4 ± 22.3  | 0.44             |
| <b>LVESV (mL/m<sup>2</sup>)</b>                                                                                                                                | 65.4 ± 11.3        | 66.3 ± 13.2   | 0.91             |
| <b>LVEF (%)</b>                                                                                                                                                | 47.5 ± 4.9         | 46.9 ± 4.8    | 0.42             |
| <b>Follow-up</b>                                                                                                                                               |                    |               |                  |
| <b>LVEDV (mL/m<sup>2</sup>)</b>                                                                                                                                | 118.1 ± 17.8       | 113.2 ± 14.1  | 0.42             |
| <b>LVESV (mL/m<sup>2</sup>)</b>                                                                                                                                | 60.9 ± 10.7        | 58.8 ± 12.5   | 0.91             |
| <b>LVEF (%)</b>                                                                                                                                                | 49.1 ± 3.2.0       | 49.8 ± 3.7    | 0.42             |
| <b>LVEDV = left ventricular end-diastolic volume; LVESV = left ventricular end-Systolic volume; LVEF = left ventricular ejection fraction-diastolic volume</b> |                    |               |                  |

### Figure Legend

**Figure 1.** H<sub>2</sub>O<sub>2</sub> production (A), 8-iso-PGF<sub>2</sub>α formation (B), hydrogen peroxide breakdown activity (HBA) (C) and NO bioavailability (D) at baseline, after 2 hours (T2h) and at the 5 days (T5d) from the PCI in patients received GSH (n=25, dashed line) or placebo (n=25, continuous line) (\*\*p <0.01, \*\*\*p <0.001, \*p <0.05).

**Figure 2.** cTnT levels at baseline, after 12 hours (T12h) and at the 5 days (T5d) from the PCI in patients received GSH (n=25, dashed line) or placebo (n=25, continuous line) (A) (\*\*p <0.01 vs. T0, \*p <0.05 vs. T0, §p <0.05 between groups).

Linear correlation between % Δ H<sub>2</sub>O<sub>2</sub> and % Δ cTnT in GSH treated group (B).



1  
2  
3  
4  
5  
6  
7  
8  
9  
10  
11  
12  
13  
14  
15  
16  
17  
18  
19  
20  
21  
22  
23  
24  
25  
26  
27  
28  
29  
30  
31  
32  
33  
34  
35  
36  
37  
38  
39  
40  
41  
42  
43  
44  
45  
46  
47  
48  
49  
50  
51  
52  
53  
54  
55  
56  
57  
58  
59  
60

For peer review only

GSH Treatment  
 Placebo Treatment

1  
2  
3  
4  
5  
6  
7  
8  
9  
10  
11  
12  
13  
14  
15  
16  
17  
18  
19  
20  
21  
22  
23  
24  
25  
26  
27  
28  
29  
30  
31  
32  
33  
34  
35  
36  
37  
38  
39  
40  
41  
42  
43  
44  
45  
46  
47  
48  
49  
50  
51  
52  
53  
54  
55  
56

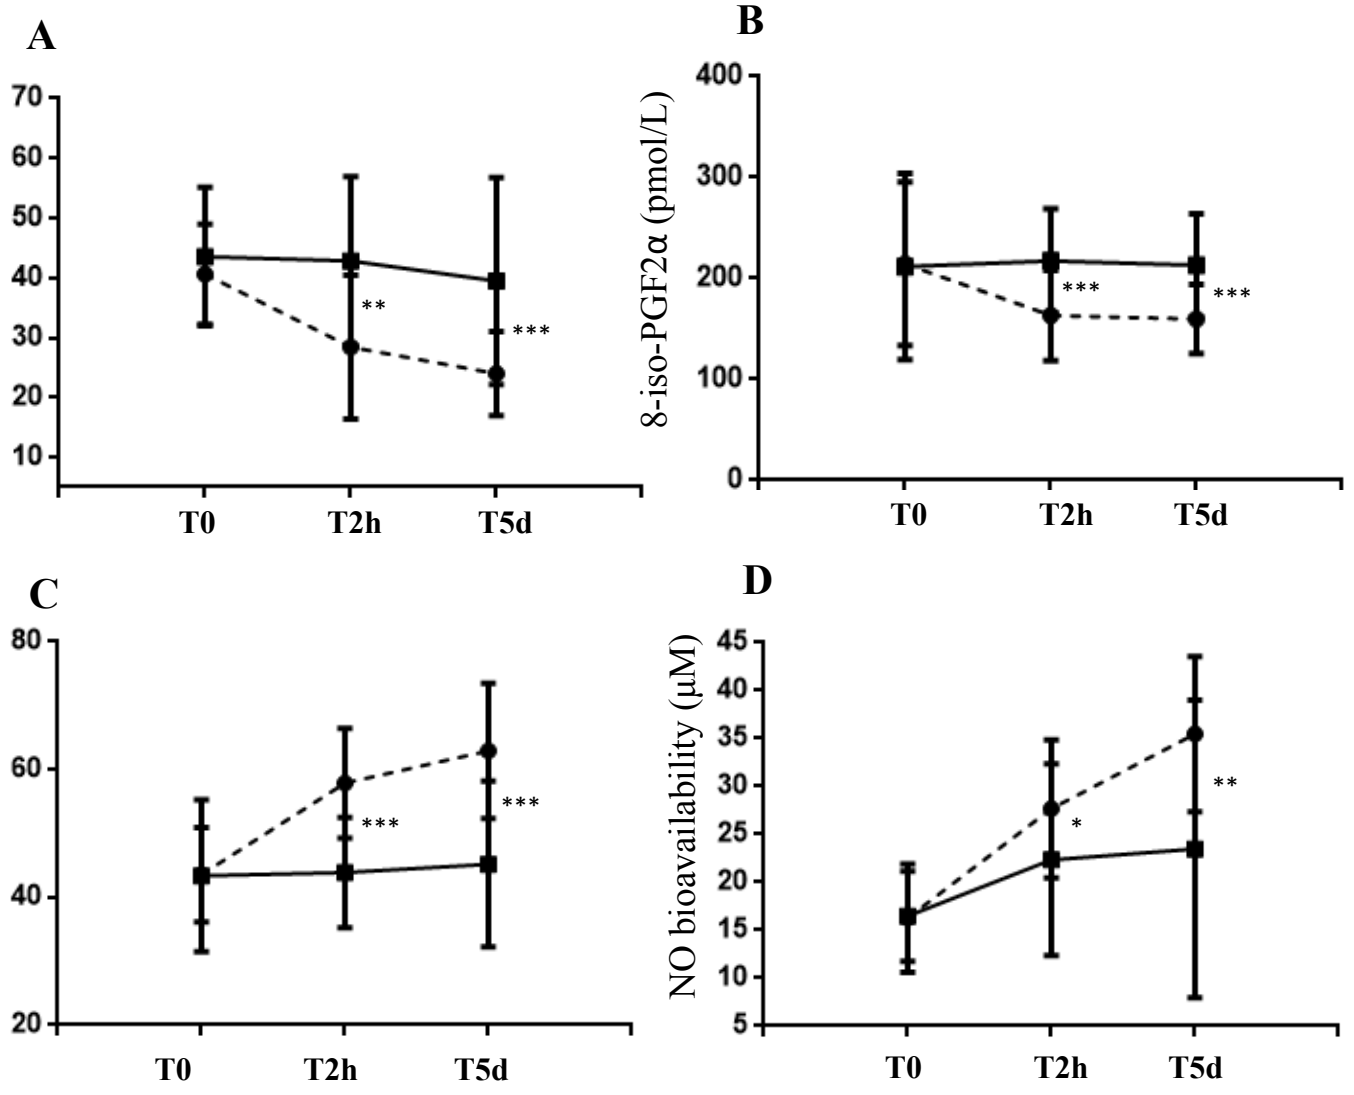

●--- GSH Treatment  
■--- Placebo Treatment

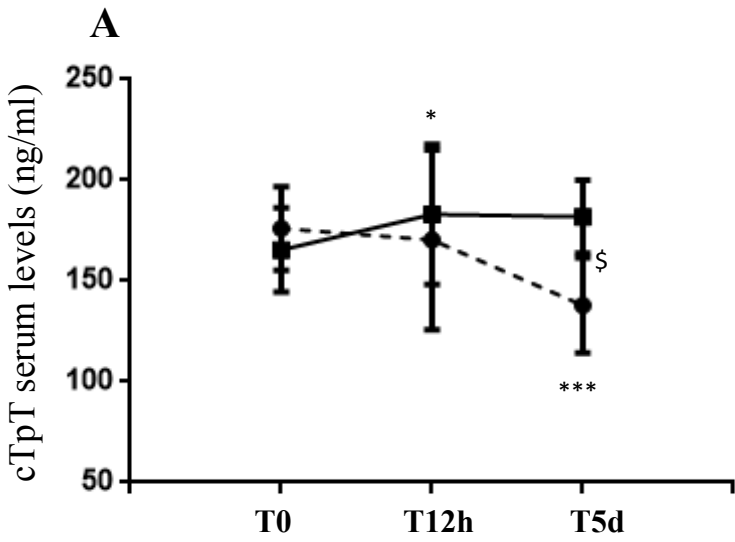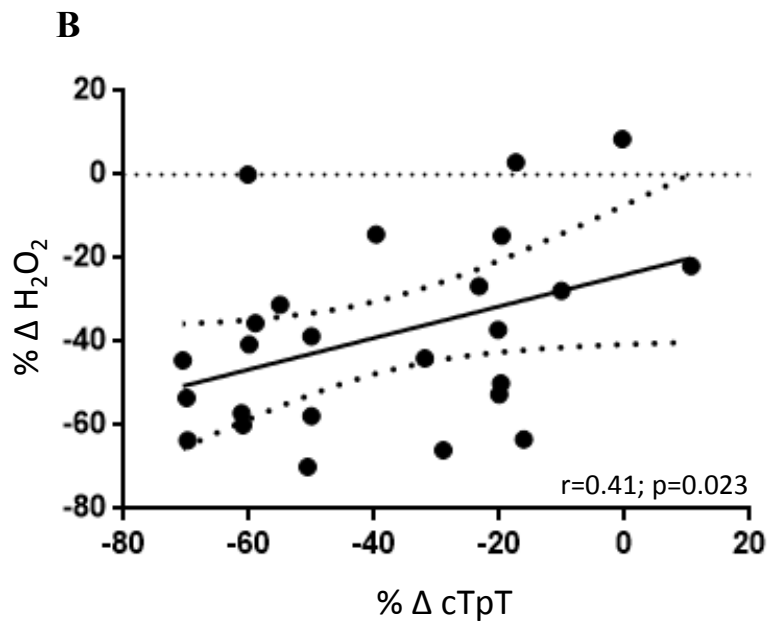

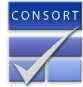

## CONSORT 2010 checklist of information to include when reporting a randomised trial\*

| Section/Topic                    | Item No | Checklist item                                                                                                                                                                              | Reported on page No |
|----------------------------------|---------|---------------------------------------------------------------------------------------------------------------------------------------------------------------------------------------------|---------------------|
| <b>Title and abstract</b>        |         |                                                                                                                                                                                             |                     |
|                                  | 1a      | Identification as a randomised trial in the title                                                                                                                                           | 1                   |
|                                  | 1b      | Structured summary of trial design, methods, results, and conclusions (for specific guidance see CONSORT for abstracts)                                                                     | 2                   |
| <b>Introduction</b>              |         |                                                                                                                                                                                             |                     |
| Background and objectives        | 2a      | Scientific background and explanation of rationale                                                                                                                                          | 4                   |
|                                  | 2b      | Specific objectives or hypotheses                                                                                                                                                           | 5                   |
| <b>Methods</b>                   |         |                                                                                                                                                                                             |                     |
| Trial design                     | 3a      | Description of trial design (such as parallel, factorial) including allocation ratio                                                                                                        | 6                   |
|                                  | 3b      | Important changes to methods after trial commencement (such as eligibility criteria), with reasons                                                                                          | NA                  |
| Participants                     | 4a      | Eligibility criteria for participants                                                                                                                                                       | 5                   |
|                                  | 4b      | Settings and locations where the data were collected                                                                                                                                        | 5                   |
| Interventions                    | 5       | The interventions for each group with sufficient details to allow replication, including how and when they were actually administered                                                       | 6                   |
| Outcomes                         | 6a      | Completely defined pre-specified primary and secondary outcome measures, including how and when they were assessed                                                                          | 6                   |
|                                  | 6b      | Any changes to trial outcomes after the trial commenced, with reasons                                                                                                                       | NA                  |
| Sample size                      | 7a      | How sample size was determined                                                                                                                                                              | NA                  |
|                                  | 7b      | When applicable, explanation of any interim analyses and stopping guidelines                                                                                                                | NA                  |
| <b>Randomisation:</b>            |         |                                                                                                                                                                                             |                     |
| Sequence generation              | 8a      | Method used to generate the random allocation sequence                                                                                                                                      | 6-7                 |
|                                  | 8b      | Type of randomisation; details of any restriction (such as blocking and block size)                                                                                                         | 6-7                 |
| Allocation concealment mechanism | 9       | Mechanism used to implement the random allocation sequence (such as sequentially numbered containers), describing any steps taken to conceal the sequence until interventions were assigned | NA                  |
| Implementation                   | 10      | Who generated the random allocation sequence, who enrolled participants, and who assigned participants to interventions                                                                     | 6-7                 |
| Blinding                         | 11a     | If done, who was blinded after assignment to interventions (for example, participants, care providers, those                                                                                | 6-7                 |

|    |                          |                                                                                                                     |               |
|----|--------------------------|---------------------------------------------------------------------------------------------------------------------|---------------|
| 1  |                          |                                                                                                                     |               |
| 2  |                          | assessing outcomes) and how                                                                                         |               |
| 3  |                          |                                                                                                                     |               |
| 4  |                          | 11b If relevant, description of the similarity of interventions                                                     | NA            |
| 5  | Statistical methods      | 12a Statistical methods used to compare groups for primary and secondary outcomes                                   | 8             |
| 6  |                          | 12b Methods for additional analyses, such as subgroup analyses and adjusted analyses                                | 8             |
| 7  |                          |                                                                                                                     |               |
| 8  | <b>Results</b>           |                                                                                                                     |               |
| 9  | Participant flow (a      | 13a For each group, the numbers of participants who were randomly assigned, received intended treatment, and        | 8             |
| 10 | diagram is strongly      | were analysed for the primary outcome                                                                               |               |
| 11 | recommended)             | 13b For each group, losses and exclusions after randomisation, together with reasons                                | NA            |
| 12 | Recruitment              | 14a Dates defining the periods of recruitment and follow-up                                                         | 5             |
| 13 |                          | 14b Why the trial ended or was stopped                                                                              | NA            |
| 14 | Baseline data            | 15 A table showing baseline demographic and clinical characteristics for each group                                 | 8 and Table 1 |
| 15 | Numbers analysed         | 16 For each group, number of participants (denominator) included in each analysis and whether the analysis was      | 8             |
| 16 |                          | by original assigned groups                                                                                         |               |
| 17 |                          |                                                                                                                     |               |
| 18 | Outcomes and             | 17a For each primary and secondary outcome, results for each group, and the estimated effect size and its           | 8 and 9       |
| 19 | estimation               | precision (such as 95% confidence interval)                                                                         |               |
| 20 |                          | 17b For binary outcomes, presentation of both absolute and relative effect sizes is recommended                     | 8 and 9       |
| 21 | Ancillary analyses       | 18 Results of any other analyses performed, including subgroup analyses and adjusted analyses, distinguishing       | NA            |
| 22 |                          | pre-specified from exploratory                                                                                      |               |
| 23 |                          |                                                                                                                     |               |
| 24 | Harms                    | 19 All important harms or unintended effects in each group (for specific guidance see CONSORT for harms)            | NA            |
| 25 |                          |                                                                                                                     |               |
| 26 | <b>Discussion</b>        |                                                                                                                     |               |
| 27 | Limitations              | 20 Trial limitations, addressing sources of potential bias, imprecision, and, if relevant, multiplicity of analyses | 11            |
| 28 | Generalisability         | 21 Generalisability (external validity, applicability) of the trial findings                                        | 12            |
| 29 | Interpretation           | 22 Interpretation consistent with results, balancing benefits and harms, and considering other relevant evidence    | 9-12          |
| 30 |                          |                                                                                                                     |               |
| 31 | <b>Other information</b> |                                                                                                                     |               |
| 32 | Registration             | 23 Registration number and name of trial registry                                                                   | 5             |
| 33 | Protocol                 | 24 Where the full trial protocol can be accessed, if available                                                      | 5             |
| 34 | Funding                  | 25 Sources of funding and other support (such as supply of drugs), role of funders                                  | NA            |
| 35 |                          |                                                                                                                     |               |

37 \*We strongly recommend reading this statement in conjunction with the CONSORT 2010 Explanation and Elaboration for important clarifications on all the items. If relevant, we also  
 38 recommend reading CONSORT extensions for cluster randomised trials, non-inferiority and equivalence trials, non-pharmacological treatments, herbal interventions, and pragmatic trials.  
 39 Additional extensions are forthcoming: for those and for up to date references relevant to this checklist, see [www.consort-statement.org](http://www.consort-statement.org).

# BMJ Open

## Glutathione infusion before primary percutaneous coronary intervention: a randomized controlled pilot study.

|                                 |                                                                                                                                                                                                                                                                                                                                                                                                                                                                                                                                                                                                                                                                                                                                                                                                                                                                                                                                                                                                                                                                                                                                                                                                                       |
|---------------------------------|-----------------------------------------------------------------------------------------------------------------------------------------------------------------------------------------------------------------------------------------------------------------------------------------------------------------------------------------------------------------------------------------------------------------------------------------------------------------------------------------------------------------------------------------------------------------------------------------------------------------------------------------------------------------------------------------------------------------------------------------------------------------------------------------------------------------------------------------------------------------------------------------------------------------------------------------------------------------------------------------------------------------------------------------------------------------------------------------------------------------------------------------------------------------------------------------------------------------------|
| Journal:                        | <i>BMJ Open</i>                                                                                                                                                                                                                                                                                                                                                                                                                                                                                                                                                                                                                                                                                                                                                                                                                                                                                                                                                                                                                                                                                                                                                                                                       |
| Manuscript ID                   | bmjopen-2018-025884.R1                                                                                                                                                                                                                                                                                                                                                                                                                                                                                                                                                                                                                                                                                                                                                                                                                                                                                                                                                                                                                                                                                                                                                                                                |
| Article Type:                   | Research                                                                                                                                                                                                                                                                                                                                                                                                                                                                                                                                                                                                                                                                                                                                                                                                                                                                                                                                                                                                                                                                                                                                                                                                              |
| Date Submitted by the Author:   | 14-Jan-2019                                                                                                                                                                                                                                                                                                                                                                                                                                                                                                                                                                                                                                                                                                                                                                                                                                                                                                                                                                                                                                                                                                                                                                                                           |
| Complete List of Authors:       | Tanzilli, Gaetano; University of Rome La Sapienza, Department of Heart and Great Vessels,<br>Truscelli, Giovanni; Sapienza University of Rome<br>Arrivi, Alessio; Department of Cardiology<br>Carnevale, Roberto; Sapienza University, I Clinica Medica<br>Placanica, Attilio; Department of Cardiology<br>Viceconte, Nicola; Università degli studi di Roma "La Sapienza", Dipartimento Cuore e Grossi Vasi<br>Raparelli, Valeria ; Sapienza University of Rome, I Clinica Medica, Department of Internal Medicine and Medical Specialties<br>Mele, Rita; Sapienza University<br>Cammisotto, Vittoria; Sapienza University, Department of Internal Medicine and Medical Specialties<br>Nocella, Cristina; IRCCS NeuroMed<br>Barillà, Francesco; Sapienza University , Department of the Heart and Great Vessels<br>Lucisano, Luigi; Department of Cardiology<br>Pennacchi, Mauro; Department of Cardiology<br>Granatelli, Antonino; Department of Cardiology<br>Dominici, Marcello; Department of Cardiology<br>Basili, Stefania; Sapienza University of Rome, I Clinica Medica<br>Gaudio, Carlo; University of Rome La Sapienza<br>Mangeri, Enrico; Sapienza University , Department of the Heart and Great Vessels |
| <b>Primary Subject Heading</b>: | Cardiovascular medicine                                                                                                                                                                                                                                                                                                                                                                                                                                                                                                                                                                                                                                                                                                                                                                                                                                                                                                                                                                                                                                                                                                                                                                                               |
| Secondary Subject Heading:      | Pharmacology and therapeutics                                                                                                                                                                                                                                                                                                                                                                                                                                                                                                                                                                                                                                                                                                                                                                                                                                                                                                                                                                                                                                                                                                                                                                                         |
| Keywords:                       | Glutathione, Reperfusion Injury, STEMI, hydrogen peroxide                                                                                                                                                                                                                                                                                                                                                                                                                                                                                                                                                                                                                                                                                                                                                                                                                                                                                                                                                                                                                                                                                                                                                             |
|                                 |                                                                                                                                                                                                                                                                                                                                                                                                                                                                                                                                                                                                                                                                                                                                                                                                                                                                                                                                                                                                                                                                                                                                                                                                                       |

SCHOLARONE™  
Manuscripts

1  
2  
3 1 **Glutathione infusion before primary percutaneous coronary intervention: a randomized**  
4  
5 2 **controlled pilot study.**

6  
7  
8 3 Gaetano Tanzilli<sup>1</sup>, Giovanni Truscelli<sup>1</sup>, Alessio Arrivi<sup>2</sup>, Roberto Carnevale<sup>3</sup>, Attilio Placanica<sup>4</sup>,  
9  
10 4 Nicola Viceconte<sup>1</sup>, Valeria Raparelli<sup>5</sup>, Rita Mele<sup>6</sup>, Vittoria Cammisotto<sup>7</sup>, Cristina Nocella<sup>8</sup>,  
11  
12 5 Francesco Barillà<sup>1</sup>, Luigi Lucisano<sup>4</sup>, Mauro Pennacchi<sup>4</sup>, Antonino Granatelli<sup>4</sup>, Marcello Dominici<sup>2</sup>,  
13  
14 6 Stefania Basili<sup>5</sup>, Carlo Gaudio<sup>1</sup> and Enrico Mangieri<sup>1</sup>

15  
16  
17 7  
18  
19 8 <sup>1</sup> Department of the Heart and Great Vessels, Sapienza University of Rome, Rome, Italy

20  
21 9 <sup>2</sup> Department of Cardiology, "Santa Maria" Hospital, Terni, Italy

22  
23  
24 10 <sup>3</sup> Department of Medical-Surgical Sciences and Biotechnologies, Sapienza University, Latina, Italy

25  
26 11 <sup>4</sup> Department of Cardiology, "San Giovanni Evangelista" Hospital, Tivoli, Italy

27  
28 12 <sup>5</sup> Department of Experimental Medicine, Sapienza University of Rome, Rome, Italy

29  
30 13 <sup>6</sup> Department of Surgical Sciences, Sapienza University, Rome, Italy

31  
32  
33 14 <sup>7</sup> Department of Internal Medicine and Medical Specialties, Sapienza University, Rome, Italy

34  
35 15 <sup>8</sup> IRCCS NeuroMed, Pozzilli (IS), Italy

36  
37  
38 16  
39  
40 17 **Corresponding Author:**

41  
42  
43 18 Gaetano Tanzilli, MD, Department of Heart and Great Vessels "Attilio Reale", Sapienza University  
44  
45 19 of Rome, Viale del Policlinico 155, 00161 Rome, Italy; +39 06 49973240

46  
47 20 [gaetano.tanzilli@uniroma1.it](mailto:gaetano.tanzilli@uniroma1.it)

48  
49 21  
50  
51 22 **Word count: 3186**

52  
53  
54 23

55  
56 24

57  
58 25

59  
60 26

## 1 **Abstract**

2 **Objective-** In the setting of reperfused ST-elevation myocardial infarction (STEMI), increased  
3 production of reactive oxygen species (ROS) contributes to reperfusion injury. Among ROS,  
4 hydrogen peroxide (H<sub>2</sub>O<sub>2</sub>) showed toxic effects on human cardiomyocytes and may induce  
5 microcirculatory impairment. Glutathione (GSH) is a water-soluble tripeptide with a potent oxidant  
6 scavenging activity. We hypothesized that the infusion of GSH before acute reoxygenation might  
7 counteract the deleterious effects of increased H<sub>2</sub>O<sub>2</sub> generation on myocardium.

8 **Methods-** Fifty consecutive STEMI patients scheduled to undergo primary angioplasty were  
9 randomly assigned, before intervention, to receive an infusion of GSH (2500 mg/25ml over 10 min)  
10 followed by drug administration at the same doses at 24, 48, 72 hours elapsing time or placebo.  
11 Peripheral blood samples were obtained before and at the end of procedure as well as after 5 days.  
12 H<sub>2</sub>O<sub>2</sub> production, 8-iso-PGF<sub>2</sub>α formation, H<sub>2</sub>O<sub>2</sub> breakdown activity (HBA) and nitric oxide (NO)  
13 bioavailability were determined. Serum cardiac-Troponin T (cTpT) was measured at admission and  
14 up to 5 days.

15 **Results-** Following acute reperfusion, a significant reduction of H<sub>2</sub>O<sub>2</sub> production (p=0.0015) and 8-  
16 iso-PGF<sub>2</sub>α levels (p=0.0003) as well as a significant increase in HBA (p<0.0001) and NO  
17 bioavailability (p=0.035) was found in the GSH group as compared with placebo. In treated  
18 patients, attenuated production of H<sub>2</sub>O<sub>2</sub> persisted up to 5 days from the index procedure (p=0.009)  
19 and these changes were linked to those of cTpT levels (r=0.41, p= 0.023).

20 **Conclusion** The prophylactic and prolonged infusion of GSH seems determined a rapid onset and  
21 persistent blunting of H<sub>2</sub>O<sub>2</sub> generation improving myocardial cell survival. Nevertheless, a larger  
22 trial, adequately powered for evaluation of clinical endpoints, is ongoing to confirm the current  
23 finding.

24  
25 **Key words:** Glutathione; STEMI; Reperfusion Injury; Reactive Oxygen Species; hydrogen  
26 peroxide, Percutaneous Coronary Interventions.



1  
2  
3 1 **Article summary**  
4

5 2 **Strengths and limitations of this study**  
6

- 7  
8 3 1. In patients who suffer from STEMI, acute reoxygenation of ischemic myocardium can  
9 induce additional myocardial cell injury mainly driven by heightened oxidative status.  
10 4  
11  
12 5 2. Reactive oxygen species (ROS) generation further contributes to damage myocardium by  
13 limiting bioavailability of nitric oxide at microcirculatory level.  
14 6  
15  
16  
17 7 3. This pilot study demonstrates that in the setting of STEMI reperfusion the rapid onset and  
18 prolonged antioxidant (scavenging) activity obtained by infusion of glutathione (GSH)  
19 8 protects the myocardium.  
20 9  
21  
22  
23  
24 10 4. This study is limited by the lack of clinical end points and the small sample size. Moreover,  
25 qualitative assessment of GSH-induced improvement of myocardial reperfusion indexes,  
26 11 might only represent the effect of a preserved microcirculatory responsiveness to vasoactive  
27 12 substances (i.e. NO) but unable to limit the expansion of myocardial cell damage.  
28  
29  
30  
31 13  
32  
33 14  
34  
35 15  
36  
37 16  
38  
39  
40 17  
41  
42 18  
43  
44 19  
45  
46  
47 20  
48  
49 21  
50  
51 22  
52  
53  
54 23  
55  
56 24  
57  
58 25  
59  
60 26

## 1 **Introduction**

2 It is well known that reactive oxygen species (ROS) are produced at an accelerated rate in tissues  
3 subjected to reperfusion and that the accumulation of ROS contributes to reperfusion injury during  
4 reintroduction of molecular oxygen to the ischemic environment.[1,2]

5 In the setting of ST-elevation myocardial infarction (STEMI), ROS-induced myocardial cell death  
6 occurs in the first few minutes of acute reoxygenation[3] and may continue for weeks to months by  
7 activation of apoptosis and autophagy processes.[4,5] ROS generation also contributes to structural  
8 capillary damage and endothelial dysfunction, which hinder the achievement of an optimal  
9 perfusion grade at microcirculatory level.[6,7] Over the time, this may result in adverse left  
10 ventricular (LV) remodeling and worse LV function.[8-10]

11 Among ROS, hydrogen peroxide ( $H_2O_2$ ) is produced by many enzymes including for example  
12 xanthine oxidase, lipoxygenase and, in particular, NADPH oxidase.[11]  $H_2O_2$  shows an important  
13 role in ischemia/reperfusion damage. In particular, the exposure of cultured human cardiomyocytes  
14 to  $H_2O_2$  has determined rapid onset and progressive oxidative cell death.[12] Moreover,  $H_2O_2$   
15 influences platelet activation and promotes vascular dysfunction through thromboxane  $A_2$  and  
16 isoprostanes formation, which are vasoconstrictors and powerful aggregating molecules derived  
17 from lipid peroxidation of esterified unsaturated fatty acids.[13-15]

18 Human possesses numerous enzymatic and non-enzymatic antioxidant systems. Among enzymatic  
19 system, glutathione peroxidase (GPx) plays an important role to prevent potentially deleterious  
20 effects of  $H_2O_2$ . [16] Thus, the reduced plasma level of glutathione (GSH), a water-soluble tripeptide  
21 with a potent oxidant scavenging activity and fundamental substrate for GPx activity, could have a  
22 key role in promoting myocardial and endothelial cell damage.[17] In fact, a decrease in myocardial  
23 GSH content has been observed during ischemia and reperfusion of the ischemic myocardium.[18]  
24 Despite robust evidences regarding the role of ROS in reperfusion injury, currently, in clinical  
25 practice, there are no treatments aimed at preventing ROS generation.

1  
2  
3  
4  
5  
6  
7  
8  
9  
10  
11  
12  
13  
14  
15  
16  
17  
18  
19  
20  
21  
22  
23  
24  
25  
26  
27  
28  
29  
30  
31  
32  
33  
34  
35  
36  
37  
38  
39  
40  
41  
42  
43  
44  
45  
46  
47  
48  
49  
50  
51  
52  
53  
54  
55  
56  
57  
58  
59  
60

1 Preclinical study of ischemia/reperfusion demonstrated that timely application of GSH provides  
2 better cardio-protection at higher doses [19]. Our hypothesis is that the use of GSH might  
3 counteract deleterious effect of augmented oxidant activity during reperfusion of STEMI [20].  
4 Currently, a glutathione solution is available for intravenous usage to reduce side effects of  
5 chemotherapy treatment for cancer with a tolerable safety profile, however it has never been tested  
6 in the setting of patients with STEMI.  
7 Therefore, we performed a pilot study to explore whether a short-term intravenous GSH  
8 administration, just before and after a primary percutaneous coronary intervention (p-PCI) in  
9 STEMI patients, was able to reduce oxidative stress and antioxidant status markers, resulting in a  
10 reduction of the myocardial damage.

## 12 **Methods**

### 13 **Study Design**

14 GSH2014 is a multicenter, no profit, randomized, double-blind, prospective, placebo-controlled  
15 trial. The Department of Heart and Great Vessel "A. Reale", Sapienza University of Rome, Italy  
16 was the coordinator center and designed the protocol (see Supplementary file). Two other centers,  
17 "Santa Maria" Terni Hospital and "San Giovanni Evangelista" Tivoli Hospital, both in Italy, were  
18 involved in the study as recruiting site.

19 The study has been planned according to principles of the declaration of Helsinki. Ethic Committee  
20 of the coordinator centre and Italian Medicines Agency (AIFA) (Date of Competent Authority  
21 Decision: 2015-01-13) authorized the study. Written informed consent was obtained from all  
22 patients enrolled. (<https://www.clinicaltrialsregister.eu/ctr-search/trial/2014-004486-25/IT#N>)

### 23 **Patient and Public Involvement**

24 Patients and or public were not involved in the different stages of the study (including the design  
25 and the recruitment phase). However, we intend to disseminate the main results to trial participants

1 and will seek patient and public involvement in the development of an appropriate method of  
2 dissemination.

### 3 **Study population and protocol**

4 Between March and August 2017, 157 consecutive STEMI patients, age >18 years, both sexes,  
5 referred to the three enrolling centers for primary percutaneous coronary intervention (p-PCI) were  
6 screened to enter in the study. Inclusion criteria were: typical chest pain lasting more than 30 min  
7 with pain onset <12 h, ST segment elevation >0.2 mV in at least two contiguous leads in the initial  
8 ECG, successful p-PCI (residual coronary stenosis <20%) and blood sampling for biochemical  
9 determinations collected prior to p-PCI.

10 Exclusion criteria were: symptoms duration > 12 h (n=15), rescue PCI (n=16), cardiogenic shock  
11 (n=3), left main disease (n=3), evidence of coronary collateral vessels (Rentrop score of 2 or 3 for  
12 the area at risk) (n=5), prior myocardial infarction (n=7), estimated glomerular filtration rate less  
13 than 30 ml/min (n=13), acute infection (n=2), treatment with systemic corticosteroids (n=4) or oral  
14 anticoagulants (n=7), malignancy (n=3), in-stent thrombosis (n=3), lack of consent to participate  
15 (n=18). Additionally, 8 patients were ineligible because no blood samples were collected before the  
16 start of procedure. Finally, a total of 50 patients were enrolled (see Figure 1- CONSORT diagram).  
17 The present analysis reported the results of the interim analysis (pre-planned in the protocol) on the  
18 acute effect of GSH infusion on markers of oxidative stress.

19 After percutaneous access was obtained, an intravenous bolus of 5.000 U of unfractionated heparin  
20 was administered, with sufficient supplements (if necessary) to maintain an activated clotting time  
21 (ACT)  $\geq$  250 seconds during interventions.

22 After baseline collection of peripheral blood samples, patients were randomized to an intravenous  
23 infusion of GSH (2500 mg/25 ml of Glutathione Sodium Salt, Biomedica Foscama Group, Rome,  
24 Italy) or placebo (saline solution) over 10 min before p-PCI. The two solutions appeared identical  
25 in size and colour to ensure blinding. Study participants, investigators and the laboratory staff

1  
2  
3 1 remained blinded until the statistical analysis was performed by an independent researcher who was  
4  
5 2 not involved in the study.

6  
7 3 Patients underwent p-PCI according to standard protocols. The use of thrombus aspiration,  
8  
9 4 glycoprotein IIb/IIIa inhibition was left to the discretion of the treating physician. Multivessel PCI  
10  
11 5 was performed in a staged fashion (7 to 10 days from index procedure).

12  
13  
14 6 All patients had drug-eluting stents implanted in treated vessels. After interventions, GSH was  
15  
16 7 infused at the same doses at 24, 48, 72 hours elapsing time. Further blood samples were obtained at  
17  
18 8 the end of procedure and 5 days from index procedure.

19  
20  
21 9 After 60'-90', a post-procedural 12 leads- ECG for ST measurement were performed.

22  
23  
24 10 Corrected TIMI frame count (cTFC) and TIMI myocardial perfusion grade (TMPG) were assessed  
25  
26 11 after pPCI as previously described [21]. An external Core Lab processed the data (G.P and G.P:  
27  
28 12 independent cardiologists). Digital angiograms were analyzed off-line with the use of an automated  
29  
30 13 edge detection system (Cardiovascular Medical System, MEDIS Imaging Systems, Leiden, the  
31  
32 14 Netherlands).

### 33 34 35 15 **Randomization and blinding**

36  
37  
38 16 An individual not involved in the study assigned codes (using a computer-generated random  
39  
40 17 sequence) to the study treatment with a random allocation of patients to an intravenous infusion of  
41  
42 18 GSH (2500 mg/25 ml over 10 min) or placebo (saline solution) before p-PCI. The interventional  
43  
44 19 cardiologists who performed p-PCI, those who analyzed digital angiograms and the laboratory  
45  
46 20 technicians were unaware of study treatment allocation.

### 47 48 49 21 **Primary Endpoint**

50  
51  
52 22 The primary endpoint was the change on oxidative stress markers levels after 2 hours from p-PCI in  
53  
54 23 patients treated with GSH as compared with placebo.

### 55 56 24 **Secondary Endpoints**

57  
58  
59 25 The secondary endpoints included the assessment of: (i) changes of oxidative stress markers levels  
60  
26 after 5 days from the p-PCI in patients received GSH or placebo; (ii) changes in serum cTnT,

1  
2  
3 1 biochemical markers of myocardial cell damage, in patients received GSH or placebo before and  
4  
5 2 after 5 days from the procedure.

### 3 **Peripheral blood samples**

4 Blood samples were drawn from antecubital vein, before the start of procedure and after stent  
5 deployment in all patients and then collected into tubes without anticoagulant or with 3.8% sodium  
6 citrate, lithium heparin and EDTA and centrifuged at 300×g for 10 min to obtain supernatant. All  
7 plasma and serum aliquots were stored at -80°C in appropriate cuvettes until assayed.

8 Markers of oxidative stress and antioxidant system (i.e. H<sub>2</sub>O<sub>2</sub>, H<sub>2</sub>O<sub>2</sub> breakdown activity (HBA) and  
9 8-iso-PGF<sub>2</sub>α) were analyzed in serum samples collected before p-PCI, 2 hours and 5 days after p-  
10 PCI. Due to the chemical properties of the oxidative stress markers, to avoid a long-time storage of  
11 blood samples and guarantee the laboratory test quality the analyses were performed within 6  
12 months from the collection.

13 Serum cardiac Troponin T (cTpT) was measured at admission, before the procedure, 6 and 12 hours  
14 after reperfusion, and thereafter once a day up to 5 days. Serum cTpT levels were measured using  
15 ELISA Kit (Elabsciences).

### 16 **H<sub>2</sub>O<sub>2</sub> production**

17 The H<sub>2</sub>O<sub>2</sub> was evaluated by a Colorimetric Detection Kit (Arbor Assays, Ann Arbor, Michigan, US)  
18 and expressed as μM. Intra-assay and inter-assay coefficients of variation were 2.1% and 3.7%,  
19 respectively.

### 20 **Determination of % HBA in peripheral serum**

21 The evaluation of the ability to detoxify H<sub>2</sub>O<sub>2</sub> was assessed by the analysis of **the HBA** in serum  
22 with HBA assay kit (Aurogene, Rome, Italy, code HPSA-50). The % of HBA was calculated  
23 according to the following formula: % of HBA = [(Ac-As) / Ac] X 100 where Ac is the absorbance  
24 of H<sub>2</sub>O<sub>2</sub> 1.4 mg/ml and As is the absorbance in the presence of the serum sample.

### 25 **Serum Nitric Oxide (NO) bioavailability**

1  
2  
3 1 A colorimetric assay kit (Cell Biolabs, San Diego, CA, US) was used to determine NO  
4  
5 2 bioavailability by measurement of the nitric oxide metabolites nitrite and nitrate (NO<sub>x</sub>) in the  
6  
7 3 serum. Intra-assay and inter-assay coefficients of variation were 2.9% and 1.7% respectively.

#### 4 **Serum 8-iso-Prostaglandin F<sub>2α</sub> formation**

5 Concentration of 8-iso-PGF<sub>2α</sub> in serum was measured by validated enzyme immunoassay (EIA)  
6 method (DRG International, Springfield, NJ, USA). Intra-assay and inter-assay coefficients of  
7 variation were 5.8% and 5.0% respectively. Values were expressed as pmol/L.

#### 8 **Myocardial function**

9 After 120 minutes and 5 days from the intervention, left ventricular end-diastolic volume  
10 (LVEDV), left ventricular end-systolic volume (LVESV) and ejection fraction (LVEF) were  
11 calculated by the biplane Simpson's rule, as recommended by the American Society of  
12 Echocardiography. The mean values of three measurements were used for statistical evaluation.

#### 13 **Sample Size Calculation**

14 For the present preliminary analysis, the sample size calculation was estimated considering previous  
15 data available for 8-iso-PGF<sub>2α</sub> levels [22]. We hypothesized a mean difference of 20% in plasmatic  
16 8-iso-PGF<sub>2-α</sub> levels measured at the end of successfully reperfusion when comparing the GSH  
17 group with the controls. We also assumed a SD of 50 pg/ml in each group. Based on these  
18 assumptions, this study needs 25 patients for each treatment arm for a power of ≥80% with a 2-  
19 sample t test at level 5%.

#### 20 **Statistical analysis**

21 Categorical variables were reported as counts (percentage) and continuous variables as means ±  
22 standard deviation (SD). We tested the independence of categorical variables by  $\chi^2$  test and the  
23 normal distribution of continuous variables by Kolmogorov-Smirnov test. We used Student paired  
24 and unpaired t test, repeated measure ANOVA and Pearson product-moment correlation analysis to  
25 evaluate normally distributed continuous variables. Appropriate nonparametric tests (Mann-  
26 Whitney U test, Wilcoxon rank test and Spearman rank correlation test) were employed for all the

1  
2  
3 1 other variables. As an overall nonparametric ANOVA, the Friedman test for the analysis of  
4  
5 2 intragroup variations was used. In cases of significance, we compared pair related samples using the  
6  
7 3 Wilcoxon test. The intergroup analysis was performed with the nonparametric Mann–Whitney U-  
8  
9 4 test. Only two-tailed probabilities were used for testing statistical significance. Probability values <  
10  
11 5 0.05 were regarded as statistically significant. All calculations were made with the computer  
12  
13 6 program STATISTICA 7 (StatSoft, Tulsa, OK, USA).  
14  
15  
16  
17 7

## 18 19 8 **Results**

20  
21 9 Twenty-five patients randomly received GSH and 25 placebo. All patients completed the phases of  
22  
23 10 the study (Figure 1). All patients had a TIMI flow grade equal to 0 or 1 requiring percutaneous  
24  
25 11 treatment. Clinical and angiographic characteristics of patients are shown in Table 1 and 2. The  
26  
27 12 baseline characteristics were well balanced between the two groups. In both groups, neither side  
28  
29 13 effects during the infusion, nor adverse events during the short observation period were recorded.  
30  
31

32  
33 14 **Oxidative stress, antioxidant status and vascular function in peripheral samples.** Biochemical  
34  
35 15 data are summarized in Table 3. Baseline H<sub>2</sub>O<sub>2</sub> and 8-iso-PGF<sub>2</sub>α levels were similar between  
36  
37 16 treated patients and controls. After PCI, a significant reduction of H<sub>2</sub>O<sub>2</sub> production and 8-iso-  
38  
39 17 PGF<sub>2</sub>α levels was observed in GSH group as compared to controls (**Figure 2A and 2B**). Moreover,  
40  
41 18 a significant increase in HBA and NO bioavailability was observed (**Figure 2C and 2D**).  
42  
43

44  
45 19 At the 5 days from index procedure, a persistent significant reduction of H<sub>2</sub>O<sub>2</sub> production and a  
46  
47 20 sustained increase in HBA and NO bioavailability was observed in the GSH group as compared  
48  
49 21 with controls (**Figure 2A-D**).  
50

51  
52 22 **Serological markers of myocardial injury.** Baseline cTpT mean values were similar between  
53  
54 23 GSH and placebo groups (176.0 ± 20.9 pg/ml vs. 165.4± 20.9 pg/ml, p=0.079). At 6 hours, no  
55  
56 24 changes in cTpT values were found in GSH-treated patients (172.1±27.7 pg/ml vs. baseline,  
57  
58 25 p=0.065). At 12 hours and 5 days after pPCI, GSH-treated patients showed a progressive decrease  
59  
60 26 of cTpT levels (170.0 ± 44.7 pg/ml and 137.9 ± 23.7 pg/ml; -21±23.1%, p=0.009 vs. baseline).



1  
2  
3  
4  
5  
6  
7  
8  
9  
10  
11  
12  
13  
14  
15  
16  
17  
18  
19  
20  
21  
22  
23  
24  
25  
26  
27  
28  
29  
30  
31  
32  
33  
34  
35  
36  
37  
38  
39  
40  
41  
42  
43  
44  
45  
46  
47  
48  
49  
50  
51  
52  
53  
54  
55  
56  
57  
58  
59  
60

Differently, a significant increase and persistence of high values of cTpT were observed in placebo group (T6,  $169.9 \pm 16.3$  pg/ml, T12,  $183.0 \pm 34.8$  pg/ml and T5d,  $181.9 \pm 18.0$  pg/ml;  $+12.4 \pm 23.1\%$ ,  $p=0.029$  vs. baseline) (**Figure 3A**). A modest correlation between percentage changes of  $H_2O_2$  and cTpT levels from baseline to 5 days was found in treated group (**Figure 3B**).

**Myocardial Reperfusion indexes.** Post-procedural cTFC values did not show a statistically significant reduction between treated and control groups ( $20.7 \pm 7.3$  vs.  $23.4 \pm 5.1$ ,  $p=0.156$ ). Interestingly, 6 patients (24%) in the placebo group and 15 (60%) patients in GSH group reached lower-risk ( $\leq 20$  frames/s) cTFC class ( $p=0.019$ ). After PCI,  $TMPG \geq 2$  was assessed in 21 patients (84%) and 14 patients (56%) of the GSH and placebo groups, respectively ( $p = 0.064$ ). Of note, 11 patients (44%) of the GSH group only had  $TMPG=3$  ( $p=0.0002$  vs. controls). Post-reperfusion cTFC values showed a significant correlation with changes of 8-iso-PGF $2\alpha$  ( $R=0.55$ ,  $p=0.012$ ) levels from baseline.

**Myocardial function.** Myocardial function was not different between groups after either baseline or at discharge. There was no significant difference between groups regarding LVEF, LVEDV or LVESV at any time point (Table 4).

## Discussion

This pilot study demonstrates that in the setting of STEMI reperfusion the rapid onset and prolonged antioxidant (scavenging) activity obtained by infusion of GSH before and after primary PCI reduces the oxidative stress markers. The improvement of the antioxidant status resulted in a significant decrease of cardiac troponin, marker of myocardial damage.

Data from experimental and clinical studies suggest that following reperfusion myocardial cells death largely contributes to the final infarct size.[23,24] On the other hand, the extent of damaged myocardium is the most important predictor of adverse ventricular remodeling and it is linearly dependent upon the amount of myocardial salvage by and after reperfusion. Thus, attenuation of pro-oxidant state is an important goal in cardioprotective interventions.[25]

1  
2  
3 1 Noteworthy, the serum of GSH treated patients showed a greater capacity to detoxify H<sub>2</sub>O<sub>2</sub>  
4  
5 2 evaluated by the HBA, an assay that measure the percentage of H<sub>2</sub>O<sub>2</sub> neutralized into the  
6  
7 3 samples.[26] We found an early and considerable increase of HBA, with positive effects on  
8  
9 4 myocardial cell survival, assessed by cTpT.

10  
11  
12 5 Current evidences demonstrate that oxidant environment promotes cardiomyocyte death in  
13  
14 6 the first few minutes of reflow suggesting the existence of a tight window of effective cardio-  
15  
16 7 protection.[27,28] Therefore, ROS-induced injury may continue for weeks to months as a result of  
17  
18 8 activation of programmed cell death. Our data have shown a persistent heightened oxidative status  
19  
20 9 along with decreased scavenging activity in untreated patients. This behavior makes the duration of  
21  
22 10 pharmacologic interventions a central point of cardio-protection strategies. In the present study,  
23  
24 11 GSH infusion, starting just before reperfusion with subsequent administration up to 3 days after,  
25  
26 12 promoted early and sustained increase of serum HBA with attenuated production of H<sub>2</sub>O<sub>2</sub> which  
27  
28 13 was highly related to progressive significant reduction of serological signs of myocardial injury. In  
29  
30 14 addition, our data show a progressive significant decrease of serum cTpT release during the 5 days  
31  
32 15 of reperfusion in the GSH-treated patients compared with the control group resulting in a 21%  
33  
34 16 reduction of myocardial damage. Despite that, in our population, the systolic function was not  
35  
36 17 different between groups after reperfusion, although a trend towards reduced LVEDV was observed  
37  
38 18 in treated patients. A possible explanation relies on the fact that inside the area at risk variable  
39  
40 19 amount of hibernated and stunned myocardium may coexist, thus affecting the prompt recovery of  
41  
42 20 contractility after reperfusion.[29]

43  
44  
45 21 Cells have a number of mechanisms for dealing with the toxic effects of oxygen. One of the  
46  
47 22 most important is connected with the widely distributed tripeptide thiol glutathione.[16,30] In  
48  
49 23 particular, the glutathione redox cycle is a more efficient antioxidant protective mechanism of the  
50  
51 24 heart, which acts by maintaining thiol groups of enzymes and other proteins in their reduced state  
52  
53 25 thus preventing cell membrane lipid peroxidation and limiting cardiomyocytes loss.[31]  
54  
55 26 Furthermore, in our study, a close relation between reduced myocardial reperfusion and increased  
56  
57  
58  
59  
60

1  
2  
3  
4  
5  
6  
7  
8  
9  
10  
11  
12  
13  
14  
15  
16  
17  
18  
19  
20  
21  
22  
23  
24  
25  
26  
27  
28  
29  
30  
31  
32  
33  
34  
35  
36  
37  
38  
39  
40  
41  
42  
43  
44  
45  
46  
47  
48  
49  
50  
51  
52  
53  
54  
55  
56  
57  
58  
59  
60

of 8-iso-PGF $2\alpha$  serum levels has been observed, suggesting that oxidative unbalance may be involved in microcirculation functional damage. As previously reported, impaired tissue-level perfusion develops within minutes of established acute revascularization of ischemic areas[32] and persists for at least 1 week.[33] In this context, there is robust evidence that ROS mediated isoprostanes production contributes importantly to the post-reperfusion microvascular impairment.[22,34] Current findings implement this observation by demonstrating a sustained production of isoprostanes up to 5 days after reperfusion thereby suggesting their contributory role in the pathogenesis and persistence of microvascular dysfunction that may affect myocardial cell survival. The infusion of GSH before and 24, 48, 72 hours after pPCI reduced isoprostanes serum levels and their reduction was linked to improvement of myocardial reperfusion indexes. Moreover, the increase in extracellular peroxide oxidants may reduce bioavailability of nitric oxide that is thought to contribute to promoting platelet hyperactivity and vasoconstriction.[13] In our study, GSH supplementation seems to have a role in preserving NO bioavailability and its vasodilator capacity at microcirculatory level.

### **The Strengths and Limitations of the Study**

The positive effects on reperfusion indexes and on biochemical signs of myocardial necrosis suggest the value of prophylactic and prolonged GSH administration in preventing reperfusion injury. Thus, in patients undergoing pPCI the infusion of a powerful antioxidant scavenger, such as GSH, may be useful to improve microcirculatory perfusion in order to further blunt the injury of myocardial cells.

### **Some limitations deserve to be discussed.**

The small sample size of the study and the lack of morfologic assessment of both infarct size and microvascular obstruction extent between the two groups, actually, limit the clinical application of these findings. Within a defined area at risk, the manifestations of ischemia-reperfusion vascular injury go from reversible functional impairments to irreversible structural damage and contribute to final amount of infarct myocardium. In absence of morphologic imaging, the qualitative evaluation

1  
2  
3 1 of GSH-induced improvement of myocardial reperfusion indexes, as assessed in our study, might  
4  
5 2 only represent the effect of a preserved microcirculatory responsiveness to vasoactive substances  
6  
7  
8 3 (i.e. NO) but unable to limit the expansion of myocardial cell damage. Indeed, other mechanisms,  
9  
10 4 such as interstitial edema and inflammatory reaction, which induce a sustained impairment of  
11  
12 5 microvascular perfusion, may primarily act to increase the amount of irreversible injured  
13  
14 6 myocardium thus promoting adverse ventricular remodeling.

15  
16  
17 7 In conclusion, in this pilot study, we have shown that a short-term prophylactic GSH  
18  
19 8 infusion mitigates the negative effects of the excessive and persistent H<sub>2</sub>O<sub>2</sub> formation on myocardial  
20  
21 9 cells. The findings of the present study require to be confirmed through an adequately powered  
22  
23  
24 10 STEMI population. A larger trial with a prolonged follow-up for evaluation of clinical endpoints is  
25  
26 11 needed to confirm the role of GSH administration as cardioprotective therapy.

1  
2  
3 1  
4 2  
5 3 **Figure Legend**  
6 4  
7 5  
8  
9

10 6 **Figure 1. CONSORT flowchart**  
11  
12 7  
13

14 8 **Figure 2.** H<sub>2</sub>O<sub>2</sub> production (A), 8-iso-PGF<sub>2</sub>α formation (B), hydrogen peroxide breakdown activity  
15 9 (HBA) (C) and NO bioavailability (D) at baseline, after 2 hours (T2h) and at the 5 days (T5d) from  
16  
17 10 the PCI in patients received GSH (n=25, dashed line) or placebo (n=25, continuous line).  
18  
19

20  
21 11 Data are expressed as mean±SEM (\*\*\*p <0.001, \*\*p <0.01, \*p <0.05).  
22  
23

24 12  
25  
26 13 **Figure 3.** cT<sub>p</sub>T levels (A) at baseline, after 6 hours (T6h), 12 hours (T12h) and at the 5 days (T5d)  
27  
28 14 from the PCI in patients received GSH (n=25, dashed line) or placebo (n=25, continuous line). Data  
29  
30 15 are expressed as mean±SEM (\*\*\*p<0.0001 vs. T0, \*p<0.05 vs. T0, \$p<0.05 between groups).  
31  
32

33 16 Linear correlation between % Δ cT<sub>p</sub>T and % Δ H<sub>2</sub>O<sub>2</sub> in GSH treated group (B).  
34  
35  
36 17  
37  
38 18  
39  
40 19  
41  
42  
43 20  
44  
45 21  
46  
47  
48 22  
49  
50 23  
51  
52  
53 24  
54  
55 25  
56  
57  
58 26  
59  
60 27

1  
2  
3 1  
4  
5  
6 2  
7  
8 3  
9  
10 4 **Contributors**

11  
12 5 GTa, EM led on the conception, design and writing of the study with substantial contributions to the  
13  
14 6 design, writing, critical review of intellectual content; GTr, AA, AP, NV, RM, enrollment of  
15  
16 7 patients; RC, VC, CN, provided laboratory analyses; VR, SB, provided further essential statistical  
17  
18 8 advice and expertise on the study protocol; FB, LL, MP, CG, providing expert clinical support;  
19  
20 9 AG, MD, made substantial contributions to the trial design and management.  
21  
22

23  
24 10 **Ethics and dissemination**

25  
26 11 Italian Medicines Agency (AIFA) authorization and single Ethic Committee approval has been  
27  
28 12 obtained for all the centers participating the study. Dissemination of results will be via peer-  
29  
30 13 reviewed research publications both online and in print, conference presentations, posters, patient  
31  
32 14 forums and Trust bulletins.  
33  
34

35 15 **Data Availability Statement**

36  
37 16 The data set is available on request from the corresponding author.  
38  
39

40 17 **Conflicts of Interest**

41  
42 18 Authors declare that there are not conflicts of interest.  
43

44 19 **Funding Source:** No funding declared  
45

46 20 **Acknowledgement:** The Authors thank dr. Gennaro Petriello and dr. Gaetano Pero for performing  
47  
48 21 the external assessment of angiographic data (Core Lab)  
49  
50  
51 22  
52  
53 23  
54  
55 24  
56  
57 25  
58  
59 26  
60  
27

1  
2  
3 1  
4  
5 2  
6  
7 3  
8  
9 4  
10  
11 5  
12  
13 6  
14  
15 7  
16  
17 8  
18  
19 9  
20  
21 10  
22 11  
23  
24 12  
25  
26 13  
27  
28 14  
29 15  
30  
31 16  
32  
33 17  
34  
35 18  
36  
37 19  
38  
39 20  
40  
41 21  
42  
43 22  
44  
45 23  
46  
47 24  
48  
49 25  
50  
51 26  
52  
53 27  
54  
55 28  
56  
57 29  
58  
59 30  
60

## References

- 1 Yellon DM, Hausenloy DJ. Myocardial reperfusion injury. *N Engl J Med* 2007;357:1121-35.
- 2 Zhu X, Zuo L, Cardounel AJ, et al. Characterization of in vivo tissue redox status, oxygenation, and formation of reactive oxygen species in postischemic myocardium. *Antioxid Redox Signal* 2007;9:447-455.
- 3 Grill HP, Zweier JL, Kuppusamy P, et al. Direct measurement of myocardial free radical generation in an in vivo model: effects of postischemic reperfusion and treatment with human recombinant superoxide dismutase. *J Am Coll Cardiol* 1992;20:1604-1611.
- 4 McCully JD, Wakiyama H, Hsieh YJ, et al. Differential contribution of necrosis and apoptosis in myocardial ischemia-reperfusion injury. *Am J Physiol*. 2004;286:H1923-H1935.
- 5 Dong Y, Undyala VV, Gottlieb RA, et al. Autophagy: definition, molecular machinery, and potential role in myocardial ischemia-reperfusion injury. *J Cardiovasc Pharmacol Ther* 2010;15:220-230.
- 6 Ørn S, Manhenke C, Greve OJ, et al. Microvascular obstruction is a major determinant of infarct healing and subsequent left ventricular remodelling following primary percutaneous coronary intervention. *Eur Heart J* 2009;30:1978-1985.
- 7 Heusch G, Kleinbongard P, Skyschally A. Myocardial infarction and coronary microvascular obstruction: an intimate, but complicated relationship. *Basic Res Cardiol* 2013;108:380.
- 8 Bax M, de Winter RJ, Schotborgh CE, et al. Short- and long-term recovery of left ventricular function predicted at the time of primary percutaneous coronary intervention in anterior myocardial infarction. *J Am Coll Cardiol* 2004;43:534-541.

- 1  
2  
3 1 9 Araszkiwicz A, Grajek S, Lesiak M, et al. Effect of impaired myocardial reperfusion on left  
4  
5 2 ventricular remodeling in patients with anterior wall acute myocardial infarction treated with  
6  
7 3 primary coronary intervention. *J Cardiol* 2006;98:725-728.  
8  
9  
10 4 10 Ndrepepa G, Tiroch K, Fusaro M, et al. 5-year prognostic value of no-reflow phenomenon after  
11  
12 5 percutaneous coronary intervention in patients with acute myocardial infarction. *J Am Coll Cardiol*  
13  
14 6 2010;55:2383-2389.  
15  
16  
17 7 11 Byon CH, Heath JM, Chen Y. Redox signaling in cardiovascular pathophysiology: A focus on  
18  
19 8 hydrogen peroxide and vascular smooth muscle cells. *Redox Biol* 2016;9:244-253.  
20  
21  
22 9 12 Tanimoto T, Parseghian MH, Nakahara T, et al. Cardioprotective effects of HSP72  
23  
24 10 administration on ischemia-reperfusion injury. *J Am Col Cardiol* 2017;70:1479-1492.  
25  
26 11 13 Pignatelli P, Pulcinelli FM, Lenti L, et al. Hydrogen peroxide is involved in collagen-induced  
27  
28 12 platelet activation. *Blood* 1998;91:484-90.  
29  
30  
31 13 14 Freedman JE. Oxidative stress and platelets. *Arterioscler Thromb Vasc Biol* 2008;28:11-6.  
32  
33 14 15 Basili S, Pignatelli P, Tanzilli G, et al. Anoxia-reoxygenation enhances platelet ThromboxaneA2  
34  
35 15 production via Reactive Oxidant Species-generated NOX2: effect in patients undergoing elective  
36  
37 16 percutaneous coronary intervention. *Arterioscler Thromb Vasc Biol* 2011;31:1766-1771.  
38  
39  
40 17 16 Takebe G, Yarimizu J, Saito Y, et al. A comparative study on the hydroperoxide and thiol  
41  
42 18 specificity of the glutathione peroxidase family and seleno-protein P. *J Biol Chem* 2002;277:41254-  
43  
44 19 41258.  
45  
46  
47 20 17 Jin RC, Mahoney CE, Anderson LC, et al. Glutathione peroxidase-3 deficiency promotes  
48  
49 21 platelet-dependent thrombosis in vivo. *Circulation* 2011;123:1963-1973.  
50  
51  
52 22 18 Singh A, Lee KJ, Lee CY, et al. Relation between myocardial glutathione content and extent of  
53  
54 23 ischemia-reperfusion injury. *Circulation* 1989;80:1795-1804.  
55  
56 24 19 Hinkel R, Boekstegers P, Kupatt C. Adjuvant early and late cardioprotective therapy: access to  
57  
58 25 the heart. *Cardiovasc Res.* 2012;94(2):226-36.  
59  
60



- 1  
2  
3 1 20 Truscelli G, Tanzilli G, Viceconte N, et al. Glutathione sodium salt as a novel adjunctive  
4  
5 2 treatment for acute myocardial infarction. *Med Hypotheses* 2017;102:48-50.  
6  
7  
8 3 21 Henriques JP, Zijlstra F, van 't Hof AW, et al. Angiographic assessment of reperfusion in acute  
9  
10 4 myocardial infarction by myocardial blush grade. *Circulation* 2003;107:2115-2119.  
11  
12  
13 5 22 Basili S, Tanzilli G, Mangieri E, et al. Intravenous Ascorbic Acid Infusion Improves Myocardial  
14  
15 6 Perfusion Grade During Elective Percutaneous Coronary Intervention. Relationship With Oxidative  
16  
17 7 Stress Markers. *J Am Coll Cardiol Intv* 2010;3:221-229.  
18  
19  
20 8 23 Brener SJ, Maehara A, Dizon JM, et al. Relationship between myocardial reperfusion, infarct  
21  
22 9 size, and mortality. *J Am Coll Cardiol* 2013;6:718-724.  
23  
24 10 24 Musiolik J, van Caster P, Skyschally A, et al. Reduction of infarct size by gentle reperfusion  
25  
26 11 without activation of reperfusion injury salvage kinases in pigs. *Cardiovasc Res* 2010;85:110-117.  
27  
28  
29 12 25 Hausenloy DJ, Garcia-Dorado D, Bøtker HE, et al. Novel targets and future strategies for acute  
30  
31 13 cardioprotection: position paper of the European Society of cardiology working group on cellular  
32  
33 14 biology of the heart. *Cardiovasc Res* 2017; 113:564-585.  
34  
35  
36 15 26 Carnevale R, Nocella C, et al. Blood hydrogen peroxide break-down activity in healthy subjects  
37  
38 16 and in patients at risk of cardiovascular events. *Atherosclerosis* 2018;274:29-34.  
39  
40  
41 17 27 Piper HM, Abdallah Y, Schäfer C. The first minutes of reperfusion: a window of opportunity for  
42  
43 18 cardioprotection. *Cardiovasc Res* 2004;61:365-71.  
44  
45 19 28 Zhu X, Zuo L. Characterization of oxygen radical formation mechanism at early cardiac  
46  
47 20 ischemia. *Cell Death and Disease* 2013;4:e787.  
48  
49  
50 21 29 Bolli R, Marban E. Molecular and cellular mechanisms of myocardial stunning. *Physiol Rev*  
51  
52 22 1999;79:609-634.  
53  
54 23 30 Freedman JE, Frei B, Welch GN, et al. Glutathione peroxidase potentiates the inhibition of  
55  
56 24 platelet function by S-nitrosothiols. *J Clin Invest* 1995;96:394-400.  
57  
58  
59 25 31 Meister A. Glutathione-Ascorbic Acid Antioxidant System in Animals. *J Biol Chem*  
60  
26 1994;269:9397-9400.

1  
2  
3  
4  
5  
6  
7  
8  
9  
10  
11  
12  
13  
14  
15  
16  
17  
18  
19  
20  
21  
22  
23  
24  
25  
26  
27  
28  
29  
30  
31  
32  
33  
34  
35  
36  
37  
38  
39  
40  
41  
42

- 1 32 Reffelmann T, Kloner RA. Microvascular reperfusion injury: rapid expansion of anatomic no  
2 reflow during reperfusion in the rabbit. *Am J Physiol Heart Circ Physiol* 2002;283:H1099-H1107.
- 3 33 Rochitte CE, Lima JA, Bluemke DA, et al. Magnitude and time course of microvascular  
4 obstruction and tissue injury after acute myocardial infarction. *Circulation* 1998;98:1006-1014.
- 5 34 Yaqin X, Huo Y, Toufektsian MC, et al. Activated platelets contribute importantly to myocardial  
6 reperfusion injury. *Am J Physiol Heart Circ Physiol* 2006;290:H692-H699.

For peer review only

**Table 1. Clinical characteristics of the study population**

| Variables                             | GSH group<br>(n=25) | Placebo group<br>(n=25) | P value |
|---------------------------------------|---------------------|-------------------------|---------|
| <b>Age</b> (y, mean±SD)               | 66 ± 10.7           | 66.9 ± 9.1              | 0.74    |
| <b>Male</b> , n (%)                   | 15 (60)             | 13 (52)                 | 0.98    |
| <b>Body-mass index</b> §<br>(mean±SD) | 26.9 ± 3.9          | 20 ± 3.8                | 0.38    |
| <b>Killip class ≥ 3</b> ,<br>n (%)    | 2 (8)               | 0 (0)                   | 0.47    |
| <b>Diabetes Mellitus</b> , n<br>(%)   | 5 (20)              | 5 (20)                  | 1       |
| <b>Hypertension</b> , n (%)           | 14 (56)             | 17 (68)                 | 0.56    |
| <b>Dyslipidemia</b> , n (%)           | 11 (44)             | 13 (52)                 | 0.77    |
| <b>Statin use</b> , n (%)             | 8 (32)              | 8 (32)                  | 1       |
| <b>Smokers</b> , n (%)                | 17 (68)             | 13 (52)                 | 0.38    |

§ The body-mass index is the weight in kilograms divided by the square of the height in meters.

**Table 2. Angiographic parameters**

| Variables                                            | GSH group<br>(n=25) | Placebo group<br>(n=25) | P value |
|------------------------------------------------------|---------------------|-------------------------|---------|
| <b>Ischemia time#</b><br>(min; mean $\pm$ SD)        | 286 $\pm$ 88        | 270 $\pm$ 96            | 0.85    |
| <b>Thrombus Burden <math>\geq</math> 3,</b><br>n (%) | 12 (48)             | 11 (44)                 | 0.77    |
| <b>Thrombus aspiration, n</b><br>(%)                 | 13 (52)             | 12 (48)                 | 0.87    |
| <b>GP IIb/IIIa inhibitors,</b><br>n (%)              | 2 (8)               | 3 (12)                  | 0.63    |
| <b>MVD, n (%)</b>                                    | 13 (52)             | 11 (44)                 | 0.77    |
| <b>2 vessels,</b>                                    | 8 (32)              | 5 (20)                  | 0.89    |
| <b>3 vessels,</b>                                    | 5 (20)              | 6 (24)                  |         |
| <b>Staged PCI, n (%)</b>                             | 9 (36)              | 5 (20)                  |         |
| <b>IRA:</b>                                          |                     |                         |         |
| <b>LAD, n (%)</b>                                    | 10 (40)             | 9 (36)                  | 0.77    |
| <b>LCx, n (%)</b>                                    | 5 (20)              | 6 (24)                  | 0.73    |
| <b>RCA, n (%)</b>                                    | 10 (40)             | 10 (40)                 | 1       |

**PCI** = percutaneous coronary intervention; **IRA** = infarct related coronary artery; **LAD** = left anterior descending coronary artery; **LCx** = left circumflex coronary artery; **RCA** = Right coronary artery. #ischemia time was defined as the timing between symptom onset and balloon inflation.

1  
2  
3 1  
4 2  
5 3  
6 4  
7 4  
8 5  
9 6  
10 7  
11 8  
12 9  
13 10  
14 11  
15 12

**Table 3. Biochemical data**

|                                                     | Baseline   |            |       | Reperfusion 2h |            |        | Follow-up (5 days) |            |        |
|-----------------------------------------------------|------------|------------|-------|----------------|------------|--------|--------------------|------------|--------|
| Variable                                            | GSH        | Placebo    | p     | GSH            | Placebo    | p      | GSH                | Placebo    | p      |
| <b>H<sub>2</sub>O<sub>2</sub></b><br>μM,<br>mean±SD | 40.6±8.4   | 43.6±11.6  | 0.305 | 28.4±12        | 42.8±14.1  | 0.0003 | 24±7               | 39.5±17.3  | 0.0001 |
| <b>Δ</b>                                            |            |            |       | -12.1±15.2     | -0.7±17.9  | 0.03   | -16.6±11.0         | -4.1±20.14 | 0.009  |
| <b>8-iso-PGF2α</b><br>pmol/L,<br>mean±SD            | 214.6±81.1 | 211.9±92.1 | 0.91  | 163.6±44.7     | 217.6±51.6 | 0.0003 | 159.9±34.2         | 213.1±50.9 | 0.0001 |
| <b>Δ</b>                                            |            |            |       | -50.9±92.9     | -3.3±1.29  | 0.02   | -54.6±62.1         | -1.2±115.7 | 0.02   |
| <b>HBA</b><br>%,<br>mean±SD                         | 43.6±7.4   | 43.4±11.9  | 0.94  | 57.9±8.6       | 43.9±8.7   | 0.0001 | 62.9±10.5          | 45.2±13.0  | 0.0001 |
| <b>Δ</b>                                            |            |            |       | +14.9±5.5      | +0.4±14.9  | 0.0004 | +19.4±10.2         | +1.8±17.1  | 0.0001 |
| <b>NO</b><br>μM,<br>mean±SD                         | 16.3±5.7   | 16.5±4.7   | 0.89  | 27.7±7.2       | 22.4±10    | 0.0356 | 35.5±8.1           | 23.5±15.5  | 0.0013 |
| <b>Δ</b>                                            |            |            |       | +11.4±6.8      | +5.8±10.5  | 0.05   | +19.2±9.7          | +7.0±14.7  | 0.002  |

GSH = reduced Glutathione; H<sub>2</sub>O<sub>2</sub> = Hydrogen Peroxide; 8-iso-PGF2α = 8-iso-Prostaglandin-F2α;

HBA = H<sub>2</sub>O<sub>2</sub> break-down activity

58  
59  
60

**Table 4. Left Ventricular echocardiographic parameters at baseline and at follow-up**

| Echo parameters                 | Placebo<br>(n= 25) | GSH<br>(n=25) | P-value |
|---------------------------------|--------------------|---------------|---------|
| <b>Baseline</b>                 |                    |               |         |
| <b>LVEDV (mL/m<sup>2</sup>)</b> | 121.3 ± 17.2       | 124.4 ± 22.3  | 0.44    |
| <b>LVESV (mL/m<sup>2</sup>)</b> | 65.4 ± 11.3        | 66.3± 13.2    | 0.91    |
| <b>LVEF (%)</b>                 | 47.5 ± 4.9         | 46.9 ± 4.8    | 0.42    |
| <b>Follow-up</b>                |                    |               |         |
| <b>LVEDV (mL/m<sup>2</sup>)</b> | 118.1 ± 17.8       | 113.2 ± 14.1  | 0.42    |
| <b>LVESV (mL/m<sup>2</sup>)</b> | 60.9 ± 10.7        | 58.8± 12.5    | 0.91    |
| <b>LVEF (%)</b>                 | 49.1 ± 3.2         | 49.8 ± 3.7    | 0.42    |

**LVEDV** = left ventricular end-diastolic volume; **LVEDSV** = left ventricular end-systolic volume; **LVEF** = left ventricular ejection fraction-diastolic volume

1  
2  
3  
4  
5  
6  
7  
8  
9  
10  
11  
12  
13  
14  
15  
16  
17  
18  
19  
20  
21  
22  
23  
24  
25  
26  
27  
28  
29  
30  
31  
32  
33  
34  
35  
36  
37  
38  
39  
40  
41  
42  
43  
44  
45  
46  
47  
48  
49  
50  
51  
52  
53  
54  
55  
56  
57  
58  
59  
60

For peer review only

1  
2  
3  
4  
5  
6  
7  
8  
9  
10  
11  
12  
13  
14  
15  
16  
17  
18  
19  
20  
21  
22  
23  
24  
25  
26  
27  
28  
29  
30  
31  
32  
33  
34  
35  
36  
37  
38  
39  
40  
41  
42  
43  
44  
45  
46  
47  
48  
49  
50  
51  
52  
53  
54  
55  
56  
57  
58  
59  
60

CONSORT flowchart

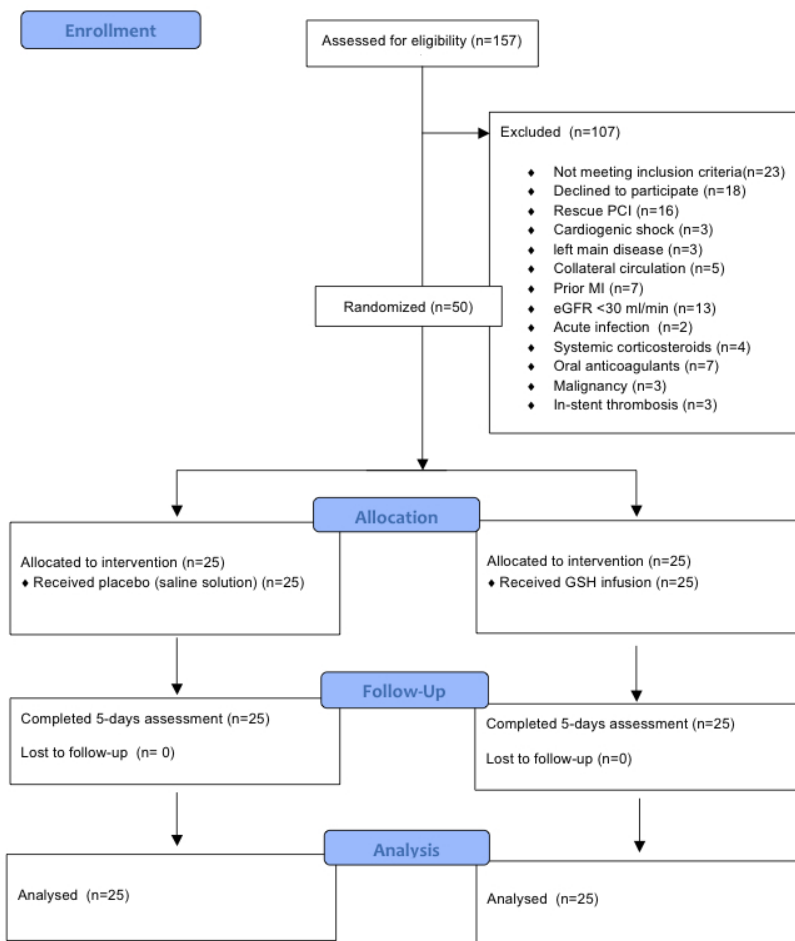

254x338mm (72 x 72 DPI)



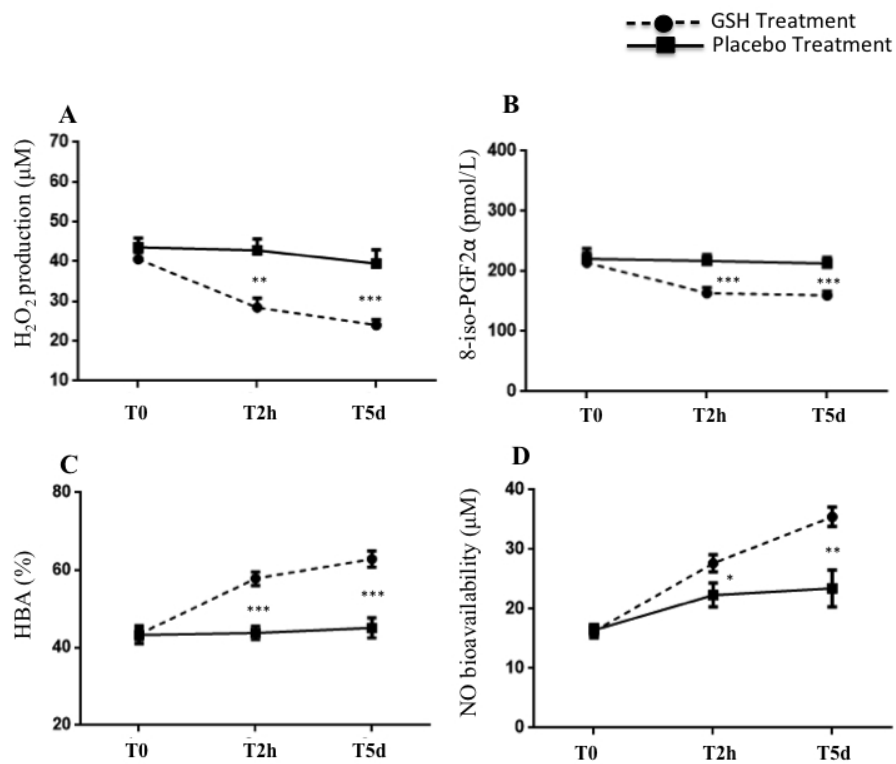

254x338mm (72 x 72 DPI)

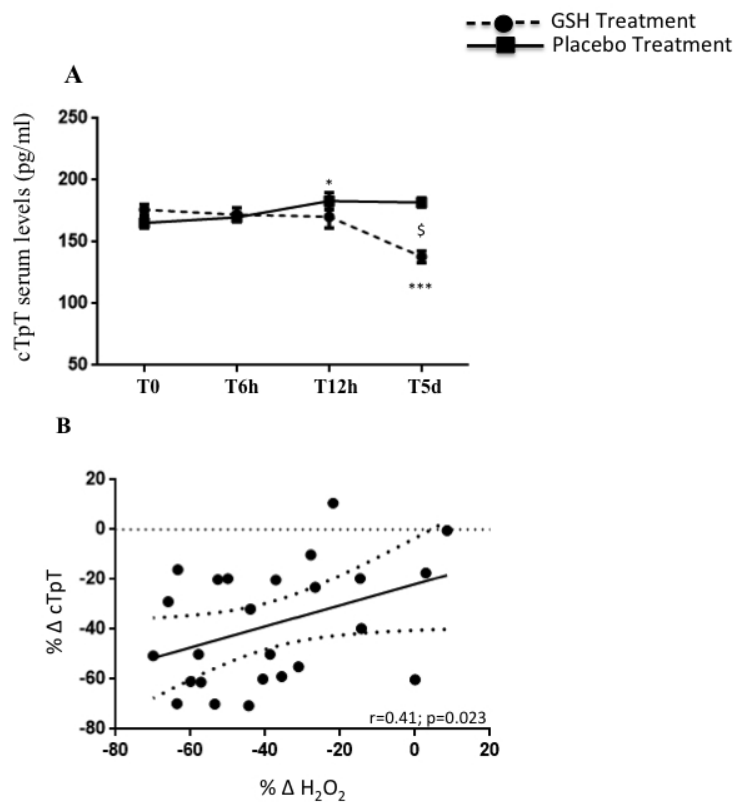

254x338mm (72 x 72 DPI)

1  
2  
3 **EudraCT Number: 2014-004486-25**

4 **Sponsor's Protocol Code Number: GSH2014**

5 National Competent Authority: Italy - Italian Medicines Agency

6 Clinical Trial Type: EEA CTA

7 Trial Status: submitted data of the pilot study. The trial is ongoing.

8 Date on which this record was first entered in the EudraCT database: 2014-12-04

9 Link: <https://www.clinicaltrialsregister.eu/ctr-search/trial/2014-004486-25/IT/>

10  
11  
12  
13 **A. Protocol Information**

14 Member State Concerned: Italy - Italian Medicines Agency

15 EudraCT number: 2014-004486-25

16 Full title of the trial: Prevention of the reperfusion myocardial damage in patients with acute  
17 myocardial infarct (STEMI) submitted to primary PCI through infusion of intravenous glutathione.

18 Sponsor's protocol code number: GSH2014

19  
20  
21 **B. Sponsor Information**

22 Sponsor 1: University Hospital "Policlinico Umberto I"

23 Name of organization providing support: University Hospital "Policlinico Umberto I", Rome, Italy.

24 Functional name of contact point: Enrico Mangieri, University Hospital "Policlinico Umberto I".

25 Viale del Policlinico, 155 – Rome, Post code: 00161, Italy

26 E-mail: [enrico.mangieri@uniroma1.it](mailto:enrico.mangieri@uniroma1.it)

27  
28  
29 **D. IMP Identification**

30 *IMP to be used in the trial has a marketing authorisation: Yes*

31 *Trade name: TAD*

32 Name of the Marketing Authorisation holder: Biomedica Foscama Group S.p.A.

33 Country which granted the Marketing Authorisation: Italy

34 Pharmaceutical form: Powder and solvent for solution for infusion

35 Routes of administration for this IMP: Intravenous use

36 *Information on Placebo*

37 Pharmaceutical form of the placebo: saline solution

38 Route of administration of the placebo: Intravenous use

39  
40  
41  
42 **E. General Information on the Trial**

43 Medical condition or disease under investigation

44 Medical condition(s) being investigated: ST-Segment Elevation Myocardial Infarction (STEMI).

45 Medical condition in easily understood language: acute myocardial infarct

46 Therapeutic area: Diseases [C] - Cardiovascular Diseases [C14]

47 Objective of the trial

48 Main objective of the trial: To verify if the intravenous infusion of "Glutathione Sodium Salt" it is  
49 able to reduce the level of oxidative state in the area of myocardial infarction.

50 Secondary objectives of the trial: To verify if the intravenous infusion of "Glutathione Sodium Salt"  
51 during the procedures of primary PCI it is able to limit the extension of the ischemic area, to  
52 reduce the incidence of the no-reflow, to improve the degree of myocardial blush and to decrease  
53 the indexes of suffering post-procedural ischemia (ST elevation; release of myocardial necrosis  
54 markers).

55 Principal inclusion criteria: STEMI patients submitted to p-PCI up to 12 hours.

56 Age ≥ 18 years. Women and Men. Signed informed consent

#### Principal exclusion criteria:

Patients with cardiac arrest, ventricular fibrillation, cardiogenic shock, stent thrombosis, previous acute myocardial infarction, or angina within 48 hours before infarction were not included in the study. Patients with evidence of coronary collaterals (2-3 Rentrop) to the region at risk on initial coronary angiography (at the time of admission) will be excluded. Moreover, patients with EF  $\leq 30\%$ , impaired renal function (creatinine  $> 3.0$  mg/dl), recipient of heart transplant, a life expectancy less than 12 months, has known allergies to aspirin, clopidogrel bisulfate, heparin, contrast media or stainless steel that cannot be managed medically were excluded. Patient needs therapy with warfarin or currently participating in an investigational drug or another device study were not considered enrolling.

#### End points

Primary end point(s): The primary endpoint will consist in the assessment of the effects of the infusion of "Glutathione Sodium Salt" on the reduction of the oxidative markers and inflammation after PCI.

Timepoint(s) of clinical evaluation of this end point: before, 2 hour and 5 days from the p-PCI

Secondary end point(s): The secondary endpoint will include: (1) the assessment of the variations of the corrected TIMI frame count (cTFC) and the TIMI Myocardial Perfusion Grade (TMPG) after p-PCI; (2) the assessment of the middle values of peak of the cardiac Troponin, after the procedure; (3) to verify, through telephone contact or a programmed visit, the principal adverse clinical events as death, acute myocardial infarct, stent's thrombosis of the treated vessels or the occurrence of a new revascularization, up to 6 months after the procedure.

Medical Doctors don't have the knowledge both about the possible infusion of the Glutathione Sodium Salt, in the examined patient, then others clinical data.

Moreover, serological levels of Troponin and creatinine will be measured before the p-PCI and after the procedure (2, 6, 12 and 24 hours).

Besides, through 2D Echocardiography with Simpson's biplane method the FE will be calculate at admission and after hospital discharge.

If clinical-instrumental signs of ischemia will rise up, the patient will be submitted to a new angiography.

Definition of the end of the trial and justification where it is not the last visit of the last subject undergoing the trial: LVLS or telephonic contact

Population of Trial Subjects

Trial has subjects under 18: No

Adults (18-64 years): Yes

Number of subjects for this age range: 30

Elderly ( $\geq 65$  years): Yes

Number of subjects for this age range: 60

Female: Yes

Male: Yes

Patients: Yes

Specific vulnerable populations: Yes

Women of childbearing potential not using contraception: Yes

Women of child-bearing potential using contraception: Yes

1  
2  
3  
4  
5  
6  
7  
8  
9  
10  
11  
12  
13  
14  
15  
16  
17  
18  
19  
20  
21  
22  
23  
24  
25  
26  
27  
28  
29  
30  
31  
32  
33  
34  
35  
36  
37  
38  
39  
40  
41  
42  
43  
44  
45  
46  
47  
48  
49  
50  
51  
52  
53  
54  
55  
56  
57  
58  
59  
60

Pregnant women: No

Nursing women: No

Emergency situation: No

Subjects incapable of giving consent personally: No

Planned number of subjects to be included: 90

#### **F. Investigator Networks to be involved in the Trial**

N. Review by the Competent Authority or Ethics Committee in the country concerned

N. Competent Authority Decision: Authorised

N. Date of Competent Authority Decision: 2015-01-13

N. Ethics Committee Opinion of the trial application: Favourable

N. Date of Ethics Committee Opinion: 2015-02-12

N. Centers involved in the study: Department of Heart and Great Vessel "A. Reale", Sapienza University of Rome (coordinator centre) - "Santa Maria" Terni Hospital - "San Giovanni Evangelista" Tivoli Hospital, all in Italy.

P. End of Trial Status: analyzed as pilot study the first 50 enrolled patients. Ongoing.

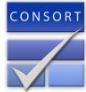

## CONSORT 2010 checklist of information to include when reporting a randomised trial\*

| Section/Topic                    | Item No | Checklist item                                                                                                                                                                              | Reported on page No |
|----------------------------------|---------|---------------------------------------------------------------------------------------------------------------------------------------------------------------------------------------------|---------------------|
| <b>Title and abstract</b>        |         |                                                                                                                                                                                             |                     |
|                                  | 1a      | Identification as a randomised trial in the title                                                                                                                                           | 1                   |
|                                  | 1b      | Structured summary of trial design, methods, results, and conclusions (for specific guidance see CONSORT for abstracts)                                                                     | 2                   |
| <b>Introduction</b>              |         |                                                                                                                                                                                             |                     |
| Background and objectives        | 2a      | Scientific background and explanation of rationale                                                                                                                                          | 4                   |
|                                  | 2b      | Specific objectives or hypotheses                                                                                                                                                           | 5                   |
| <b>Methods</b>                   |         |                                                                                                                                                                                             |                     |
| Trial design                     | 3a      | Description of trial design (such as parallel, factorial) including allocation ratio                                                                                                        | 6                   |
|                                  | 3b      | Important changes to methods after trial commencement (such as eligibility criteria), with reasons                                                                                          | NA                  |
| Participants                     | 4a      | Eligibility criteria for participants                                                                                                                                                       | 6                   |
|                                  | 4b      | Settings and locations where the data were collected                                                                                                                                        | 7                   |
| Interventions                    | 5       | The interventions for each group with sufficient details to allow replication, including how and when they were actually administered                                                       | 7                   |
| Outcomes                         | 6a      | Completely defined pre-specified primary and secondary outcome measures, including how and when they were assessed                                                                          | 7-8                 |
|                                  | 6b      | Any changes to trial outcomes after the trial commenced, with reasons                                                                                                                       | NA                  |
| Sample size                      | 7a      | How sample size was determined                                                                                                                                                              | 9                   |
|                                  | 7b      | When applicable, explanation of any interim analyses and stopping guidelines                                                                                                                | 9                   |
| <b>Randomisation:</b>            |         |                                                                                                                                                                                             |                     |
| Sequence generation              | 8a      | Method used to generate the random allocation sequence                                                                                                                                      | 7                   |
|                                  | 8b      | Type of randomisation; details of any restriction (such as blocking and block size)                                                                                                         | 7                   |
| Allocation concealment mechanism | 9       | Mechanism used to implement the random allocation sequence (such as sequentially numbered containers), describing any steps taken to conceal the sequence until interventions were assigned | 7                   |
| Implementation                   | 10      | Who generated the random allocation sequence, who enrolled participants, and who assigned participants to interventions                                                                     | 7                   |
| Blinding                         | 11a     | If done, who was blinded after assignment to interventions (for example, participants, care providers, those                                                                                | 7                   |

|    |                          |                                                             |                                                                                                                  |
|----|--------------------------|-------------------------------------------------------------|------------------------------------------------------------------------------------------------------------------|
| 1  |                          | assessing outcomes) and how                                 |                                                                                                                  |
| 2  | 11b                      | If relevant, description of the similarity of interventions | NA                                                                                                               |
| 3  | Statistical methods      | 12a                                                         | Statistical methods used to compare groups for primary and secondary outcomes                                    |
| 4  |                          | 12b                                                         | Methods for additional analyses, such as subgroup analyses and adjusted analyses                                 |
| 5  |                          |                                                             | NA                                                                                                               |
| 6  | <b>Results</b>           |                                                             |                                                                                                                  |
| 7  | Participant flow (a      | 13a                                                         | For each group, the numbers of participants who were randomly assigned, received intended treatment, and         |
| 8  | diagram is strongly      |                                                             | were analysed for the primary outcome                                                                            |
| 9  | recommended)             | 13b                                                         | For each group, losses and exclusions after randomisation, together with reasons                                 |
| 10 | Recruitment              | 14a                                                         | Dates defining the periods of recruitment and follow-up                                                          |
| 11 |                          | 14b                                                         | Why the trial ended or was stopped                                                                               |
| 12 |                          |                                                             | NA                                                                                                               |
| 13 | Baseline data            | 15                                                          | A table showing baseline demographic and clinical characteristics for each group                                 |
| 14 | Numbers analysed         | 16                                                          | For each group, number of participants (denominator) included in each analysis and whether the analysis was      |
| 15 |                          |                                                             | by original assigned groups                                                                                      |
| 16 |                          |                                                             | 10                                                                                                               |
| 17 | Outcomes and             | 17a                                                         | For each primary and secondary outcome, results for each group, and the estimated effect size and its            |
| 18 | estimation               |                                                             | precision (such as 95% confidence interval)                                                                      |
| 19 |                          | 17b                                                         | For binary outcomes, presentation of both absolute and relative effect sizes is recommended                      |
| 20 |                          |                                                             | NA                                                                                                               |
| 21 | Ancillary analyses       | 18                                                          | Results of any other analyses performed, including subgroup analyses and adjusted analyses, distinguishing       |
| 22 |                          |                                                             | pre-specified from exploratory                                                                                   |
| 23 |                          |                                                             | NA                                                                                                               |
| 24 | Harms                    | 19                                                          | All important harms or unintended effects in each group (for specific guidance see CONSORT for harms)            |
| 25 |                          |                                                             | 10                                                                                                               |
| 26 | <b>Discussion</b>        |                                                             |                                                                                                                  |
| 27 | Limitations              | 20                                                          | Trial limitations, addressing sources of potential bias, imprecision, and, if relevant, multiplicity of analyses |
| 28 | Generalisability         | 21                                                          | Generalisability (external validity, applicability) of the trial findings                                        |
| 29 | Interpretation           | 22                                                          | Interpretation consistent with results, balancing benefits and harms, and considering other relevant evidence    |
| 30 |                          |                                                             | 14                                                                                                               |
| 31 | <b>Other information</b> |                                                             |                                                                                                                  |
| 32 | Registration             | 23                                                          | Registration number and name of trial registry                                                                   |
| 33 |                          |                                                             | 5                                                                                                                |
| 34 | Protocol                 | 24                                                          | Where the full trial protocol can be accessed, if available                                                      |
| 35 |                          |                                                             | Supplementary                                                                                                    |
| 36 | Funding                  | 25                                                          | Sources of funding and other support (such as supply of drugs), role of funders                                  |
| 37 |                          |                                                             | file                                                                                                             |
| 38 |                          |                                                             | 16                                                                                                               |

38 \*We strongly recommend reading this statement in conjunction with the CONSORT 2010 Explanation and Elaboration for important clarifications on all the items. If relevant, we also  
 39 recommend reading CONSORT extensions for cluster randomised trials, non-inferiority and equivalence trials, non-pharmacological treatments, herbal interventions, and pragmatic trials.  
 40 Additional extensions are forthcoming: for those and for up to date references relevant to this checklist, see [www.consort-statement.org](http://www.consort-statement.org).  
 41  
 42

# BMJ Open

## Glutathione infusion before primary percutaneous coronary intervention: a randomized controlled pilot study.

|                                 |                                                                                                                                                                                                                                                                                                                                                                                                                                                                                                                                                                                                                                                                                                                                                                                                                                                                                                                                                                                                                                                                                                                                                                                                                        |
|---------------------------------|------------------------------------------------------------------------------------------------------------------------------------------------------------------------------------------------------------------------------------------------------------------------------------------------------------------------------------------------------------------------------------------------------------------------------------------------------------------------------------------------------------------------------------------------------------------------------------------------------------------------------------------------------------------------------------------------------------------------------------------------------------------------------------------------------------------------------------------------------------------------------------------------------------------------------------------------------------------------------------------------------------------------------------------------------------------------------------------------------------------------------------------------------------------------------------------------------------------------|
| Journal:                        | <i>BMJ Open</i>                                                                                                                                                                                                                                                                                                                                                                                                                                                                                                                                                                                                                                                                                                                                                                                                                                                                                                                                                                                                                                                                                                                                                                                                        |
| Manuscript ID                   | bmjopen-2018-025884.R2                                                                                                                                                                                                                                                                                                                                                                                                                                                                                                                                                                                                                                                                                                                                                                                                                                                                                                                                                                                                                                                                                                                                                                                                 |
| Article Type:                   | Research                                                                                                                                                                                                                                                                                                                                                                                                                                                                                                                                                                                                                                                                                                                                                                                                                                                                                                                                                                                                                                                                                                                                                                                                               |
| Date Submitted by the Author:   | 12-Apr-2019                                                                                                                                                                                                                                                                                                                                                                                                                                                                                                                                                                                                                                                                                                                                                                                                                                                                                                                                                                                                                                                                                                                                                                                                            |
| Complete List of Authors:       | Tanzilli, Gaetano; University of Rome La Sapienza, Department of Heart and Great Vessels,<br>Truscelli, Giovanni; Sapienza University of Rome<br>Arrivi, Alessio; Department of Cardiology<br>Carnevale, Roberto; Sapienza University, I Clinica Medica<br>Placanica, Attilio; Department of Cardiology<br>Viceconte, Nicola; Università degli studi di Roma "La Sapienza", Dipartimento Cuore e Grossi Vasi<br>Raparelli, Valeria ; Sapienza University of Rome, I Clinica Medica, Department of Internal Medicine and Medical Specialties<br>Mele, Rita; Sapienza University<br>Cammisotto, Vittoria; Sapienza University, Department of Internal Medicine and Medical Specialties<br>Nocella, Cristina; IRCCS NeuroMed<br>Barillà, Francesco; Sapienza University , Department of the Heart and Great Vessels<br>Lucisano, Luigi; Department of Cardiology<br>Pennacchi, Mauro; Department of Cardiology<br>Granatelli, Antonino; Department of Cardiology<br>Dominici, Marcello; Department of Cardiology<br>Basili, Stefania; Sapienza University of Rome, I Clinica Medica<br>Gaudio, Carlo; University of Rome La Sapienza<br>Mangieri, Enrico; Policlinico Umberto I, Sapienza University, Cuore e Grossi Vasi |
| <b>Primary Subject Heading</b>: | Cardiovascular medicine                                                                                                                                                                                                                                                                                                                                                                                                                                                                                                                                                                                                                                                                                                                                                                                                                                                                                                                                                                                                                                                                                                                                                                                                |
| Secondary Subject Heading:      | Pharmacology and therapeutics                                                                                                                                                                                                                                                                                                                                                                                                                                                                                                                                                                                                                                                                                                                                                                                                                                                                                                                                                                                                                                                                                                                                                                                          |
| Keywords:                       | Glutathione, Reperfusion Injury, STEMI, hydrogen peroxide                                                                                                                                                                                                                                                                                                                                                                                                                                                                                                                                                                                                                                                                                                                                                                                                                                                                                                                                                                                                                                                                                                                                                              |
|                                 |                                                                                                                                                                                                                                                                                                                                                                                                                                                                                                                                                                                                                                                                                                                                                                                                                                                                                                                                                                                                                                                                                                                                                                                                                        |

SCHOLARONE™  
Manuscripts



1  
2  
3 1 **Glutathione infusion before primary percutaneous coronary intervention: a randomized**  
4  
5 2 **controlled pilot study.**

6  
7 3 Gaetano Tanzilli<sup>1</sup>, Giovanni Truscelli<sup>1</sup>, Alessio Arrivi<sup>2</sup>, Roberto Carnevale<sup>3,4</sup>, Attilio Placanica<sup>5</sup>,  
8 4 Nicola Viceconte<sup>1</sup>, Valeria Raparelli<sup>6</sup>, Rita Mele<sup>7</sup>, Vittoria Cammisotto<sup>8</sup>, Cristina Nocella<sup>8</sup>,  
9  
10 5 Francesco Barillà<sup>1</sup>, Luigi Lucisano<sup>5</sup>, Mauro Pennacchi<sup>5</sup>, Antonino Granatelli<sup>5</sup>, Marcello Dominici<sup>2</sup>,  
11  
12 6 Stefania Basili<sup>6</sup>, Carlo Gaudio<sup>1</sup> and Enrico Mangieri<sup>1</sup>  
13  
14  
15  
16  
17 7

18  
19 8 <sup>1</sup> Department of the Heart and Great Vessels, Sapienza University of Rome, Rome, Italy

20  
21 9 <sup>2</sup> Department of Cardiology, "Santa Maria" Hospital, Terni, Italy

22  
23 10 <sup>3</sup> Department of Medical-Surgical Sciences and Biotechnologies, Sapienza University, Latina, Italy

24  
25 11 <sup>4</sup> Mediterranea Cardiocentro, Napoli

26  
27 12 <sup>5</sup> Department of Cardiology, "San Giovanni Evangelista" Hospital, Tivoli, Italy

28  
29 13 <sup>6</sup> Department of Experimental Medicine, Sapienza University of Rome, Rome, Italy

30  
31 14 <sup>7</sup> Department of Surgical Sciences, Sapienza University, Rome, Italy

32  
33 15 <sup>8</sup> Department of Internal Medicine and Medical Specialties, Sapienza University, Rome, Italy  
34  
35  
36  
37  
38 16

39  
40 17 **Corresponding Author:**

41  
42 18 Gaetano Tanzilli, MD, Department of Heart and Great Vessels "Attilio Reale", Sapienza University  
43 19 of Rome, Viale del Policlinico 155, 00161 Rome, Italy; +39 06 49973240

44  
45 20 [gaetano.tanzilli@uniroma1.it](mailto:gaetano.tanzilli@uniroma1.it)  
46  
47  
48  
49 21

50  
51 22 **Word count: 3186**  
52  
53  
54 23  
55  
56 24  
57  
58 25  
59  
60 26

## 1 **Abstract**

2 **Objective-** In the setting of reperfused ST-elevation myocardial infarction (STEMI), increased  
3 production of reactive oxygen species (ROS) contributes to reperfusion injury. Among ROS,  
4 hydrogen peroxide (H<sub>2</sub>O<sub>2</sub>) showed toxic effects on human cardiomyocytes and may induce  
5 microcirculatory impairment. Glutathione (GSH) is a water-soluble tripeptide with a potent oxidant  
6 scavenging activity. We hypothesized that the infusion of GSH before acute reoxygenation might  
7 counteract the deleterious effects of increased H<sub>2</sub>O<sub>2</sub> generation on myocardium.

8 **Methods-** Fifty consecutive STEMI patients scheduled to undergo primary angioplasty were  
9 randomly assigned, before intervention, to receive an infusion of GSH (2500 mg/25ml over 10 min)  
10 followed by drug administration at the same doses at 24, 48, 72 hours elapsing time or placebo.  
11 Peripheral blood samples were obtained before and at the end of procedure as well as after 5 days.  
12 H<sub>2</sub>O<sub>2</sub> production, 8-iso-PGF<sub>2</sub> $\alpha$  formation, H<sub>2</sub>O<sub>2</sub> breakdown activity (HBA) and nitric oxide (NO)  
13 bioavailability were determined. Serum cardiac-Troponin T (cTpT) was measured at admission and  
14 up to 5 days.

15 **Results-** Following acute reperfusion, a significant reduction of H<sub>2</sub>O<sub>2</sub> production (p=0.0015) and 8-  
16 iso-PGF<sub>2</sub> $\alpha$  levels (p=0.0003) as well as a significant increase in HBA (p<0.0001) and NO  
17 bioavailability (p=0.035) was found in the GSH group as compared with placebo. In treated  
18 patients, attenuated production of H<sub>2</sub>O<sub>2</sub> persisted up to 5 days from the index procedure (p=0.009)  
19 and these changes were linked to those of cTpT levels (r=0.41, p= 0.023).

20 **Conclusion** The prophylactic and prolonged infusion of GSH seems determined a rapid onset and  
21 persistent blunting of H<sub>2</sub>O<sub>2</sub> generation improving myocardial cell survival. Nevertheless, a larger  
22 trial, adequately powered for evaluation of clinical endpoints, is ongoing to confirm the current  
23 finding.

24  
25 **Key words:** Glutathione; STEMI; Reperfusion Injury; Reactive Oxygen Species; hydrogen  
26 peroxide, Percutaneous Coronary Interventions.

1  
2  
3 1 **Article summary**  
4

5 2 **Strengths and limitations of this study**  
6

- 7  
8 3 1. In patients who suffer from STEMI, acute reoxygenation of ischemic myocardium can  
9  
10 4 induce additional myocardial cell injury mainly driven by heightened oxidative status.  
11  
12 5 2. Reactive oxygen species (ROS) generation further contributes to damage myocardium by  
13  
14 6 limiting bioavailability of nitric oxide at microcirculatory level.  
15  
16  
17 7 3. This pilot study demonstrates that in the setting of STEMI reperfusion the rapid onset and  
18  
19 8 prolonged antioxidant (scavenging) activity obtained by infusion of glutathione (GSH)  
20  
21 9 protects the myocardium.  
22  
23  
24 10 4. This study is limited by the lack of clinical end points and the small sample size. Moreover,  
25  
26 11 qualitative assessment of GSH-induced improvement of myocardial reperfusion indexes,  
27  
28 12 might only represent the effect of a preserved microcirculatory responsiveness to vasoactive  
29  
30 13 substances (i.e. NO) but unable to limit the expansion of myocardial cell damage.  
31  
32  
33 14  
34  
35 15  
36  
37 16  
38  
39  
40 17  
41  
42 18  
43  
44 19  
45  
46  
47 20  
48  
49 21  
50  
51 22  
52  
53  
54 23  
55  
56 24  
57  
58 25  
59  
60 26

## 1 Introduction

2 It is well known that reactive oxygen species (ROS) are produced at an accelerated rate in tissues  
3 subjected to reperfusion and that the accumulation of ROS contributes to reperfusion injury during  
4 reintroduction of molecular oxygen to the ischemic environment.[1,2]

5 In the setting of ST-elevation myocardial infarction (STEMI), ROS-induced myocardial cell death  
6 occurs in the first few minutes of acute reoxygenation[3] and may continue for weeks to months by  
7 activation of apoptosis and autophagy processes.[4,5] ROS generation also contributes to structural  
8 capillary damage and endothelial dysfunction, which hinder the achievement of an optimal  
9 perfusion grade at microcirculatory level.[6,7] Over the time, this may result in adverse left  
10 ventricular (LV) remodeling and worse LV function.[8-10]

11 Among ROS, hydrogen peroxide ( $H_2O_2$ ) is produced by many enzymes including for example  
12 xanthine oxidase, lipoxygenase and, in particular, NADPH oxidase.[11]  $H_2O_2$  shows an important  
13 role in ischemia/reperfusion damage. In particular, the exposure of cultured human cardiomyocytes  
14 to  $H_2O_2$  has determined rapid onset and progressive oxidative cell death.[12] Moreover,  $H_2O_2$   
15 influences platelet activation and promotes vascular dysfunction through thromboxane  $A_2$  and  
16 isoprostanes formation, which are vasoconstrictors and powerful aggregating molecules derived  
17 from lipid peroxidation of esterified unsaturated fatty acids.[13-15]

18 Human possesses numerous enzymatic and non-enzymatic antioxidant systems. Among enzymatic  
19 system, glutathione peroxidase (GPx) plays an important role to prevent potentially deleterious  
20 effects of  $H_2O_2$ . [16] Thus, the reduced plasma level of glutathione (GSH), a water-soluble tripeptide  
21 with a potent oxidant scavenging activity and fundamental substrate for GPx activity, could have a  
22 key role in promoting myocardial and endothelial cell damage.[17] In fact, a decrease in myocardial  
23 GSH content has been observed during ischemia and reperfusion of the ischemic myocardium.[18]  
24 Despite robust evidences regarding the role of ROS in reperfusion injury, currently, in clinical  
25 practice, there are no treatments aimed at preventing ROS generation.

1  
2  
3  
4  
5  
6  
7  
8  
9  
10  
11  
12  
13  
14  
15  
16  
17  
18  
19  
20  
21  
22  
23  
24  
25  
26  
27  
28  
29  
30  
31  
32  
33  
34  
35  
36  
37  
38  
39  
40  
41  
42  
43  
44  
45  
46  
47  
48  
49  
50  
51  
52  
53  
54  
55  
56  
57  
58  
59  
60

1 Preclinical study of ischemia/reperfusion demonstrated that timely application of GSH provides  
2 better cardio-protection at higher doses [19]. Our hypothesis is that the use of GSH might  
3 counteract deleterious effect of augmented oxidant activity during reperfusion of STEMI [20].  
4 Currently, a glutathione solution is available for intravenous usage to reduce side effects of  
5 chemotherapy treatment for cancer with a tolerable safety profile, however it has never been tested  
6 in the setting of patients with STEMI.  
7 Therefore, we performed a pilot study to explore whether a short-term intravenous GSH  
8 administration, just before and after a primary percutaneous coronary intervention (p-PCI) in  
9 STEMI patients, was able to reduce oxidative stress and antioxidant status markers, resulting in a  
10 reduction of the myocardial damage.

## 11 **Methods**

### 12 **Study Design**

13 GSH2014 is a multicenter, no profit, randomized, double-blind, prospective, placebo-controlled  
14 trial. The Department of Heart and Great Vessel "A. Reale", Sapienza University of Rome, Italy  
15 was the coordinator center and designed the protocol (see Supplementary file). Two other centers,  
16 "Santa Maria" Terni Hospital and "San Giovanni Evangelista" Tivoli Hospital, both in Italy, were  
17 involved in the study as recruiting site.

18 The study has been planned according to principles of the declaration of Helsinki. Ethic Committee  
19 of the coordinator centre and Italian Medicines Agency (AIFA) (Date of Competent Authority  
20 Decision: 2015-01-13) authorized the study. Written informed consent was obtained from all  
21 patients enrolled. (<https://www.clinicaltrialsregister.eu/ctr-search/trial/2014-004486-25/IT#N>)

### 22 **Patient and Public Involvement**

23 Patients and or public were not involved in the different stages of the study (including the design  
24 and the recruitment phase). However, we intend to disseminate the main results to trial participants  
25 and will seek patient and public involvement in the development of an appropriate method of  
26 dissemination.

## 1 **Study population and protocol**

2 Between March and August 2017, 157 consecutive STEMI patients, age >18 years, both sexes,  
3 referred to the three enrolling centers for primary percutaneous coronary intervention (p-PCI) were  
4 screened to enter in the study. Inclusion criteria were: typical chest pain lasting more than 30 min  
5 with pain onset <12 h, ST segment elevation >0.2 mV in at least two contiguous leads in the initial  
6 ECG, successful p-PCI (residual coronary stenosis <20%) and blood sampling for biochemical  
7 determinations collected prior to p-PCI.

8 Exclusion criteria were: symptoms duration > 12 h (n=15), rescue PCI (n=16), cardiogenic shock  
9 (n=3), left main disease (n=3), evidence of coronary collateral vessels (Rentrop score of 2 or 3 for  
10 the area at risk) (n=5), prior myocardial infarction (n=7), estimated glomerular filtration rate less  
11 than 30 ml/min (n=13), acute infection (n=2), treatment with systemic corticosteroids (n=4) or oral  
12 anticoagulants (n=7), malignancy (n=3), in-stent thrombosis (n=3), lack of consent to participate  
13 (n=18). Additionally, 8 patients were ineligible because no blood samples were collected before the  
14 start of procedure. Finally, a total of 50 patients were enrolled (see Figure 1- CONSORT diagram).

15 The present analysis reported the results of the interim analysis (pre-planned in the protocol) on the  
16 acute effect of GSH infusion on markers of oxidative stress.

17 After percutaneous access was obtained, an intravenous bolus of 5.000 U of unfractionated heparin  
18 was administered, with sufficient supplements (if necessary) to maintain an activated clotting time  
19 (ACT)  $\geq$  250 seconds during interventions.

20 After baseline collection of peripheral blood samples, patients were randomized to an intravenous  
21 infusion of GSH (2500 mg/25 ml of Glutathione Sodium Salt, Biomedica Foscama Group, Rome,  
22 Italy) or placebo (saline solution) over 10 min before p-PCI. The two solutions appeared identical  
23 in size and colour to ensure blinding. Study participants, investigators and the laboratory staff  
24 remained blinded until the statistical analysis was performed by an independent researcher who was  
25 not involved in the study.

1  
2  
3 1 Patients underwent p-PCI according to standard protocols. The use of thrombus aspiration,  
4  
5 2 glycoprotein IIb/IIIa inhibition was left to the discretion of the treating physician. Multivessel PCI  
6  
7  
8 3 was performed in a staged fashion (7 to 10 days from index procedure).

9  
10 4 All patients had drug-eluting stents implanted in treated vessels. After interventions, GSH was  
11  
12 5 infused at the same doses at 24, 48, 72 hours elapsing time. Further blood samples were obtained at  
13  
14 6 the end of procedure and 5 days from index procedure.

15  
16  
17 7 After 60'-90', a post-procedural 12 leads- ECG for ST measurement were performed.

18  
19 8 Corrected TIMI frame count (cTFC) and TIMI myocardial perfusion grade (TMPG) were assessed  
20  
21 9 after pPCI as previously described [21]. An external Core Lab processed the data (G.P and G.P:  
22  
23 10 independent cardiologists). Digital angiograms were analyzed off-line with the use of an automated  
24  
25  
26 11 edge detection system (Cardiovascular Medical System, MEDIS Imaging Systems, Leiden, the  
27  
28 12 Netherlands).

### 30 13 **Randomization and blinding**

31  
32  
33 14 An individual not involved in the study assigned codes (using a computer-generated random  
34  
35 15 sequence) to the study treatment with a random allocation of patients to an intravenous infusion of  
36  
37 16 GSH (2500 mg/25 ml over 10 min) or placebo (saline solution) before p-PCI. The interventional  
38  
39 17 cardiologists who performed p-PCI, those who analyzed digital angiograms and the laboratory  
40  
41  
42 18 technicians were unaware of study treatment allocation.

### 43 44 19 **Primary Endpoint**

45  
46  
47 20 The primary endpoint was the change on oxidative stress markers levels after 2 hours from p-PCI in  
48  
49 21 patients treated with GSH as compared with placebo.

### 50 51 22 **Secondary Endpoints**

52  
53 23 The secondary endpoints included the assessment of: (i) changes of oxidative stress markers levels  
54  
55 24 after 5 days from the p-PCI in patients received GSH or placebo; (ii) changes in serum cTnT,  
56  
57  
58 25 biochemical markers of myocardial cell damage, in patients received GSH or placebo before and  
59  
60 26 after 5 days from the procedure.

## 1 **Peripheral blood samples**

2 Blood samples were drawn from antecubital vein, before the start of procedure and after stent  
3 deployment in all patients and then collected into tubes without anticoagulant or with 3.8% sodium  
4 citrate, lithium heparin and EDTA and centrifuged at  $300\times g$  for 10 min to obtain supernatant. All  
5 plasma and serum aliquots were stored at  $-80^{\circ}\text{C}$  in appropriate cuvettes until assayed.

6 Markers of oxidative stress and antioxidant system (i.e.  $\text{H}_2\text{O}_2$ ,  $\text{H}_2\text{O}_2$  breakdown activity (HBA) and  
7 8-iso-PGF $2\alpha$ ) were analyzed in serum samples collected before p-PCI, 2 hours and 5 days after p-  
8 PCI. Due to the chemical properties of the oxidative stress markers, to avoid a long-time storage of  
9 blood samples and guarantee the laboratory test quality the analyses were performed within 6  
10 months from the collection.

11 Serum cardiac Troponin T (cTpT) was measured at admission, before the procedure, 6 and 12 hours  
12 after reperfusion, and thereafter once a day up to 5 days. Serum cTpT levels were measured using  
13 ELISA Kit (Elabsciences).

## 14 **$\text{H}_2\text{O}_2$ production**

15 The  $\text{H}_2\text{O}_2$  was evaluated by a Colorimetric Detection Kit (Arbor Assays, Ann Arbor, Michigan, US)  
16 and expressed as  $\mu\text{M}$ . Intra-assay and inter-assay coefficients of variation were 2.1% and 3.7%,  
17 respectively.

## 18 **Determination of % HBA in peripheral serum**

19 The evaluation of the ability to detoxify  $\text{H}_2\text{O}_2$  was assessed by the analysis of **the HBA** in serum  
20 with HBA assay kit (Aurogene, Rome, Italy, code HPSA-50). The % of HBA was calculated  
21 according to the following formula: % of HBA =  $[(\text{Ac}-\text{As}) / \text{Ac}] \times 100$  where Ac is the absorbance  
22 of  $\text{H}_2\text{O}_2$  1.4 mg/ml and As is the absorbance in the presence of the serum sample.

## 23 **Serum Nitric Oxide (NO) bioavailability**

24 A colorimetric assay kit (Cell Biolabs, San Diego, CA, US) was used to determine NO  
25 bioavailability by measurement of the nitric oxide metabolites nitrite and nitrate ( $\text{NO}_x$ ) in the  
26 serum. Intra-assay and inter-assay coefficients of variation were 2.9% and 1.7% respectively.



### 1 **Serum 8-iso-Prostaglandin F2 $\alpha$ formation**

2  
3  
4  
5  
6  
7  
8  
9  
10  
11  
12  
13  
14  
15  
16  
17  
18  
19  
20  
21  
22  
23  
24  
25  
26  
27  
28  
29  
30  
31  
32  
33  
34  
35  
36  
37  
38  
39  
40  
41  
42  
43  
44  
45  
46  
47  
48  
49  
50  
51  
52  
53  
54  
55  
56  
57  
58  
59  
60

1 Concentration of 8-iso-PGF2 $\alpha$  in serum was measured by validated enzyme immunoassay (EIA) method (DRG International, Springfield, NJ, USA). Intra-assay and inter-assay coefficients of variation were 5.8% and 5.0% respectively. Values were expressed as pmol/L.

### 5 **Myocardial function**

6 After 120 minutes and 5 days from the intervention, left ventricular end-diastolic volume (LVEDV), left ventricular end-systolic volume (LVESV) and ejection fraction (LVEF) were calculated by the biplane Simpson's rule, as recommended by the American Society of Echocardiography. The mean values of three measurements were used for statistical evaluation.

### 10 **Sample Size Calculation**

11 For the present preliminary analysis, the sample size calculation was estimated considering previous data available for 8-iso-PGF2 $\alpha$  levels [22]. A sample size of 25 patients undergoing GSH infusion provided an intervention study with 80% power to detect a 20% reduction in plasmatic 8-iso-PGF2- $\alpha$  levels measured at the end of successfully reperfusion with respect to the placebo group. We also assumed a 25% SD in each group.

### 16 **Statistical analysis**

17 Categorical variables were reported as counts (percentage) and continuous variables as means  $\pm$  standard deviation (SD). We tested the independence of categorical variables by  $\chi^2$  test and the normal distribution of continuous variables by Kolmogorov-Smirnov test. We used Student paired and unpaired t test, repeated measure ANOVA and Pearson product-moment correlation analysis to evaluate normally distributed continuous variables. Appropriate nonparametric tests (Mann-Whitney U test, Wilcoxon rank test and Spearman rank correlation test) were employed for all the other variables. As an overall nonparametric ANOVA, the Friedman test for the analysis of intragroup variations was used. In cases of significance, we compared pair related samples using the Wilcoxon test. The intergroup analysis was performed with the nonparametric Mann-Whitney U-test. Only two-tailed probabilities were used for testing statistical significance. Probability values <

0.05 were regarded as statistically significant. All calculations were made with the computer program STATISTICA 7 (StatSoft, Tulsa, OK, USA).

### Results

Twenty-five patients randomly received GSH and 25 placebo. All patients completed the phases of the study (Figure 1). All patients had a TIMI flow grade equal to 0 or 1 requiring percutaneous treatment. Clinical and angiographic characteristics of patients are shown in Table 1 and 2. The baseline characteristics were well balanced between the two groups. In both groups, neither side effects during the infusion, nor adverse events during the short observation period were recorded.

Oxidative stress, antioxidant status and vascular function in peripheral samples. Biochemical data are summarized in Table 3. Baseline  $H_2O_2$  and 8-iso-PGF $2\alpha$  levels were similar between treated patients and controls. After PCI, a significant reduction of  $H_2O_2$  production and 8-iso-PGF $2\alpha$  levels was observed in GSH group as compared to controls (Figure 2A and 2B). Moreover, a significant increase in HBA and NO bioavailability was observed (Figure 2C and 2D).

At the 5 days from index procedure, a persistent significant reduction of  $H_2O_2$  production and a sustained increase in HBA and NO bioavailability was observed in the GSH group as compared with controls (Figure 2A-D).

**Serological markers of myocardial injury.** Baseline cTnT mean values were similar between GSH and placebo groups ( $176.0 \pm 20.9$  pg/ml vs.  $165.4 \pm 20.9$  pg/ml,  $p=0.079$ ). At 6 hours, no changes in cTnT values were found in GSH-treated patients ( $172.1 \pm 27.7$  pg/ml vs. baseline,  $p=0.065$ ). At 12 hours and 5 days after pPCI, GSH-treated patients showed a progressive decrease of cTnT levels ( $170.0 \pm 44.7$  pg/ml and  $137.9 \pm 23.7$  pg/ml;  $-21 \pm 23.1\%$ ,  $p=0.009$  vs. baseline). Differently, a significant increase and persistence of high values of cTnT were observed in placebo group (T6,  $169.9 \pm 16.3$  pg/ml, T12,  $183.0 \pm 34.8$  pg/ml and T5d,  $181.9 \pm 18.0$  pg/ml;  $+12.4 \pm 23.1\%$ ,  $p=0.029$  vs. baseline) (Figure 3A). A modest correlation between percentage changes of  $H_2O_2$  and cTnT levels from baseline to 5 days was found in treated group (Figure 3B).

1  
2  
3 1 **Myocardial Reperfusion indexes.** Post-procedural cTFC values did not show a statistically  
4  
5 2 significant reduction between treated and control groups ( $20.7 \pm 7.3$  vs.  $23.4 \pm 5.1$ ,  $p=0.156$ ).  
6  
7 3 Interestingly, 6 patients (24%) in the placebo group and 15 (60%) patients in GSH group reached  
8  
9 4 lower-risk ( $\leq 20$  frames/s) cTFC class ( $p=0.019$ ). After PCI,  $\text{TMPG} \geq 2$  was assessed in 21 patients  
10  
11 5 (84%) and 14 patients (56%) of the GSH and placebo groups, respectively ( $p = 0.064$ ). Of note, 11  
12  
13 6 patients (44%) of the GSH group only had  $\text{TMPG}=3$  ( $p=0.0002$  vs. controls). Post-reperfusion  
14  
15 7 cTFC values showed a significant correlation with changes of 8-iso-PGF $2\alpha$  ( $R=0.55$ ,  $p=0.012$ )  
16  
17 8 levels from baseline.

18  
19  
20  
21 9 **Myocardial function.** Myocardial function was not different between groups after either baseline  
22  
23 10 or at discharge. There was no significant difference between groups regarding LVEF, LVEDV or  
24  
25 11 LVESV at any time point (Table 4).

## 26 12 **Discussion**

27  
28  
29  
30 13 This pilot study demonstrates that in the setting of STEMI reperfusion the rapid onset and  
31  
32 14 prolonged antioxidant (scavenging) activity obtained by infusion of GSH before and after primary  
33  
34 15 PCI reduces the oxidative stress markers. The improvement of the antioxidant status resulted in a  
35  
36 16 significant decrease of cardiac troponin, marker of myocardial damage.

37  
38  
39  
40 17 Data from experimental and clinical studies suggest that following reperfusion myocardial  
41  
42 18 cells death largely contributes to the final infarct size.[23,24] On the other hand, the extent of  
43  
44 19 damaged myocardium is the most important predictor of adverse ventricular remodeling and it is  
45  
46 20 linearly dependent upon the amount of myocardial salvage by and after reperfusion. Thus,  
47  
48 21 attenuation of pro-oxidant state is an important goal in cardioprotective interventions.[25]  
49  
50 22 Noteworthy, the serum of GSH treated patients showed a greater capacity to detoxify  $\text{H}_2\text{O}_2$   
51  
52 23 evaluated by the HBA, an assay that measure the percentage of  $\text{H}_2\text{O}_2$  neutralized into the  
53  
54 24 samples.[26] We found an early and considerable increase of HBA, with positive effects on  
55  
56 25 myocardial cell survival, assessed by cTpT.  
57  
58  
59  
60

1  
2  
3 1 Current evidences demonstrate that oxidant environment promotes cardiomyocyte death in  
4  
5 2 the first few minutes of reflow suggesting the existence of a tight window of effective cardio-  
6  
7 3 protection.[27,28] Therefore, ROS-induced injury may continue for weeks to months as a result of  
8  
9 4 activation of programmed cell death. Our data have shown a persistent heightened oxidative status  
10  
11 5 along with decreased scavenging activity in untreated patients. This behavior makes the duration of  
12  
13 6 pharmacologic interventions a central point of cardio-protection strategies. In the present study,  
14  
15 7 GSH infusion, starting just before reperfusion with subsequent administration up to 3 days after,  
16  
17 8 promoted early and sustained increase of serum HBA with attenuated production of H<sub>2</sub>O<sub>2</sub> which  
18  
19 9 was highly related to progressive significant reduction of serological signs of myocardial injury. In  
20  
21 10 addition, our data show a progressive significant decrease of serum cTnT release during the 5 days  
22  
23 11 of reperfusion in the GSH-treated patients compared with the control group resulting in a 21%  
24  
25 12 reduction of myocardial damage. Despite that, in our population, the systolic function was not  
26  
27 13 different between groups after reperfusion, although a trend towards reduced LVEDV was observed  
28  
29 14 in treated patients. A possible explanation relies on the fact that inside the area at risk variable  
30  
31 15 amount of hibernated and stunned myocardium may coexist, thus affecting the prompt recovery of  
32  
33 16 contractility after reperfusion.[29]

34  
35  
36  
37  
38  
39  
40 17 Cells have a number of mechanisms for dealing with the toxic effects of oxygen. One of the  
41  
42 18 most important is connected with the widely distributed tripeptide thiol glutathione.[16,30] In  
43  
44 19 particular, the glutathione redox cycle is a more efficient antioxidant protective mechanism of the  
45  
46 20 heart, which acts by maintaining thiol groups of enzymes and other proteins in their reduced state  
47  
48 21 thus preventing cell membrane lipid peroxidation and limiting cardiomyocytes loss.[31]  
49  
50 22 Furthermore, in our study, a close relation between reduced myocardial reperfusion and increased  
51  
52 23 of 8-iso-PGF<sub>2</sub> $\alpha$  serum levels has been observed, suggesting that oxidative unbalance may be  
53  
54 24 involved in microcirculation functional damage. As previously reported, impaired tissue-level  
55  
56 25 perfusion develops within minutes of established acute revascularization of ischemic areas[32] and  
57  
58 26 persists for at least 1 week.[33] In this context, there is robust evidence that ROS mediated

1  
2  
3 1 isoprostanes production contributes importantly to the post-reperfusion microvascular  
4  
5 2 impairment.[22,34] Current findings implement this observation by demonstrating a sustained  
6  
7 3 production of isoprostanes up to 5 days after reperfusion thereby suggesting their contributory role  
8  
9 4 in the pathogenesis and persistence of microvascular dysfunction that may affect myocardial cell  
10  
11 5 survival. The infusion of GSH before and 24, 48, 72 hours after pPCI reduced isoprostanes serum  
12  
13 6 levels and their reduction was linked to improvement of myocardial reperfusion indexes. Moreover,  
14  
15 7 the increase in extracellular peroxide oxidants may reduce bioavailability of nitric oxide that is  
16  
17 8 thought to contribute to promoting platelet hyperactivity and vasoconstriction.[13] In our study,  
18  
19 9 GSH supplementation seems to have a role in preserving NO bioavailability and its vasodilator  
20  
21 10 capacity at microcirculatory level.

### 26 11 **The Strengths and Limitations of the Study**

28 12 The positive effects on reperfusion indexes and on biochemical signs of myocardial necrosis  
29  
30 13 suggest the value of prophylactic and prolonged GSH administration in preventing reperfusion  
31  
32 14 injury. Thus, in patients undergoing pPCI the infusion of a powerful antioxidant scavenger, such as  
33  
34 15 GSH, may be useful to improve microcirculatory perfusion in order to further blunt the injury of  
35  
36 16 myocardial cells.

### 40 17 **Some limitations deserve to be discussed.**

42 18 The small sample size of the study and the lack of morfologic assessment of both infarct size  
43  
44 19 and microvascular obstruction extent between the two groups, actually, limit the clinical application  
45  
46 20 of these findings. Within a defined area at risk, the manifestations of ischemia-reperfusion vascular  
47  
48 21 injury go from reversible functional impairments to irreversible structural damage and contribute to  
49  
50 22 final amount of infarct myocardium. In absence of morphologic imaging, the qualitative evaluation  
51  
52 23 of GSH-induced improvement of myocardial reperfusion indexes, as assessed in our study, might  
53  
54 24 only represent the effect of a preserved microcirculatory responsiveness to vasoactive substances  
55  
56 25 (i.e. NO) but unable to limit the expansion of myocardial cell damage. Indeed, other mechanisms,  
57  
58 26 such as interstitial edema and inflammatory reaction, which induce a sustained impairment of  
59  
60

1  
2  
3 1 microvascular perfusion, may primarily act to increase the amount of irreversible injured  
4  
5 2 myocardium thus promoting adverse ventricular remodeling.  
6  
7

8 3 In conclusion, in this pilot study, we have shown that a short-term prophylactic GSH  
9  
10 4 infusion mitigates the negative effects of the excessive and persistent H<sub>2</sub>O<sub>2</sub> formation on myocardial  
11  
12 5 cells. The findings of the present study require to be confirmed through an adequately powered  
13  
14 6 STEMI population. A larger trial with a prolonged follow-up for evaluation of clinical endpoints is  
15  
16  
17 7 needed to confirm the role of GSH administration as cardioprotective therapy.  
18  
19  
20  
21  
22  
23  
24  
25  
26  
27  
28  
29  
30  
31  
32  
33  
34  
35  
36  
37  
38  
39  
40  
41  
42  
43  
44  
45  
46  
47  
48  
49  
50  
51  
52  
53  
54  
55  
56  
57  
58  
59  
60

1  
2  
3 1  
4 2 **Figure Legend**  
5 3  
6 4  
7  
8  
9 5 **Figure 1. CONSORT flowchart**  
10  
11 6  
12

13 7 **Figure 2.** H<sub>2</sub>O<sub>2</sub> production (A), 8-iso-PGF<sub>2</sub>α formation (B), hydrogen peroxide breakdown activity  
14 (HBA) (C) and NO bioavailability (D) at baseline, after 2 hours (T2h) and at the 5 days (T5d) from  
15 the PCI in patients received GSH (n=25, dashed line) or placebo (n=25, continuous line).  
16 8  
17  
18 9  
19  
20 10 Data are expressed as mean±SEM (\*\*\*p <0.001, \*\*p <0.01, \*p <0.05).  
21  
22  
23 11

24  
25 12 **Figure 3.** cTpT levels (A) at baseline, after 6 hours (T6h), 12 hours (T12h) and at the 5 days (T5d)  
26 from the PCI in patients received GSH (n=25, dashed line) or placebo (n=25, continuous line). Data  
27 13  
28 are expressed as mean±SEM (\*\*\*p<0.0001 vs. T0, \*p<0.05 vs. T0, \$p<0.05 between groups).  
29 14  
30 15 Linear correlation between % Δ cTpT and % Δ H<sub>2</sub>O<sub>2</sub> in GSH treated group (B).  
31  
32  
33

34 16  
35  
36 17  
37  
38 18  
39  
40 19  
41  
42 20  
43  
44 21  
45  
46 22  
47  
48 23  
49  
50 24  
51  
52 25  
53  
54 26  
55  
56 27  
57  
58 28  
59  
60

1  
2  
3 1  
4  
5 2  
6  
7  
8 3  
9  
10 4  
11  
12 5  
13  
14 6  
15  
16 7  
17  
18  
19 8  
20  
21 9  
22  
23 10  
24  
25 11  
26  
27 12  
28  
29  
30 13  
31  
32 14  
33  
34 15  
35  
36 16  
37  
38 17  
39  
40 18  
41  
42 19  
43  
44 20  
45  
46 21  
47  
48 22  
49  
50 23  
51  
52 24  
53  
54 25  
55  
56 26  
57  
58 27  
59  
60

## **Contributors**

GTa, EM led on the conception, design and writing of the study with substantial contributions to the design, writing, critical review of intellectual content; GTr, AA, AP, NV, RM, enrollment of patients; RC, VC, CN, provided laboratory analyses; VR, SB, provided further essential statistical advice and expertise on the study protocol; FB, LL, MP, CG, providing expert clinical support; AG, MD, made substantial contributions to the trial design and management.

## **Ethics and dissemination**

Italian Medicines Agency (AIFA) authorization and single Ethic Committee approval has been obtained for all the centers participating the study. Dissemination of results will be via peer-reviewed research publications both online and in print, conference presentations, posters, patient forums and Trust bulletins.

## **Data Availability Statement**

The data set is available on request from the corresponding author.

## **Conflicts of Interest**

Authors declare that there are not conflicts of interest.

**Funding Source:** No funding declared

**Acknowledgement:** The Authors thank dr. Gennaro Petriello and dr. Gaetano Pero for performing the external assessment of angiographic data (Core Lab)



1  
2  
3  
4  
5  
6  
7  
8  
9  
10  
11  
12  
13  
14  
15  
16  
17  
18  
19  
20  
21  
22  
23  
24  
25  
26  
27  
28  
29  
30  
31  
32  
33  
34  
35  
36  
37  
38  
39  
40  
41  
42  
43  
44  
45  
46  
47  
48  
49  
50  
51  
52  
53  
54  
55  
56  
57  
58  
59  
601  
2  
3  
4  
5  
6  
7  
8  
9  
10  
11  
12  
13  
14  
15  
16  
17  
18  
19  
20  
21  
22  
23  
24  
25  
26  
27  
28  
29  
30  
31  
32  
33  
34  
35  
36  
37  
38  
39  
40  
41  
42  
43  
44  
45  
46  
47  
48  
49  
50  
51  
52  
53  
54  
55  
56  
57  
58  
59  
60

### References

- 1 Yellon DM, Hausenloy DJ. Myocardial reperfusion injury. *N Engl J Med* 2007;357:1121-35.
- 2 Zhu X, Zuo L, Cardounel AJ, et al. Characterization of in vivo tissue redox status, oxygenation, and formation of reactive oxygen species in postischemic myocardium. *Antioxid Redox Signal* 2007;9:447-455.
- 3 Grill HP, Zweier JL, Kuppusamy P, et al. Direct measurement of myocardial free radical generation in an in vivo model: effects of postischemic reperfusion and treatment with human recombinant superoxide dismutase. *J Am Coll Cardiol* 1992;20:1604-1611.
- 4 McCully JD, Wakiyama H, Hsieh YJ, et al. Differential contribution of necrosis and apoptosis in myocardial ischemia-reperfusion injury. *Am J Physiol*. 2004;286:H1923-H1935.
- 5 Dong Y, Undyala VV, Gottlieb RA, et al. Autophagy: definition, molecular machinery, and potential role in myocardial ischemia-reperfusion injury. *J Cardiovasc Pharmacol Ther* 2010;15:220-230.
- 6 Ørn S, Manhenke C, Greve OJ, et al. Microvascular obstruction is a major determinant of infarct healing and subsequent left ventricular remodelling following primary percutaneous coronary intervention. *Eur Heart J* 2009;30:1978-1985.
- 7 Heusch G, Kleinbongard P, Skyschally A. Myocardial infarction and coronary microvascular obstruction: an intimate, but complicated relationship. *Basic Res Cardiol* 2013;108:380.
- 8 Bax M, de Winter RJ, Schotborgh CE, et al. Short- and long-term recovery of left ventricular function predicted at the time of primary percutaneous coronary intervention in anterior myocardial infarction. *J Am Coll Cardiol* 2004;43:534-541.
- 9 Araszkiwicz A, Grajek S, Lesiak M, et al. Effect of impaired myocardial reperfusion on left ventricular remodeling in patients with anterior wall acute myocardial infarction treated with primary coronary intervention. *J Cardiol* 2006;98:725-728.

- 1  
2  
3 1 10 Ndrepepa G, Tiroch K, Fusaro M, et al. 5-year prognostic value of no-reflow phenomenon after  
4  
5 2 percutaneous coronary intervention in patients with acute myocardial infarction. *J Am Coll Cardiol*  
6  
7 3 2010;55:2383-2389.  
8  
9  
10 4 11 Byon CH, Heath JM, Chen Y. Redox signaling in cardiovascular pathophysiology: A focus on  
11  
12 5 hydrogen peroxide and vascular smooth muscle cells. *Redox Biol* 2016;9:244-253.  
13  
14 6 12 Tanimoto T, Parseghian MH, Nakahara T, et al. Cardioprotective effects of HSP72  
15  
16 7 administration on ischemia-reperfusion injury. *J Am Col Cardiol* 2017;70:1479-1492.  
17  
18 8 13 Pignatelli P, Pulcinelli FM, Lenti L, et al. Hydrogen peroxide is involved in collagen-induced  
19  
20 9 platelet activation. *Blood* 1998;91:484-90.  
21  
22 10 14 Freedman JE. Oxidative stress and platelets. *Arterioscler Thromb Vasc Biol* 2008;28:11-6.  
23  
24 11 15 Basili S, Pignatelli P, Tanzilli G, et al. Anoxia-reoxygenation enhances platelet ThromboxaneA2  
25  
26 12 production via Reactive Oxidant Species-generated NOX2: effect in patients undergoing elective  
27  
28 13 percutaneous coronary intervention. *Arterioscler Thromb Vasc Biol* 2011;31:1766-1771.  
29  
30 14 16 Takebe G, Yarimizu J, Saito Y, et al. A comparative study on the hydroperoxide and thiol  
31  
32 15 specificity of the glutathione peroxidase family and seleno-protein P. *J Biol Chem* 2002;277:41254-  
33  
34 16 41258.  
35  
36 17 17 Jin RC, Mahoney CE, Anderson LC, et al. Glutathione peroxidase-3 deficiency promotes  
37  
38 18 platelet-dependent thrombosis in vivo. *Circulation* 2011;123:1963-1973.  
39  
40 19 18 Singh A, Lee KJ, Lee CY, et al. Relation between myocardial glutathione content and extent of  
41  
42 20 ischemia-reperfusion injury. *Circulation* 1989;80:1795-1804.  
43  
44 21 19 Hinkel R, Boekstegers P, Kupatt C. Adjuvant early and late cardioprotective therapy: access to  
45  
46 22 the heart. *Cardiovasc Res.* 2012;94(2):226-36.  
47  
48 23 20 Truscelli G, Tanzilli G, Viceconte N, et al. Glutathione sodium salt as a novel adjunctive  
49  
50 24 treatment for acute myocardial infarction. *Med Hypotheses* 2017;102:48-50.  
51  
52 25 21 Henriques JP, Zijlstra F, van 't Hof AW, et al. Angiographic assessment of reperfusion in acute  
53  
54 26 myocardial infarction by myocardial blush grade. *Circulation* 2003;107:2115-2119.  
55  
56  
57  
58  
59  
60

- 1  
2  
3 1 22 Basili S, Tanzilli G, Mangieri E, et al. Intravenous Ascorbic Acid Infusion Improves Myocardial  
4  
5 2 Perfusion Grade During Elective Percutaneous Coronary Intervention. Relationship With Oxidative  
6  
7 3 Stress Markers. *J Am Coll Cardiol Intv* 2010;3:221-229.  
8  
9  
10 4 23 Brener SJ, Maehara A, Dizon JM, et al. Relationship between myocardial reperfusion, infarct  
11  
12 5 size, and mortality. *J Am Coll Cardiol* 2013;6:718-724.  
13  
14 6 24 Musiolik J, van Caster P, Skyschally A, et al. Reduction of infarct size by gentle reperfusion  
15  
16 7 without activation of reperfusion injury salvage kinases in pigs. *Cardiovasc Res* 2010;85:110-117.  
17  
18 8 25 Hausenloy DJ, Garcia-Dorado D, Bøtker HE, et al. Novel targets and future strategies for acute  
19  
20 9 cardioprotection: position paper of the European Society of cardiology working group on cellular  
21  
22 10 biology of the heart. *Cardiovasc Res* 2017; 113:564-585.  
23  
24 11 26 Carnevale R, Nocella C, et al. Blood hydrogen peroxide break-down activity in healthy subjects  
25  
26 12 and in patients at risk of cardiovascular events. *Atherosclerosis* 2018;274:29-34.  
27  
28 13 27 Piper HM, Abdallah Y, Schäfer C. The first minutes of reperfusion: a window of opportunity for  
29  
30 14 cardioprotection. *Cardiovasc Res* 2004;61:365-71.  
31  
32 15 28 Zhu X, Zuo L. Characterization of oxygen radical formation mechanism at early cardiac  
33  
34 16 ischemia. *Cell Death and Disease* 2013;4:e787.  
35  
36 17 29 Bolli R, Marban E. Molecular and cellular mechanisms of myocardial stunning. *Physiol Rev*  
37  
38 18 1999;79:609-634.  
39  
40 19 30 Freedman JE, Frei B, Welch GN, et al. Glutathione peroxidase potentiates the inhibition of  
41  
42 20 platelet function by S-nitrosothiols. *J Clin Invest* 1995;96:394-400.  
43  
44 21 31 Meister A. Glutathione-Ascorbic Acid Antioxidant System in Animals. *J Biol Chem*  
45  
46 22 1994;269:9397-9400.  
47  
48 23 32 Reffelmann T, Kloner RA. Microvascular reperfusion injury: rapid expansion of anatomic no  
49  
50 24 reflow during reperfusion in the rabbit. *Am J Physiol Heart Circ Physiol* 2002;283:H1099-H1107.  
51  
52 25 33 Rochitte CE, Lima JA, Bluemke DA, et al. Magnitude and time course of microvascular  
53  
54 26 obstruction and tissue injury after acute myocardial infarction. *Circulation* 1998;98:1006-1014.  
55  
56  
57  
58  
59  
60

1  
2  
3 1 34 Yaqin X, Huo Y, Toufektsian MC, et al. Activated platelets contribute importantly to myocardial  
4  
5 2 reperfusion injury. *Am J Physiol Heart Circ Physiol* 2006;290:H692-H699.  
6  
7  
8 3  
9  
10 4  
11  
12 5  
13  
14 6  
15 7  
16 8  
17 9  
18 10  
19 11  
20 12  
21 13  
22 14  
23 15  
24 16  
25 17  
26 18  
27 19  
28 20  
29 21  
30 22  
31 23  
32 24  
33 25  
34 26  
35 27  
36 28  
37 29  
38 30  
39 31  
40 32  
41 33  
42 34  
43 35  
44 36  
45 37  
46 38  
47 39  
48 40  
49 41  
50 42  
51 43  
52 44  
53 45  
54 46  
55  
56  
57  
58  
59  
60

For peer review only

1  
2  
3  
4  
5  
6  
7  
8  
9  
10  
11  
12  
13  
14  
15  
16  
17  
18  
19  
20  
21  
22  
23  
24  
25  
26  
27  
28  
29  
30  
31  
32  
33  
34  
35  
36  
37  
38  
39  
40  
41  
42  
43  
44  
45  
46  
47  
48  
49  
50  
51  
52  
53  
54  
55  
56  
57  
58  
59  
60  
151 **Table 1. Clinical characteristics of the study population**  
2

| Variables                     | GSH group<br>(n=25) | Placebo group<br>(n=25) | P value |
|-------------------------------|---------------------|-------------------------|---------|
| Age (y, mean±SD)              | 66 ± 10.7           | 66.9 ± 9.1              | 0.74    |
| Male, n (%)                   | 15 (60)             | 13 (52)                 | 0.98    |
| Body-mass index§<br>(mean+SD) | 26.9 ± 3.9          | 20 ± 3.8                | 0.38    |
| Killip class ≥ 3,<br>n (%)    | 2 (8)               | 0 (0)                   | 0.47    |
| Diabetes Mellitus, n<br>(%)   | 5 (20)              | 5 (20)                  | 1       |
| Hypertension, n (%)           | 14 (56)             | 17 (68)                 | 0.56    |
| Dyslipidemia, n (%)           | 11 (44)             | 13 (52)                 | 0.77    |
| Statin use, n (%)             | 8 (32)              | 8 (32)                  | 1       |
| Smokers, n (%)                | 17 (68)             | 13 (52)                 | 0.38    |

§ The body-mass index is the weight in kilograms divided by the square of the height in meters.

**Table 2. Angiographic parameters**

| Variables                                            | GSH group<br>(n=25) | Placebo group<br>(n=25) | P value |
|------------------------------------------------------|---------------------|-------------------------|---------|
| <b>Ischemia time#</b><br>(min; mean $\pm$ SD)        | 286 $\pm$ 88        | 270 $\pm$ 96            | 0.85    |
| <b>Thrombus Burden <math>\geq</math> 3,</b><br>n (%) | 12 (48)             | 11 (44)                 | 0.77    |
| <b>Thrombus aspiration, n</b><br>(%)                 | 13 (52)             | 12 (48)                 | 0.87    |
| <b>GP IIb/IIIa inhibitors,</b><br>n (%)              | 2 (8)               | 3 (12)                  | 0.63    |
| <b>MVD, n (%)</b>                                    | 13 (52)             | 11 (44)                 | 0.77    |
| <b>2 vessels,</b>                                    | 8 (32)              | 5 (20)                  | 0.89    |
| <b>3 vessels,</b>                                    | 5 (20)              | 6 (24)                  |         |
| <b>Staged PCI, n (%)</b>                             | 9 (36)              | 5 (20)                  |         |
| <b>IRA:</b>                                          |                     |                         |         |
| <b>LAD, n (%)</b>                                    | 10 (40)             | 9 (36)                  | 0.77    |
| <b>LCx, n (%)</b>                                    | 5 (20)              | 6 (24)                  | 0.73    |
| <b>RCA, n (%)</b>                                    | 10 (40)             | 10 (40)                 | 1       |

PCI = percutaneous coronary intervention; IRA = infarct related coronary artery; LAD = left anterior descending coronary artery; LCx = left circumflex coronary artery; RCA = Right coronary artery. #ischemia time was defined as the timing between symptom onset and balloon inflation.

1  
2  
3 **Table 3. Biochemical data**  
4  
5  
6

|                                                     | Baseline   |            |       | Reperfusion 2h |            |        | Follow-up (5 days) |            |        |
|-----------------------------------------------------|------------|------------|-------|----------------|------------|--------|--------------------|------------|--------|
| Variable                                            | GSH        | Placebo    | p     | GSH            | Placebo    | p      | GSH                | Placebo    | p      |
| <b>H<sub>2</sub>O<sub>2</sub></b><br>μM,<br>mean±SD | 40.6±8.4   | 43.6±11.6  | 0.305 | 28.4±12        | 42.8±14.1  | 0.0003 | 24±7               | 39.5±17.3  | 0.0001 |
| <b>Δ</b>                                            |            |            |       | -12.1±15.2     | -0.7±17.9  | 0.03   | -16.6±11.0         | -4.1±20.14 | 0.009  |
| <b>8-iso-PGF2α</b><br>pmol/L,<br>mean±SD            | 214.6±81.1 | 211.9±92.1 | 0.91  | 163.6±44.7     | 217.6±51.6 | 0.0003 | 159.9±34.2         | 213.1±50.9 | 0.0001 |
| <b>Δ</b>                                            |            |            |       | -50.9±92.9     | -3.3±1.29  | 0.02   | -54.6±62.1         | -1.2±115.7 | 0.02   |
| <b>HBA</b><br>%,<br>mean±SD                         | 43.6±7.4   | 43.4±11.9  | 0.94  | 57.9±8.6       | 43.9±8.7   | 0.0001 | 62.9±10.5          | 45.2±13.0  | 0.0001 |
| <b>Δ</b>                                            |            |            |       | +14.9±5.5      | +0.4±14.9  | 0.0004 | +19.4±10.2         | +1.8±17.1  | 0.0001 |
| <b>NO</b><br>μM,<br>mean±SD                         | 16.3±5.7   | 16.5±4.7   | 0.89  | 27.7±7.2       | 22.4±10    | 0.0356 | 35.5±8.1           | 23.5±15.5  | 0.0013 |
| <b>Δ</b>                                            |            |            |       | +11.4±6.8      | +5.8±10.5  | 0.05   | +19.2±9.7          | +7.0±14.7  | 0.002  |

45 **GSH** = reduced Glutathione; **H<sub>2</sub>O<sub>2</sub>** = Hydrogen Peroxide; **8-iso-PGF2α** = 8-iso-Prostaglandin-F2α;

46 **HBA** = H<sub>2</sub>O<sub>2</sub> break-down activity

**Table 4. Left Ventricular echocardiographic parameters at baseline and at follow-up**

| <b>Echo parameters</b>                                                                                                                                         | <b>Placebo<br/>(n= 25)</b> | <b>GSH<br/>(n=25)</b> | <b>P-value</b> |
|----------------------------------------------------------------------------------------------------------------------------------------------------------------|----------------------------|-----------------------|----------------|
| <b>Baseline</b>                                                                                                                                                |                            |                       |                |
| <b>LVEDV (mL/m<sup>2</sup>)</b>                                                                                                                                | 121.3 ± 17.2               | 124.4 ± 22.3          | 0.44           |
| <b>LVESV (mL/m<sup>2</sup>)</b>                                                                                                                                | 65.4 ± 11.3                | 66.3± 13.2            | 0.91           |
| <b>LVEF (%)</b>                                                                                                                                                | 47.5 ± 4.9                 | 46.9 ± 4.8            | 0.42           |
| <b>Follow-up</b>                                                                                                                                               |                            |                       |                |
| <b>LVEDV (mL/m<sup>2</sup>)</b>                                                                                                                                | 118.1 ± 17.8               | 113.2 ± 14.1          | 0.42           |
| <b>LVESV (mL/m<sup>2</sup>)</b>                                                                                                                                | 60.9 ± 10.7                | 58.8± 12.5            | 0.91           |
| <b>LVEF (%)</b>                                                                                                                                                | 49.1 ± 3.2                 | 49.8 ± 3.7            | 0.42           |
| <b>LVEDV = left ventricular end-diastolic volume; LVESV = left ventricular end-systolic volume; LVEF = left ventricular ejection fraction-diastolic volume</b> |                            |                       |                |



1  
2  
3  
4  
5  
6  
7  
8  
9  
10  
11  
12  
13  
14  
15  
16  
17  
18  
19  
20  
21  
22  
23  
24  
25  
26  
27  
28  
29  
30  
31  
32  
33  
34  
35  
36  
37  
38  
39  
40  
41  
42  
43  
44  
45  
46  
47  
48  
49  
50  
51  
52  
53  
54  
55  
56  
57  
58  
59  
60

CONSORT flowchart

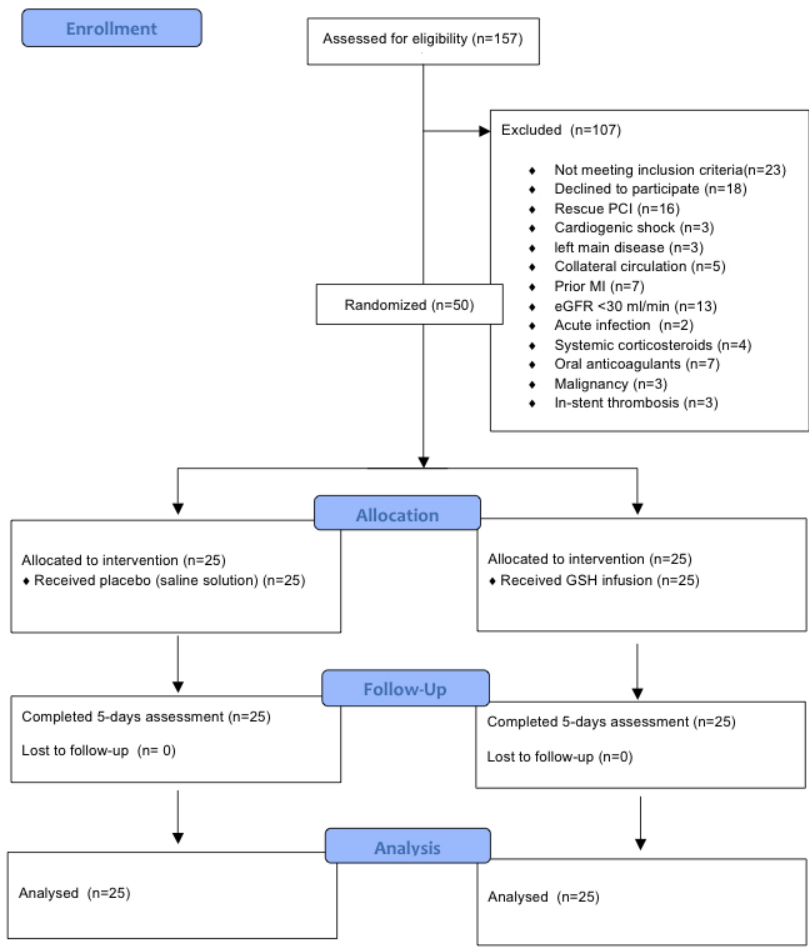

254x338mm (72 x 72 DPI)

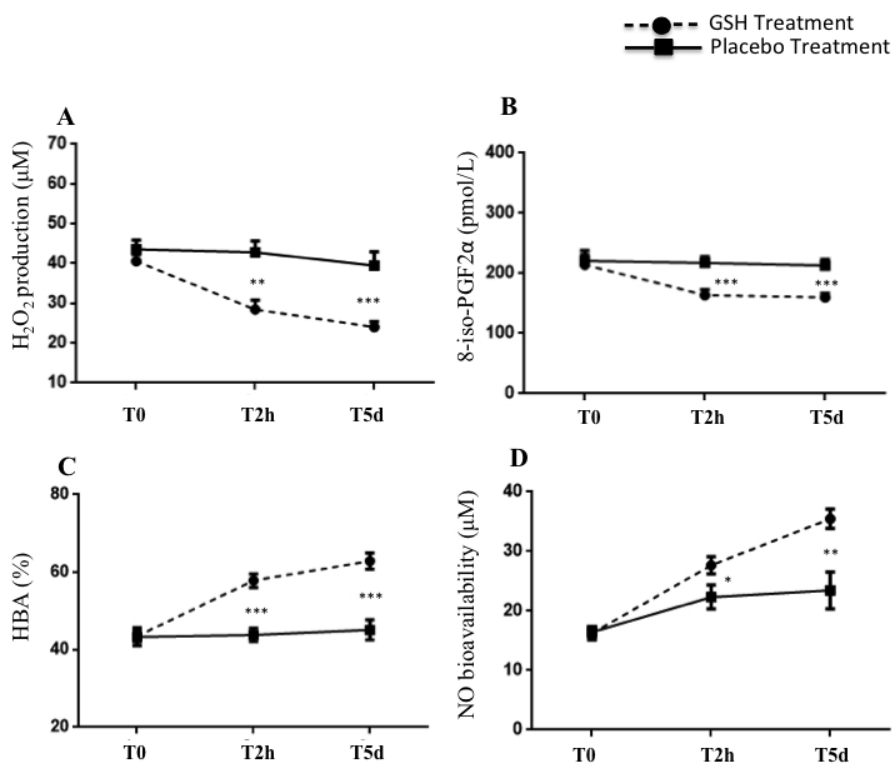

254x338mm (72 x 72 DPI)

1  
2  
3  
4  
5  
6  
7  
8  
9  
10  
11  
12  
13  
14  
15  
16  
17  
18  
19  
20  
21  
22  
23  
24  
25  
26  
27  
28  
29  
30  
31  
32  
33  
34  
35  
36  
37  
38  
39  
40  
41  
42  
43  
44  
45  
46  
47  
48  
49  
50  
51  
52  
53  
54  
55  
56  
57  
58  
59  
60

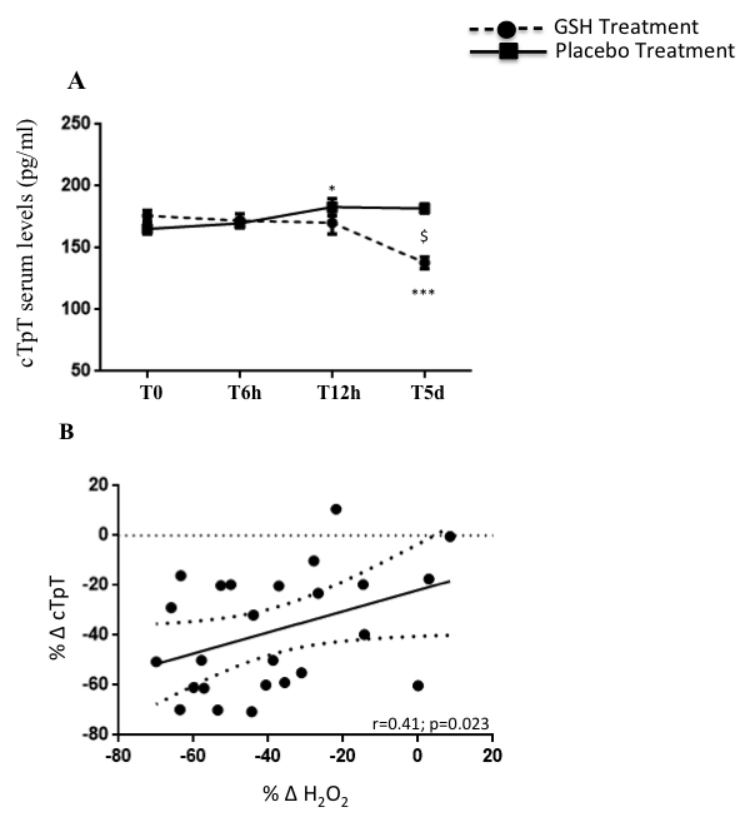

254x338mm (72 x 72 DPI)

1  
2  
3 **EudraCT Number: 2014-004486-25**

4 **Sponsor's Protocol Code Number: GSH2014**

5 National Competent Authority: Italy - Italian Medicines Agency

6 Clinical Trial Type: EEA CTA

7 Trial Status: submitted data of the pilot study. The trial is ongoing.

8 Date on which this record was first entered in the EudraCT database: 2014-12-04

9 Link: <https://www.clinicaltrialsregister.eu/ctr-search/trial/2014-004486-25/IT/>

12  
13 **A. Protocol Information**

14 Member State Concerned: Italy - Italian Medicines Agency

15 EudraCT number: 2014-004486-25

16 Full title of the trial: Prevention of the reperfusion myocardial damage in patients with acute  
17 myocardial infarct (STEMI) submitted to primary PCI through infusion of intravenous glutathione.

18 Sponsor's protocol code number: GSH2014

20  
21 **B. Sponsor Information**

22 Sponsor 1: University Hospital "Policlinico Umberto I"

23 Name of organization providing support: University Hospital "Policlinico Umberto I", Rome, Italy.

24 Functional name of contact point: Enrico Mangieri, University Hospital "Policlinico Umberto I".

25 Viale del Policlinico, 155 – Rome, Post code: 00161, Italy

26 E-mail: [enrico.mangieri@uniroma1.it](mailto:enrico.mangieri@uniroma1.it)

28  
29 **D. IMP Identification**

30 *IMP to be used in the trial has a marketing authorisation: Yes*

31 *Trade name: TAD*

32 Name of the Marketing Authorisation holder: Biomedica Foscama Group S.p.A.

33 Country which granted the Marketing Authorisation: Italy

34 Pharmaceutical form: Powder and solvent for solution for infusion

35 Routes of administration for this IMP: Intravenous use

36 *Information on Placebo*

37 Pharmaceutical form of the placebo: saline solution

38 Route of administration of the placebo: Intravenous use

40  
41 **E. General Information on the Trial**

42 Medical condition or disease under investigation

43 Medical condition(s) being investigated: ST-Segment Elevation Myocardial Infarction (STEMI).

44 Medical condition in easily understood language: acute myocardial infarct

45 Therapeutic area: Diseases [C] - Cardiovascular Diseases [C14]

46 Objective of the trial

47 Main objective of the trial: To verify if the intravenous infusion of "Glutathione Sodium Salt" it is  
48 able to reduce the level of oxidative state in the area of myocardial infarction.

49 Secondary objectives of the trial: To verify if the intravenous infusion of "Glutathione Sodium Salt"  
50 during the procedures of primary PCI it is able to limit the extension of the ischemic area, to  
51 reduce the incidence of the no-reflow, to improve the degree of myocardial blush and to decrease  
52 the indexes of suffering post-procedural ischemia (ST elevation; release of myocardial necrosis  
53 markers).

54 Principal inclusion criteria: STEMI patients submitted to p-PCI up to 12 hours.

55 Age ≥ 18 years. Women and Men. Signed informed consent

#### Principal exclusion criteria:

Patients with cardiac arrest, ventricular fibrillation, cardiogenic shock, stent thrombosis, previous acute myocardial infarction, or angina within 48 hours before infarction were not included in the study. Patients with evidence of coronary collaterals (2-3 Rentrop) to the region at risk on initial coronary angiography (at the time of admission) will be excluded. Moreover, patients with EF  $\leq 30\%$ , impaired renal function (creatinine  $> 3.0$  mg/dl), recipient of heart transplant, a life expectancy less than 12 months, has known allergies to aspirin, clopidogrel bisulfate, heparin, contrast media or stainless steel that cannot be managed medically were excluded. Patient needs therapy with warfarin or currently participating in an investigational drug or another device study were not considered enrolling.

#### End points

Primary end point(s): The primary endpoint will consist in the assessment of the effects of the infusion of "Glutathione Sodium Salt" on the reduction of the oxidative markers and inflammation after PCI.

Timepoint(s) of clinical evaluation of this end point: before, 2 hour and 5 days from the p-PCI

Secondary end point(s): The secondary endpoint will include: (1) the assessment of the variations of the corrected TIMI frame count (cTFC) and the TIMI Myocardial Perfusion Grade (TMPG) after p-PCI; (2) the assessment of the middle values of peak of the cardiac Troponin, after the procedure; (3) to verify, through telephone contact or a programmed visit, the principal adverse clinical events as death, acute myocardial infarct, stent's thrombosis of the treated vessels or the occurrence of a new revascularization, up to 6 months after the procedure.

Medical Doctors don't have the knowledge both about the possible infusion of the Glutathione Sodium Salt, in the examined patient, then others clinical data.

Moreover, serological levels of Troponin and creatinine will be measured before the p-PCI and after the procedure (2, 6, 12 and 24 hours).

Besides, through 2D Echocardiography with Simpson's biplane method the FE will be calculate at admission and after hospital discharge.

If clinical-instrumental signs of ischemia will rise up, the patient will be submitted to a new angiography.

Definition of the end of the trial and justification where it is not the last visit of the last subject undergoing the trial: LVLS or telephonic contact

Population of Trial Subjects

Trial has subjects under 18: No

Adults (18-64 years): Yes

Number of subjects for this age range: 30

Elderly ( $\geq 65$  years): Yes

Number of subjects for this age range: 60

Female: Yes

Male: Yes

Patients: Yes

Specific vulnerable populations: Yes

Women of childbearing potential not using contraception: Yes

Women of child-bearing potential using contraception: Yes

1  
2  
3 Pregnant women: No  
4 Nursing women: No  
5 Emergency situation: No  
6 Subjects incapable of giving consent personally: No  
7 Planned number of subjects to be included: 90  
8  
9

10 **F. Investigator Networks to be involved in the Trial**

11 N. Review by the Competent Authority or Ethics Committee in the country concerned  
12 N. Competent Authority Decision: Authorised  
13 N. Date of Competent Authority Decision: 2015-01-13  
14 N. Ethics Committee Opinion of the trial application: Favourable  
15 N. Date of Ethics Committee Opinion: 2015-02-12  
16 N. Centers involved in the study: Department of Heart and Great Vessel "A. Reale", Sapienza  
17 University of Rome (coordinator centre) - "Santa Maria" Terni Hospital - "San Giovanni  
18 Evangelista" Tivoli Hospital, all in Italy.  
19 P. End of Trial Status: analyzed as pilot study the first 50 enrolled patients. Ongoing.  
20  
21  
22  
23  
24  
25  
26  
27  
28  
29  
30  
31  
32  
33  
34  
35  
36  
37  
38  
39  
40  
41  
42  
43  
44  
45  
46  
47  
48  
49  
50  
51  
52  
53  
54  
55  
56  
57  
58  
59  
60

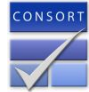

## CONSORT 2010 checklist of information to include when reporting a randomised trial\*

| Section/Topic                    | Item No | Checklist item                                                                                                                                                                              | Reported on page No |
|----------------------------------|---------|---------------------------------------------------------------------------------------------------------------------------------------------------------------------------------------------|---------------------|
| <b>Title and abstract</b>        |         |                                                                                                                                                                                             |                     |
|                                  | 1a      | Identification as a randomised trial in the title                                                                                                                                           | 1                   |
|                                  | 1b      | Structured summary of trial design, methods, results, and conclusions (for specific guidance see CONSORT for abstracts)                                                                     | 2                   |
| <b>Introduction</b>              |         |                                                                                                                                                                                             |                     |
| Background and objectives        | 2a      | Scientific background and explanation of rationale                                                                                                                                          | 4                   |
|                                  | 2b      | Specific objectives or hypotheses                                                                                                                                                           | 5                   |
| <b>Methods</b>                   |         |                                                                                                                                                                                             |                     |
| Trial design                     | 3a      | Description of trial design (such as parallel, factorial) including allocation ratio                                                                                                        | 6                   |
|                                  | 3b      | Important changes to methods after trial commencement (such as eligibility criteria), with reasons                                                                                          | NA                  |
| Participants                     | 4a      | Eligibility criteria for participants                                                                                                                                                       | 6                   |
|                                  | 4b      | Settings and locations where the data were collected                                                                                                                                        | 7                   |
| Interventions                    | 5       | The interventions for each group with sufficient details to allow replication, including how and when they were actually administered                                                       | 7                   |
| Outcomes                         | 6a      | Completely defined pre-specified primary and secondary outcome measures, including how and when they were assessed                                                                          | 7-8                 |
|                                  | 6b      | Any changes to trial outcomes after the trial commenced, with reasons                                                                                                                       | NA                  |
| Sample size                      | 7a      | How sample size was determined                                                                                                                                                              | 9                   |
|                                  | 7b      | When applicable, explanation of any interim analyses and stopping guidelines                                                                                                                | 9                   |
| <b>Randomisation:</b>            |         |                                                                                                                                                                                             |                     |
| Sequence generation              | 8a      | Method used to generate the random allocation sequence                                                                                                                                      | 7                   |
|                                  | 8b      | Type of randomisation; details of any restriction (such as blocking and block size)                                                                                                         | 7                   |
| Allocation concealment mechanism | 9       | Mechanism used to implement the random allocation sequence (such as sequentially numbered containers), describing any steps taken to conceal the sequence until interventions were assigned | 7                   |
| Implementation                   | 10      | Who generated the random allocation sequence, who enrolled participants, and who assigned participants to interventions                                                                     | 7                   |
| Blinding                         | 11a     | If done, who was blinded after assignment to interventions (for example, participants, care providers, those                                                                                | 7                   |

|                                                      |     |                                                                                                                                                   |                    |
|------------------------------------------------------|-----|---------------------------------------------------------------------------------------------------------------------------------------------------|--------------------|
|                                                      |     | assessing outcomes) and how                                                                                                                       |                    |
|                                                      | 11b | If relevant, description of the similarity of interventions                                                                                       | NA                 |
| Statistical methods                                  | 12a | Statistical methods used to compare groups for primary and secondary outcomes                                                                     | 9-10               |
|                                                      | 12b | Methods for additional analyses, such as subgroup analyses and adjusted analyses                                                                  | NA                 |
| <b>Results</b>                                       |     |                                                                                                                                                   |                    |
| Participant flow (a diagram is strongly recommended) | 13a | For each group, the numbers of participants who were randomly assigned, received intended treatment, and were analysed for the primary outcome    | 7                  |
|                                                      | 13b | For each group, losses and exclusions after randomisation, together with reasons                                                                  | 7                  |
| Recruitment                                          | 14a | Dates defining the periods of recruitment and follow-up                                                                                           | 6                  |
|                                                      | 14b | Why the trial ended or was stopped                                                                                                                | NA                 |
| Baseline data                                        | 15  | A table showing baseline demographic and clinical characteristics for each group                                                                  | 21-22              |
| Numbers analysed                                     | 16  | For each group, number of participants (denominator) included in each analysis and whether the analysis was by original assigned groups           | 10                 |
| Outcomes and estimation                              | 17a | For each primary and secondary outcome, results for each group, and the estimated effect size and its precision (such as 95% confidence interval) | 10-11              |
|                                                      | 17b | For binary outcomes, presentation of both absolute and relative effect sizes is recommended                                                       | NA                 |
| Ancillary analyses                                   | 18  | Results of any other analyses performed, including subgroup analyses and adjusted analyses, distinguishing pre-specified from exploratory         | NA                 |
| Harms                                                | 19  | All important harms or unintended effects in each group (for specific guidance see CONSORT for harms)                                             | 10                 |
| <b>Discussion</b>                                    |     |                                                                                                                                                   |                    |
| Limitations                                          | 20  | Trial limitations, addressing sources of potential bias, imprecision, and, if relevant, multiplicity of analyses                                  | 13-14              |
| Generalisability                                     | 21  | Generalisability (external validity, applicability) of the trial findings                                                                         | 14                 |
| Interpretation                                       | 22  | Interpretation consistent with results, balancing benefits and harms, and considering other relevant evidence                                     | 14                 |
| <b>Other information</b>                             |     |                                                                                                                                                   |                    |
| Registration                                         | 23  | Registration number and name of trial registry                                                                                                    | 5                  |
| Protocol                                             | 24  | Where the full trial protocol can be accessed, if available                                                                                       | Supplementary file |
| Funding                                              | 25  | Sources of funding and other support (such as supply of drugs), role of funders                                                                   | 16                 |

\*We strongly recommend reading this statement in conjunction with the CONSORT 2010 Explanation and Elaboration for important clarifications on all the items. If relevant, we also recommend reading CONSORT extensions for cluster randomised trials, non-inferiority and equivalence trials, non-pharmacological treatments, herbal interventions, and pragmatic trials. Additional extensions are forthcoming: for those and for up to date references relevant to this checklist, see [www.consort-statement.org](http://www.consort-statement.org).
